# Supplementary material for: Assessing the Impact of Geographical Distribution and Genetic Diversity on Metabolic Profiles of a Medicinal Plant, Embelia ribes Burm. f
Source: MDPI journal article supplement (doi:10.3390/plants11212861), 2022-10-27
Supplement: s1 [file s1]

## Supplemental Figures

**Figure S1: Representative LC-MS chromatograms (BPC) from fruits samples from all accessions. Representative chromatograms are showing in (A) negative and (B) positive mode.**

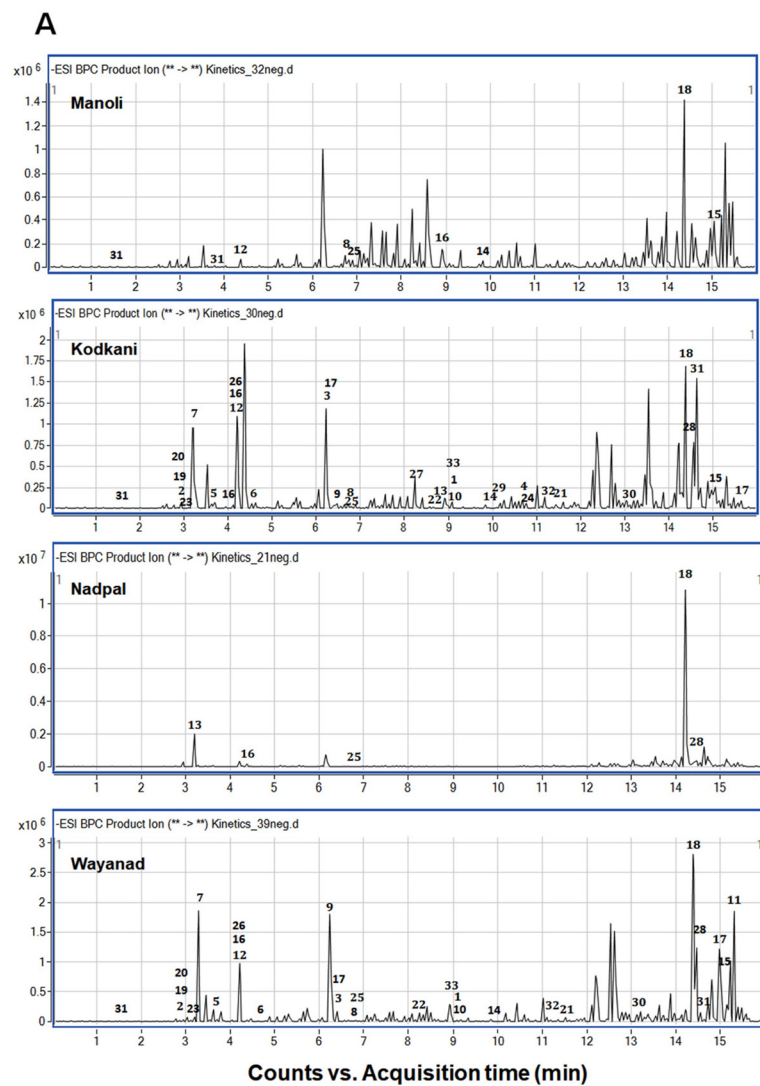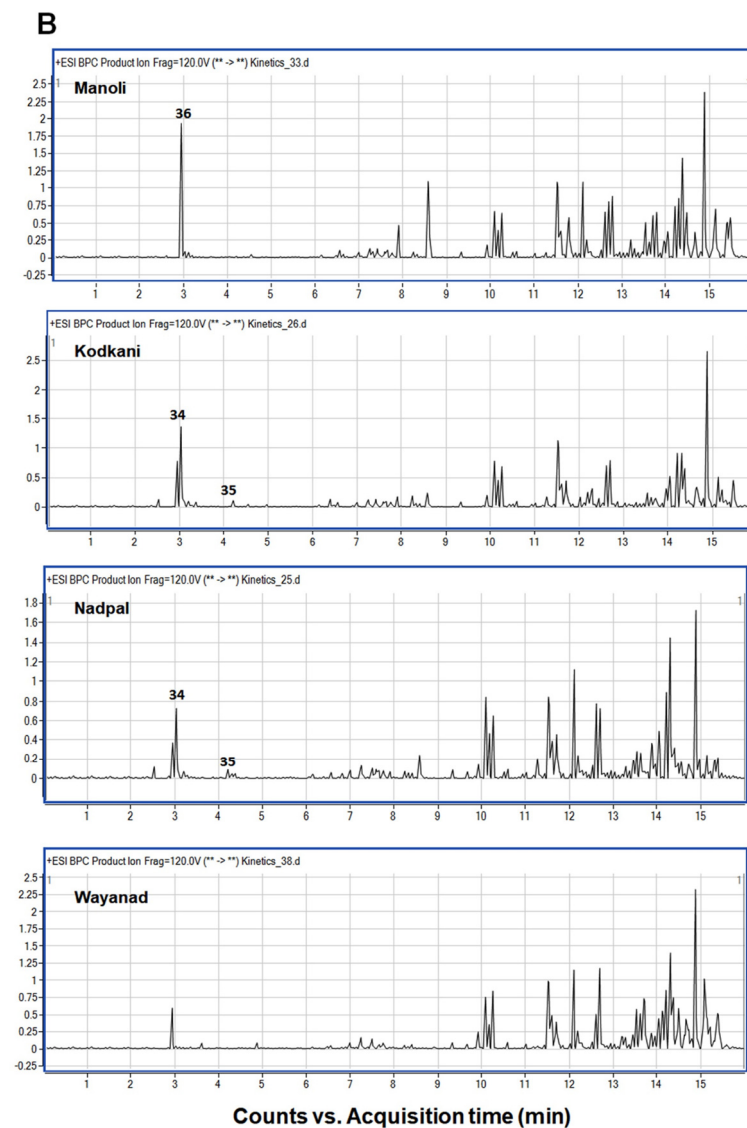

Figure S2: MS and MS-MS spectra for 36 identified compounds from different accessions of Embelia fruits.

1.  $C_6H_4O_2$ ,  $m/z$ -153.0197, 1, 2-Benzoquinone

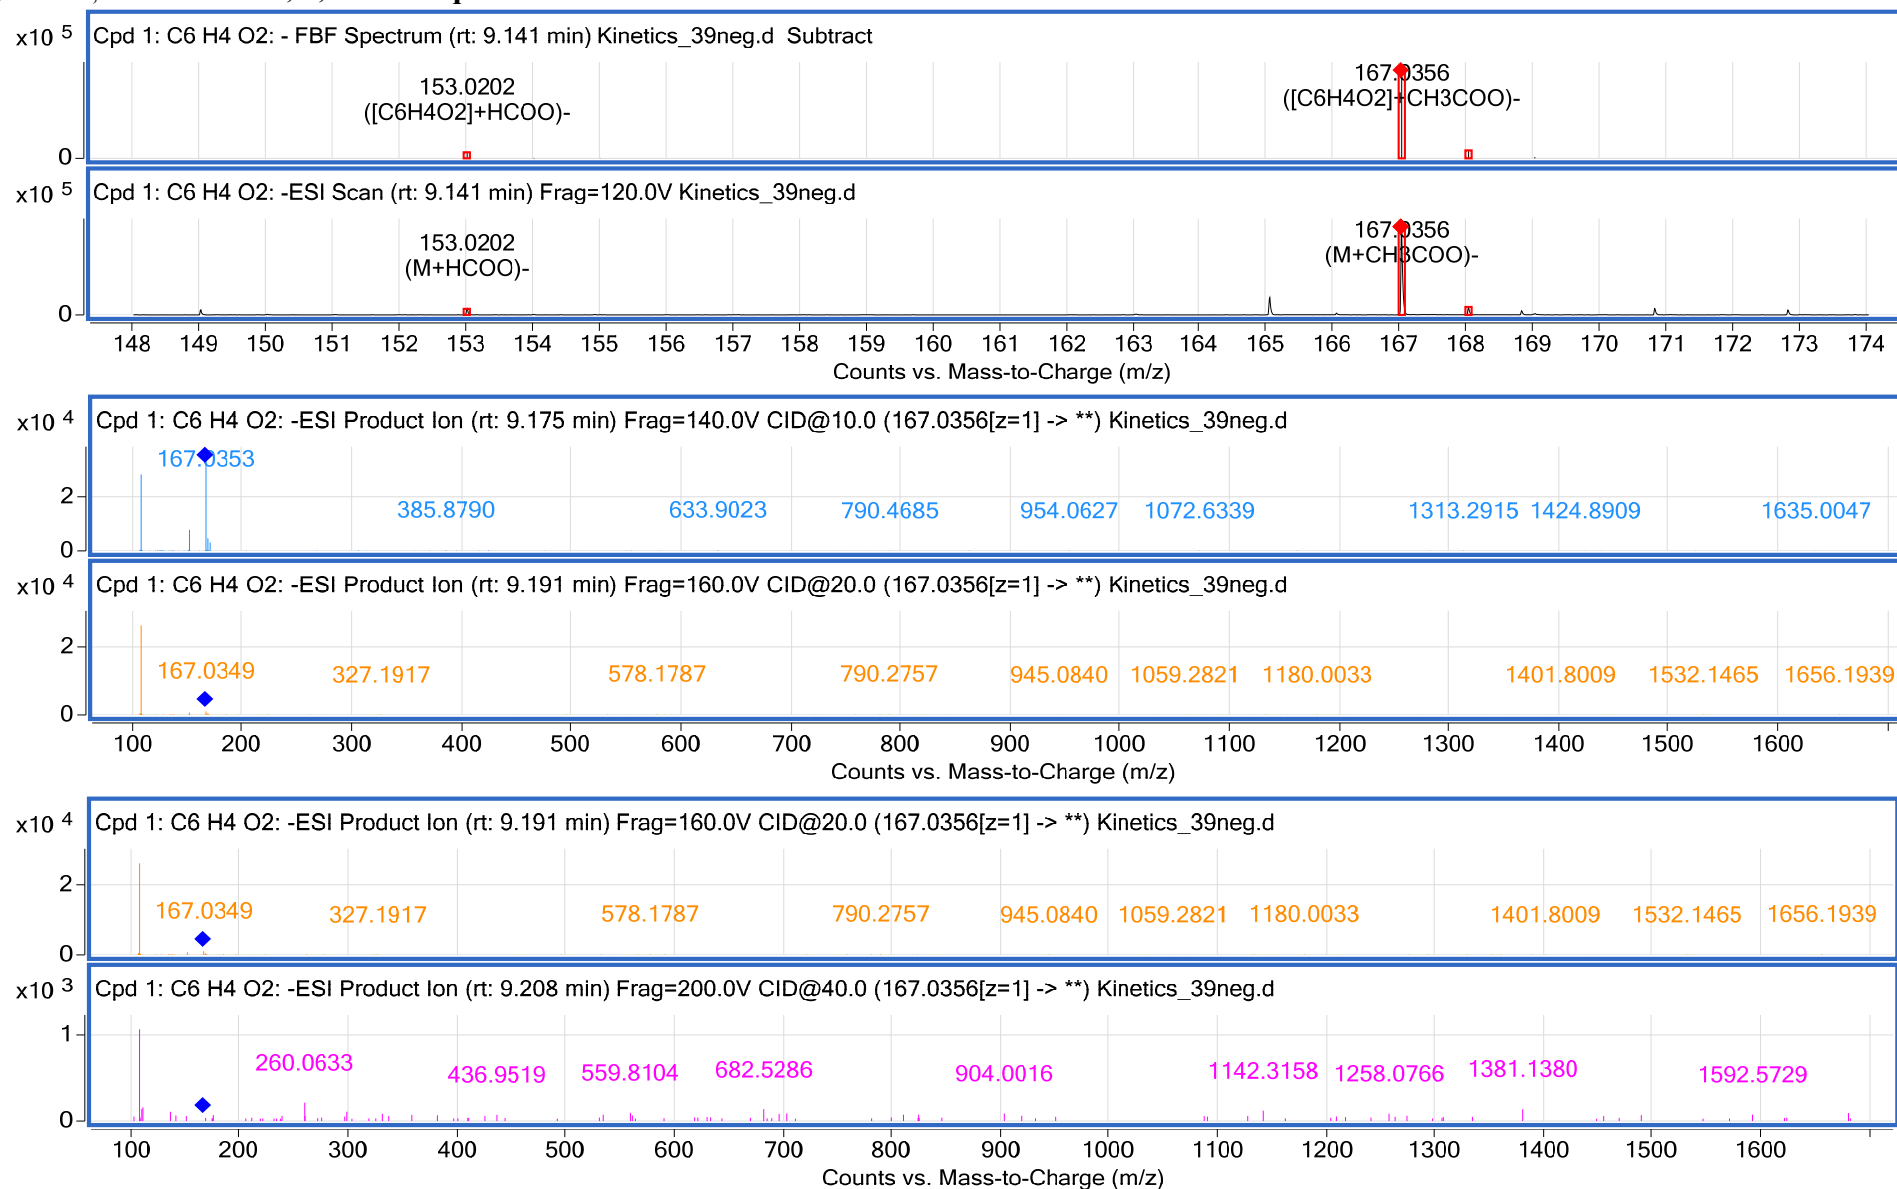

## 2. $C_5H_{12}S_2$ , m/z - 135.0307, 1-pentanesulfenothoic acid

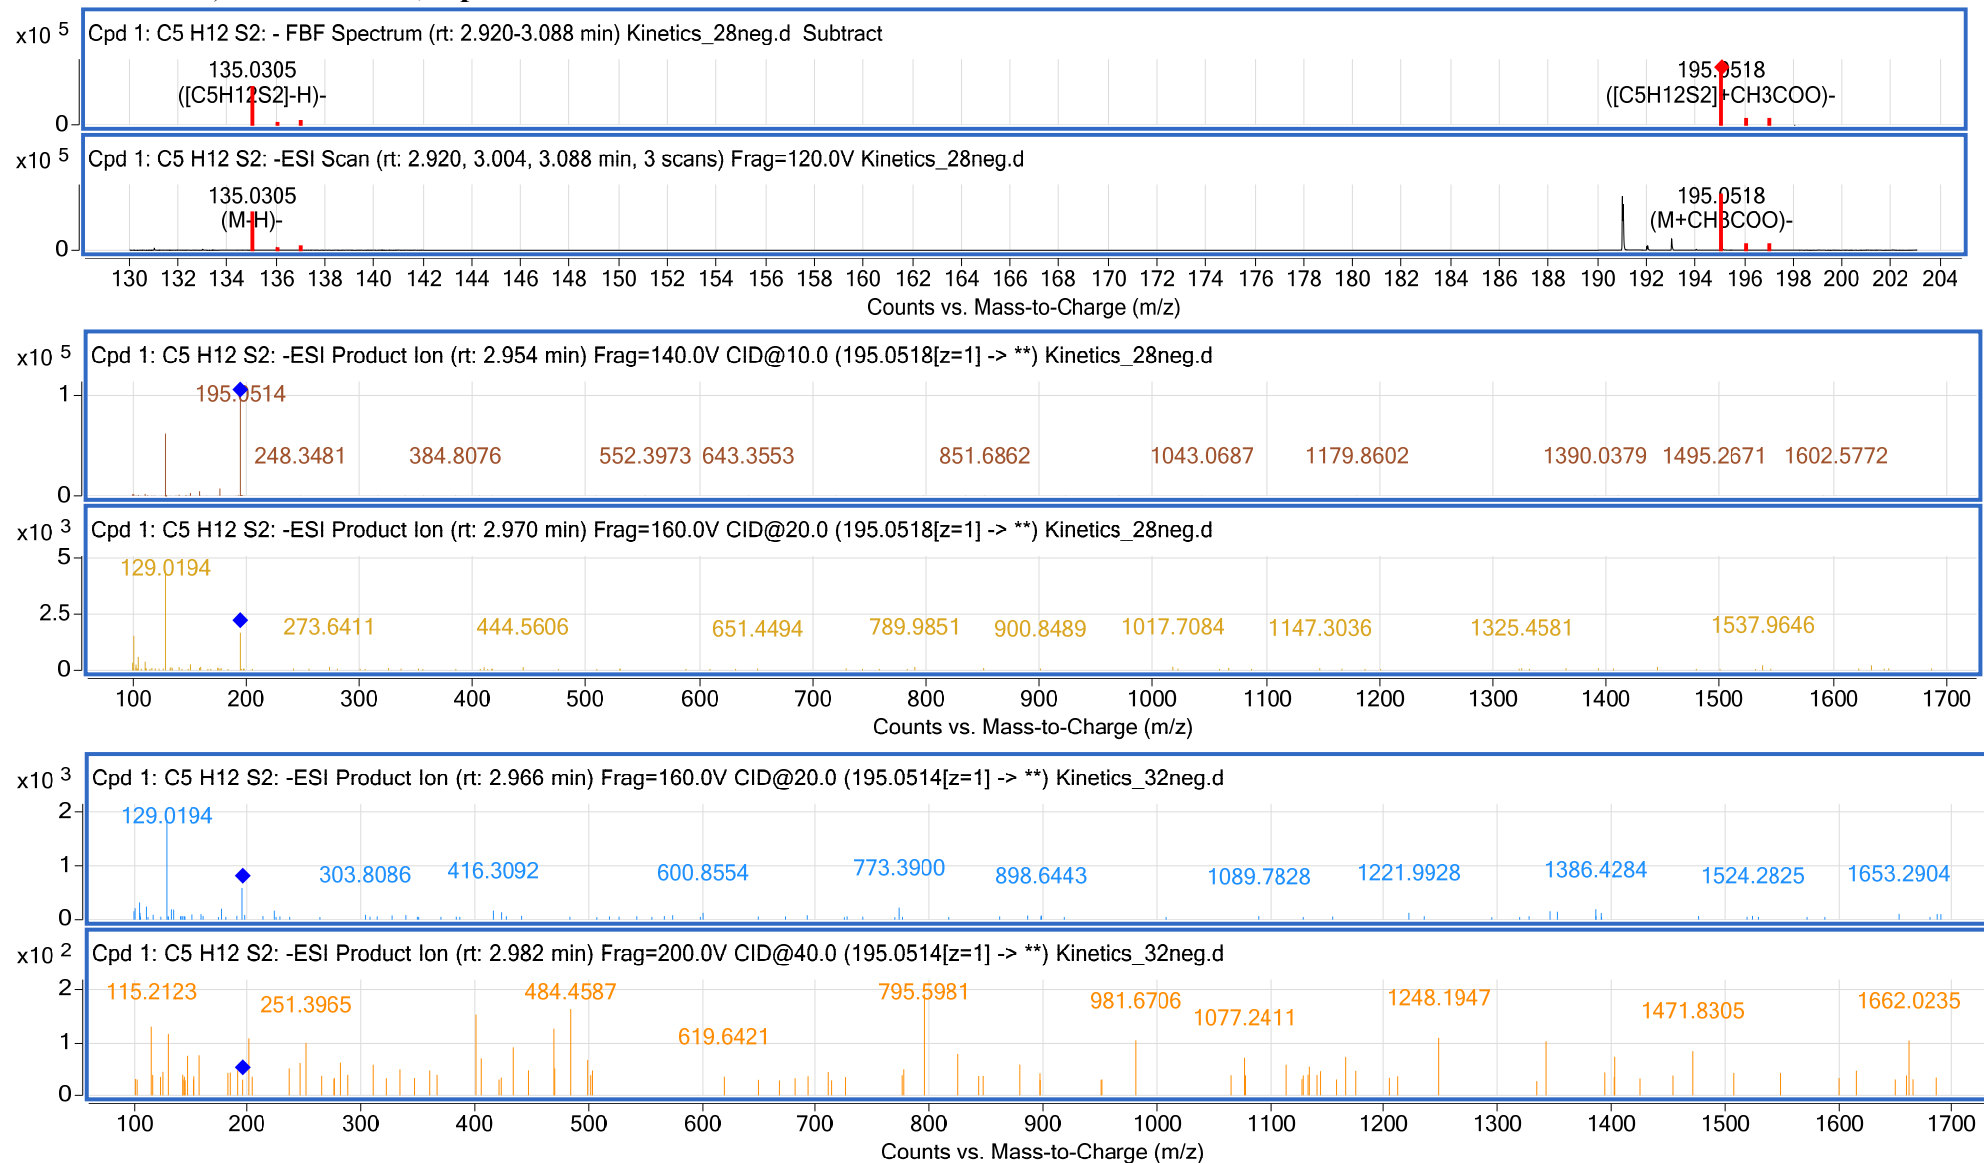

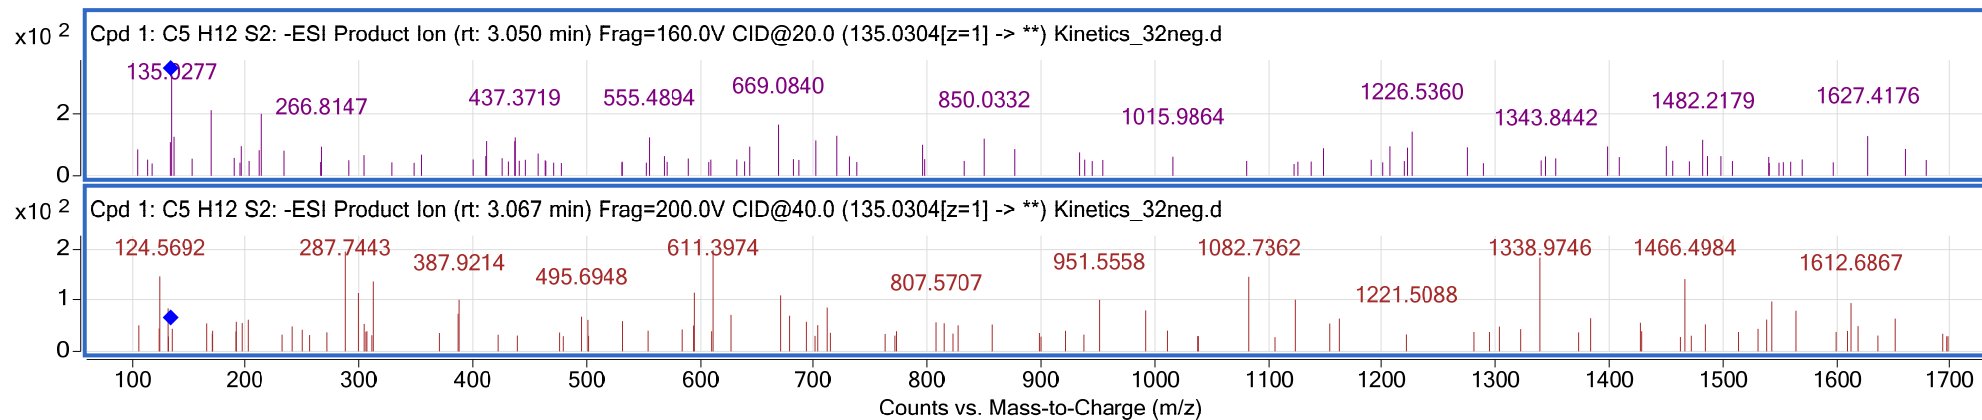

### 3. C<sub>6</sub> H<sub>8</sub> O<sub>5</sub>, m/z- 205.0361, 2-Formylglutarate

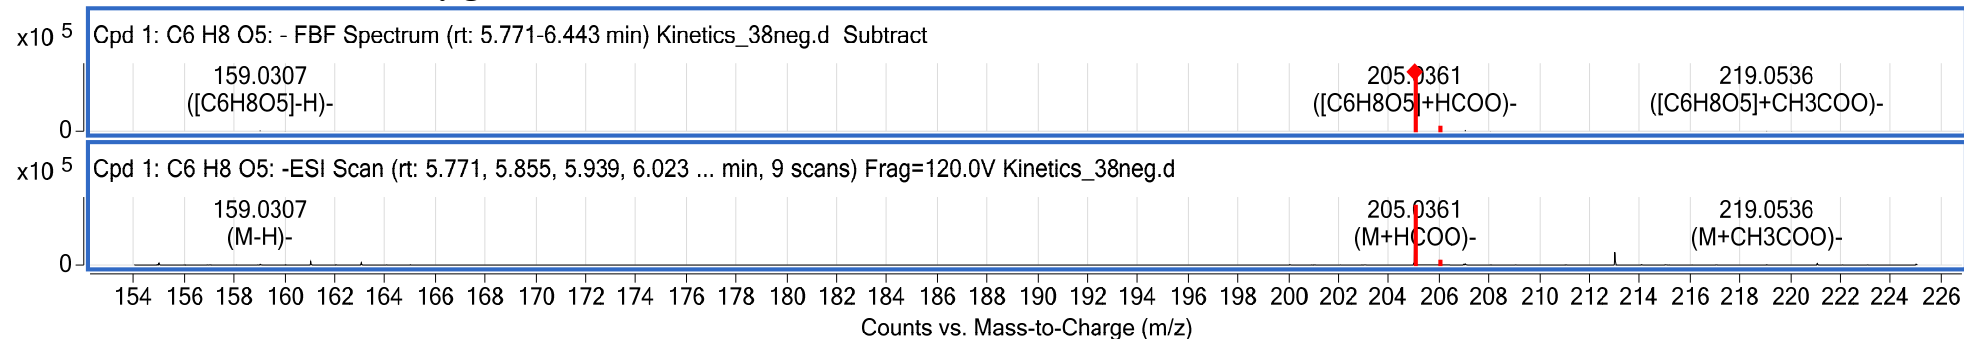

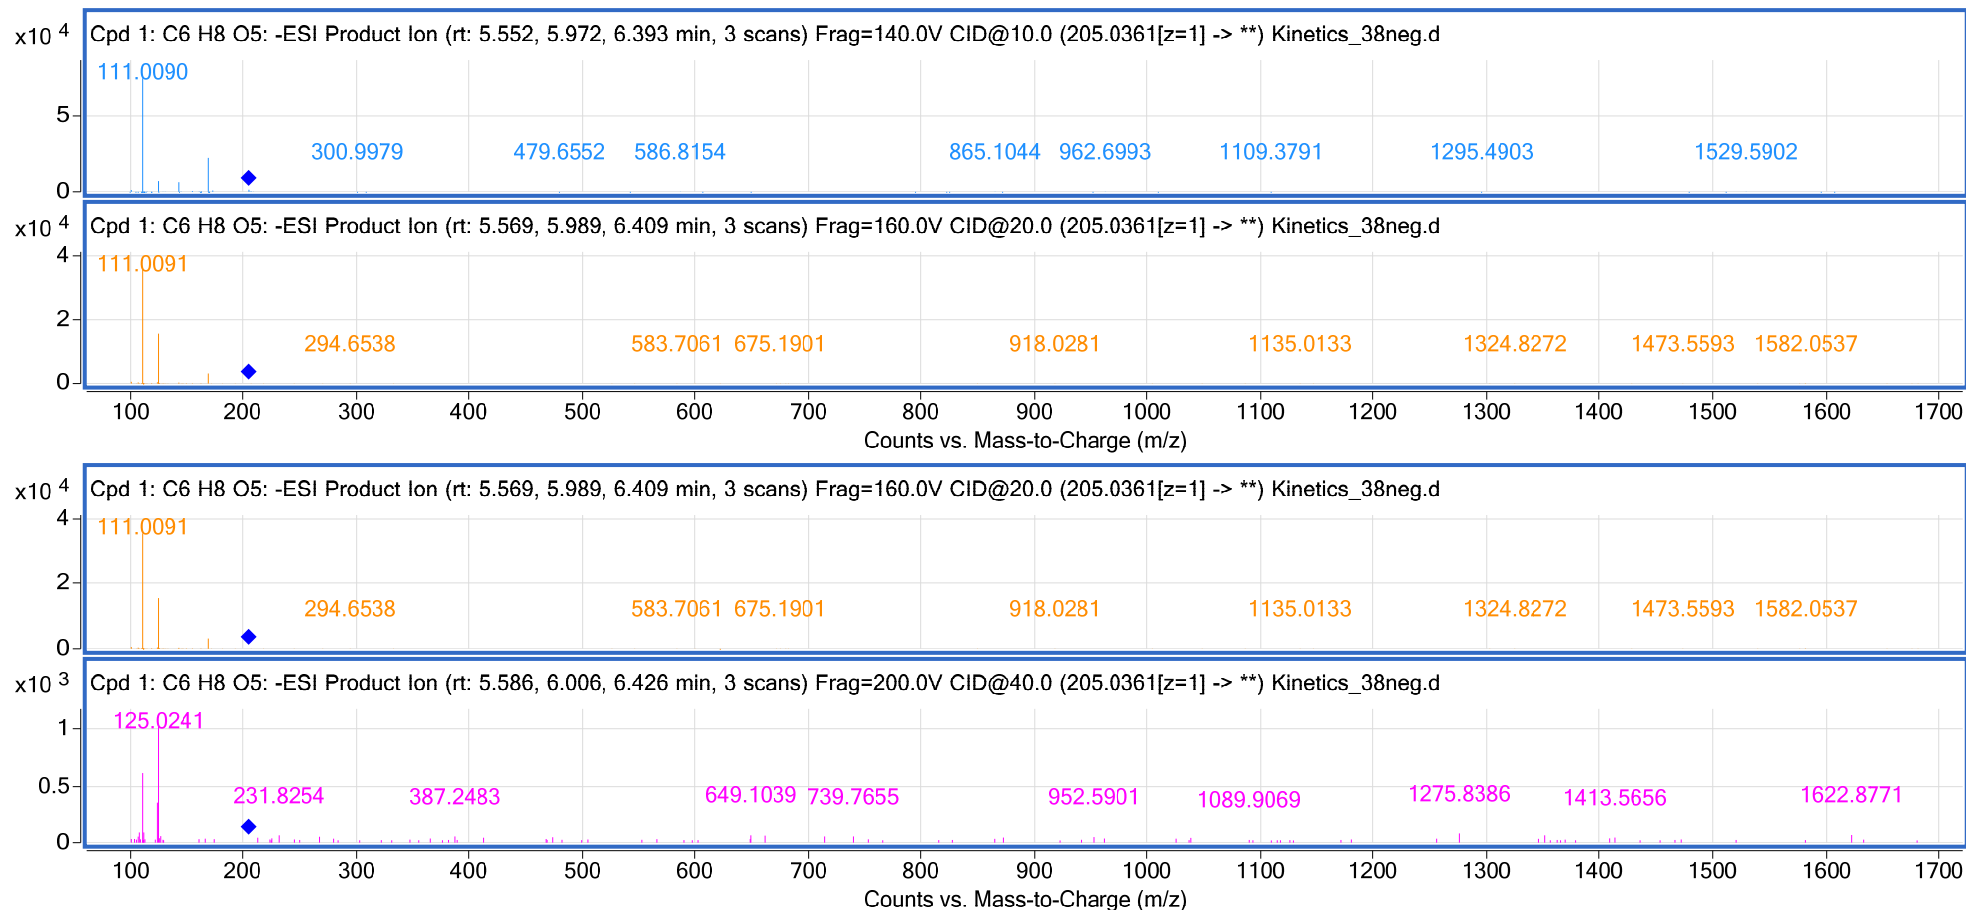

#### 4. **C<sub>15</sub> H<sub>12</sub> O<sub>5</sub>, m/z- 271.0626, 3,4,5-Trihydroxyflavanone**

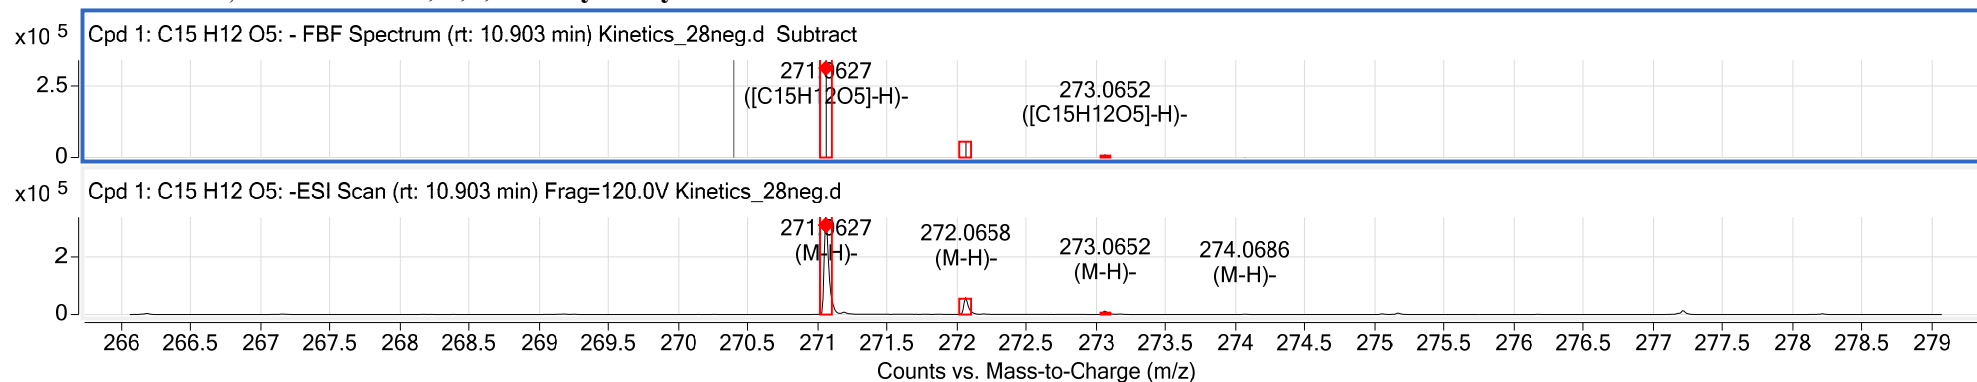

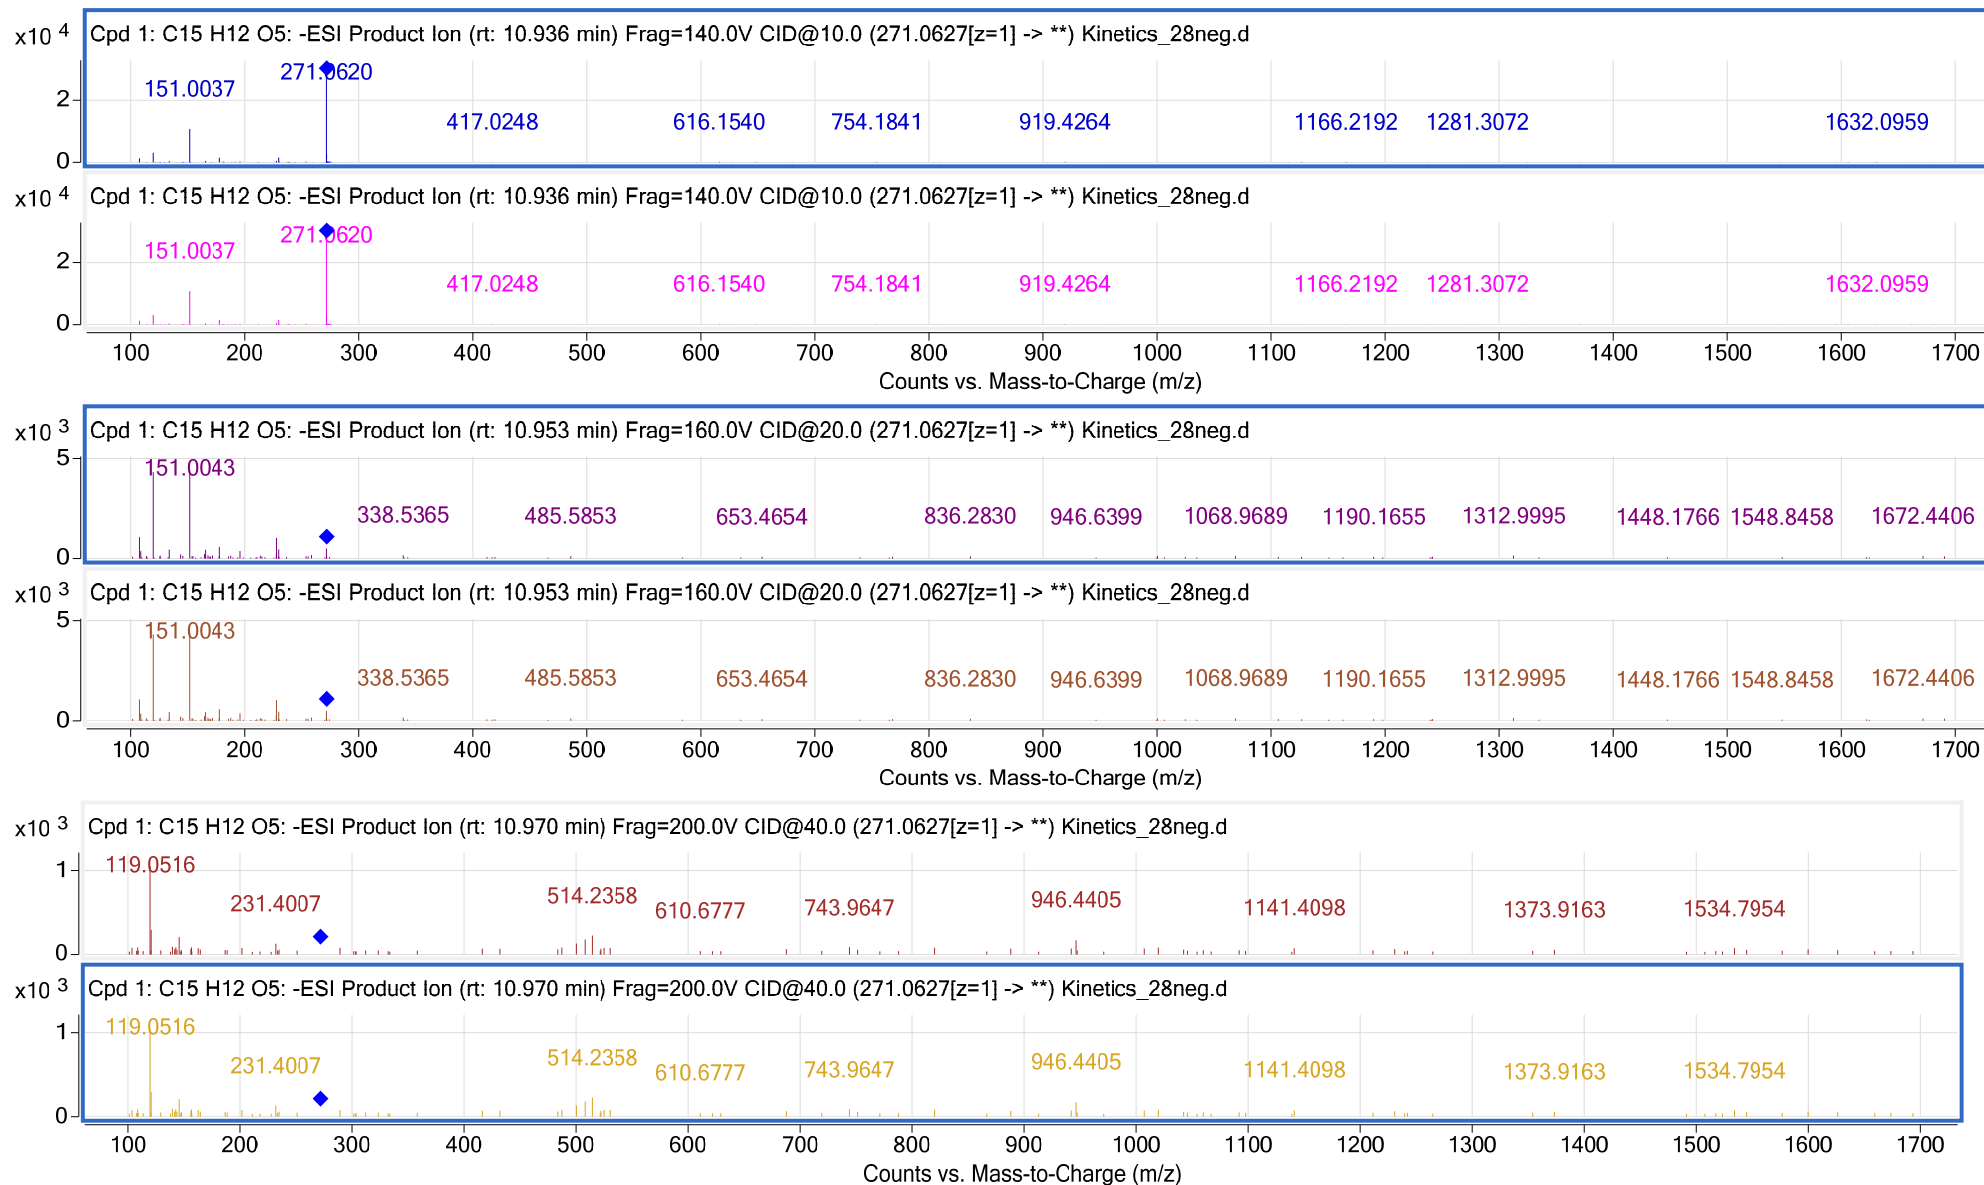

5. **C<sub>4</sub> H<sub>8</sub> O<sub>4</sub>, m/z- 179.0566, mass-120.0432, 3, 4-Dihydroxybutyric acid**

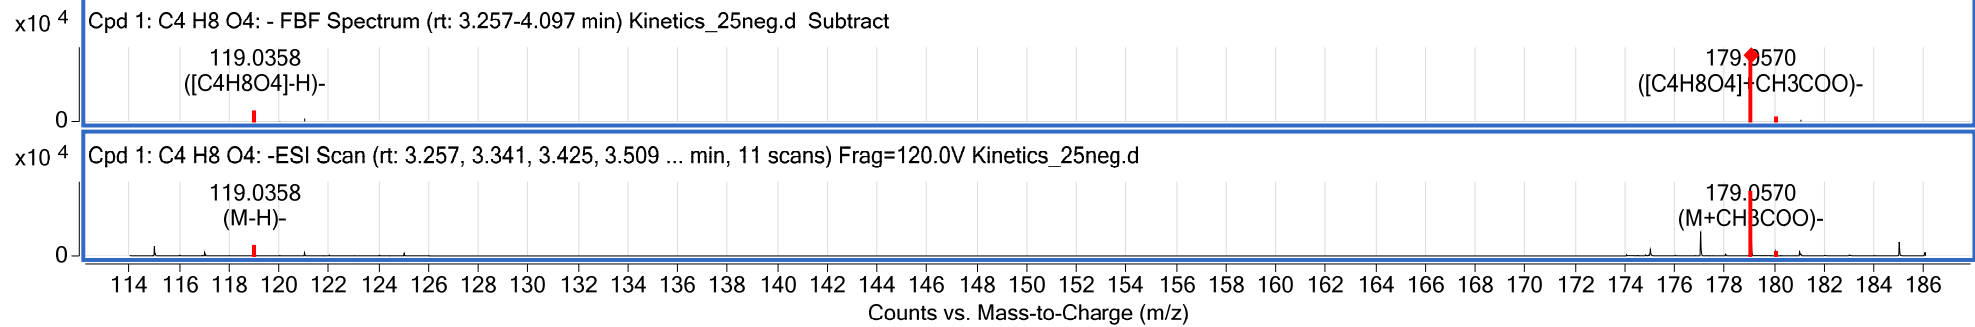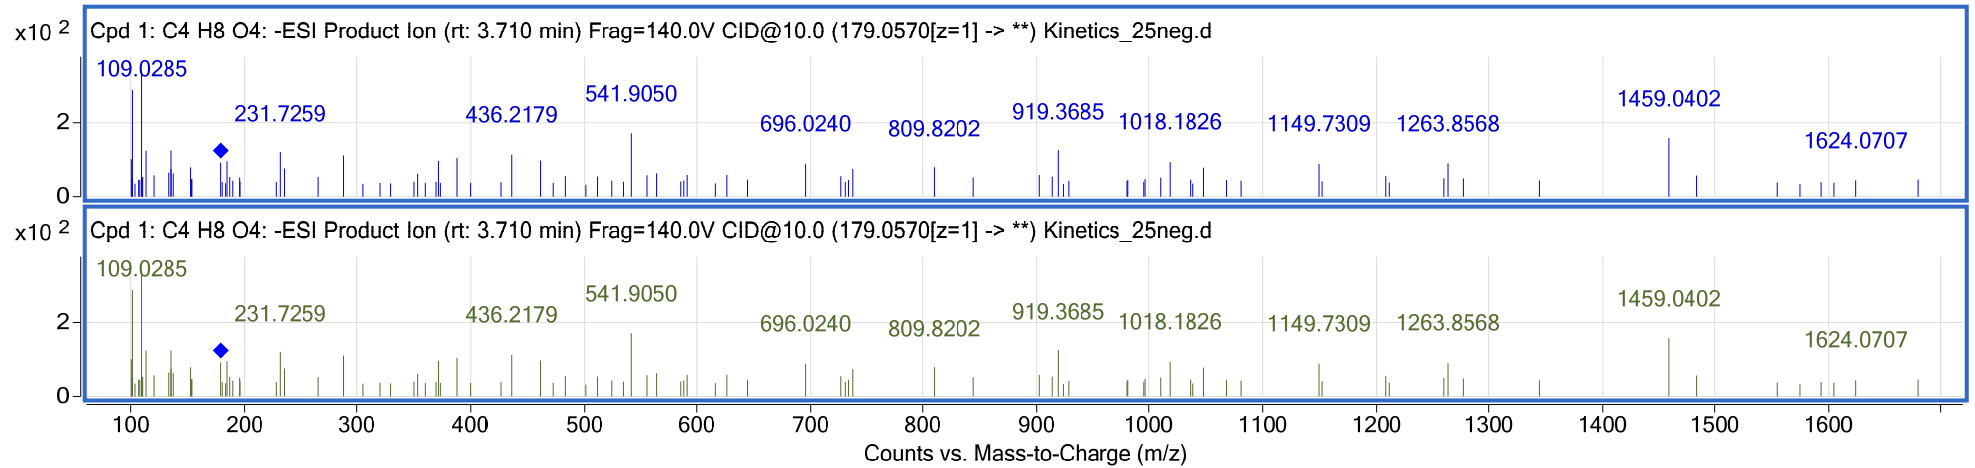

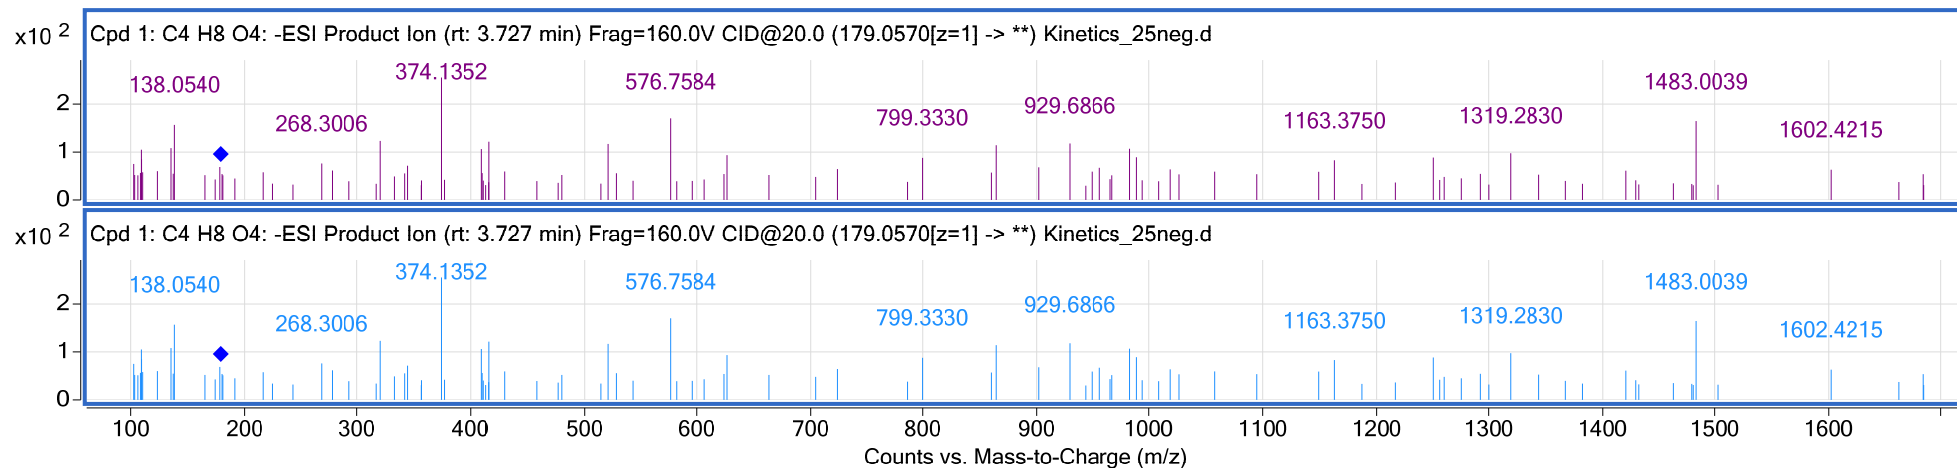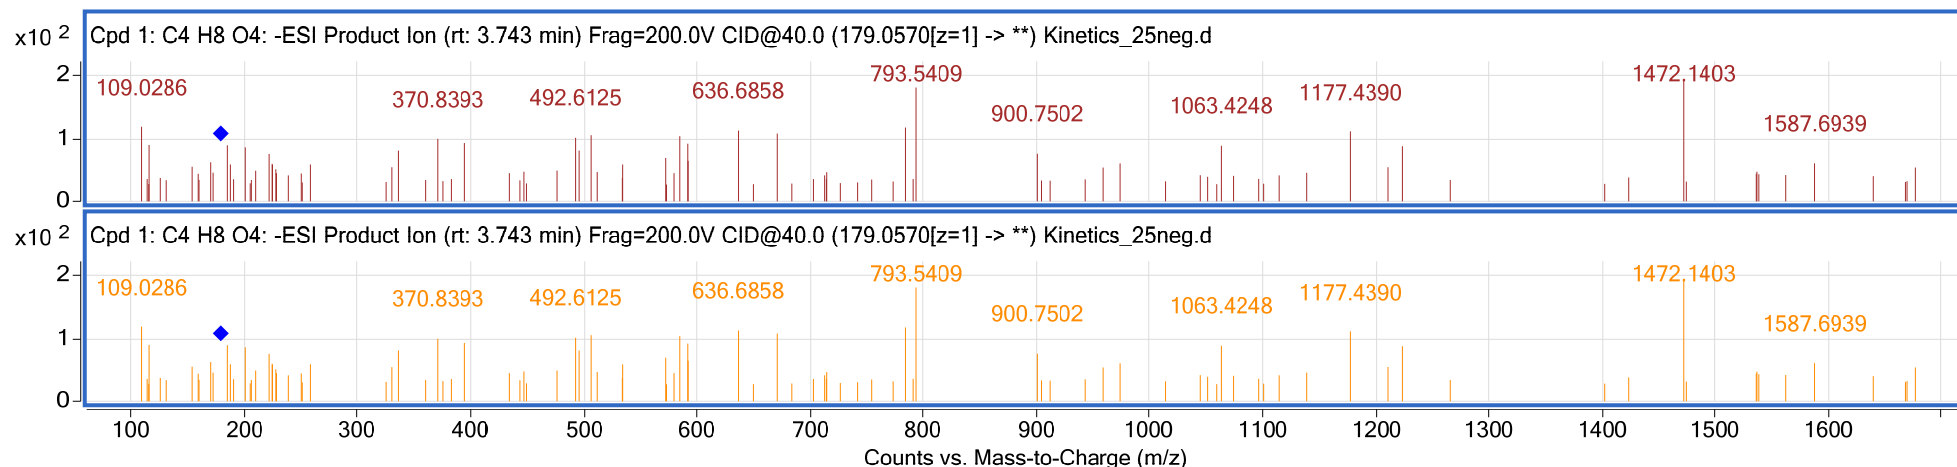

## 6. C<sub>9</sub> H<sub>11</sub> N O<sub>3</sub>, m/z- 180.0672, 3-Amino-3-(4-hydroxyphenyl) propanoate

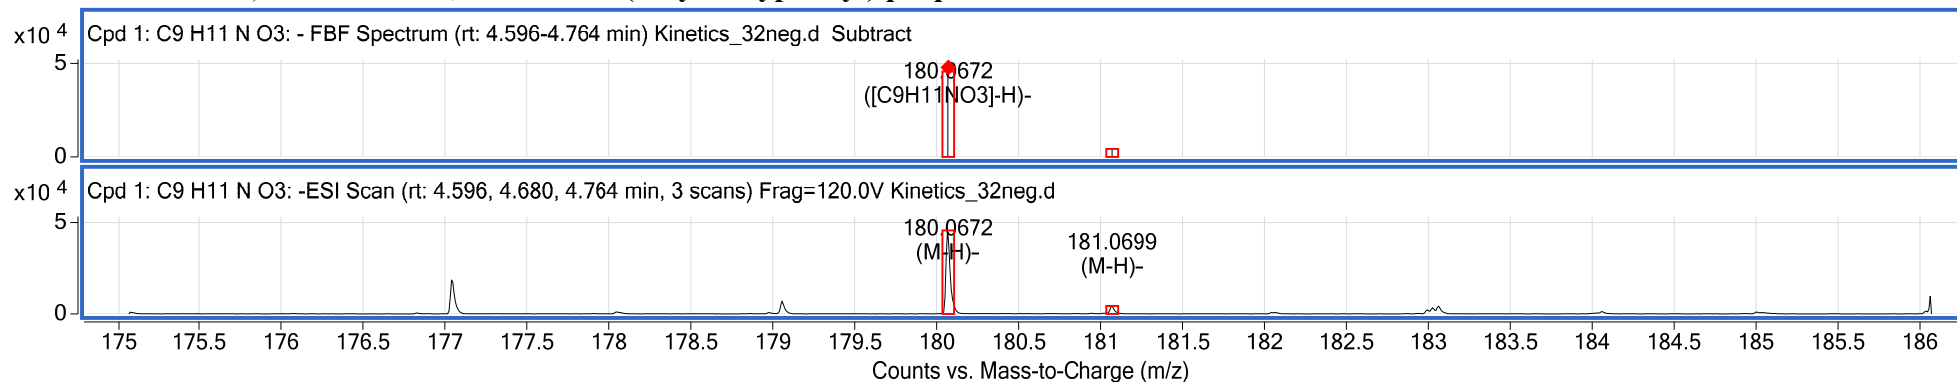



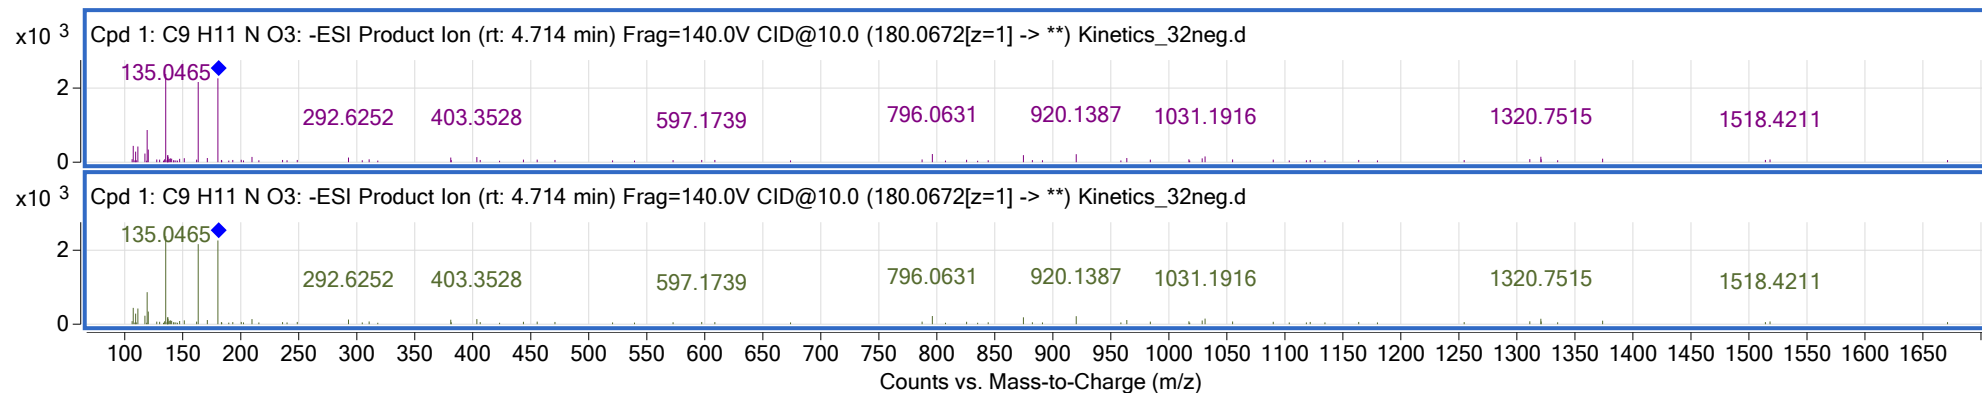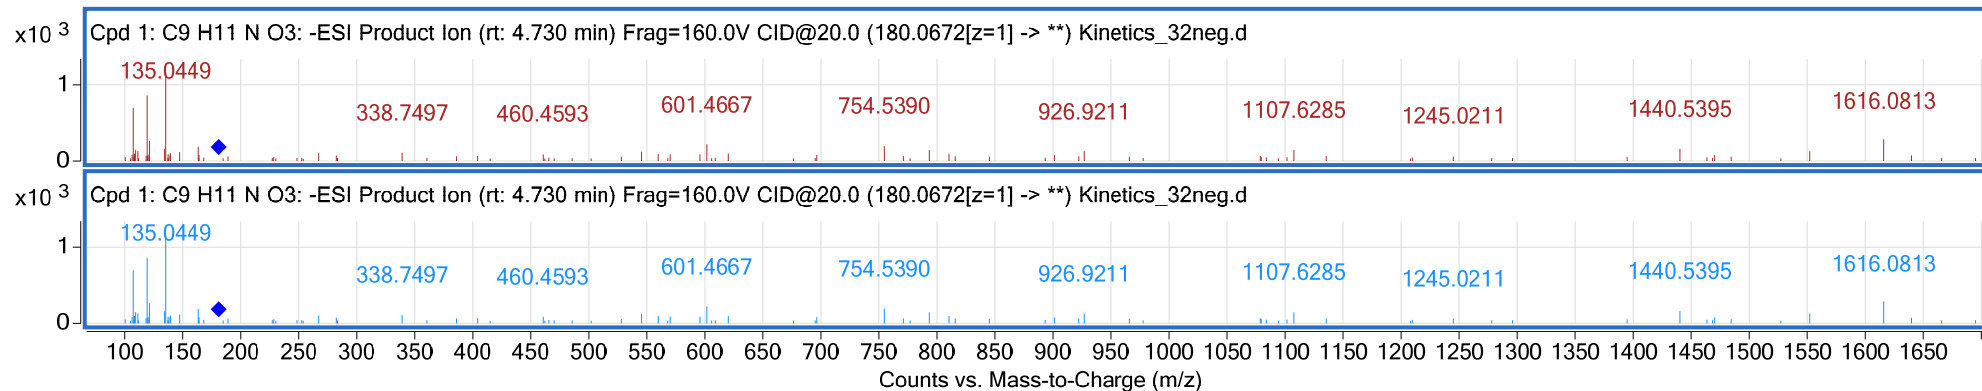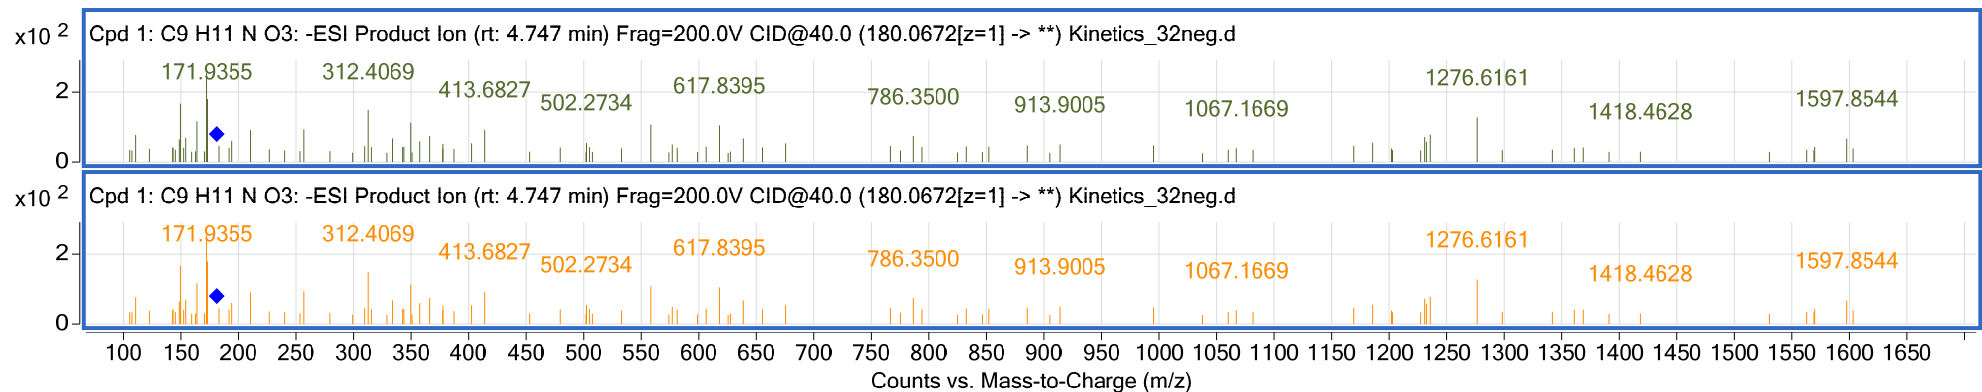

7. **C<sub>5</sub> H<sub>4</sub> O<sub>3</sub>, m/s- 111.0093, 3-Furoic acid**

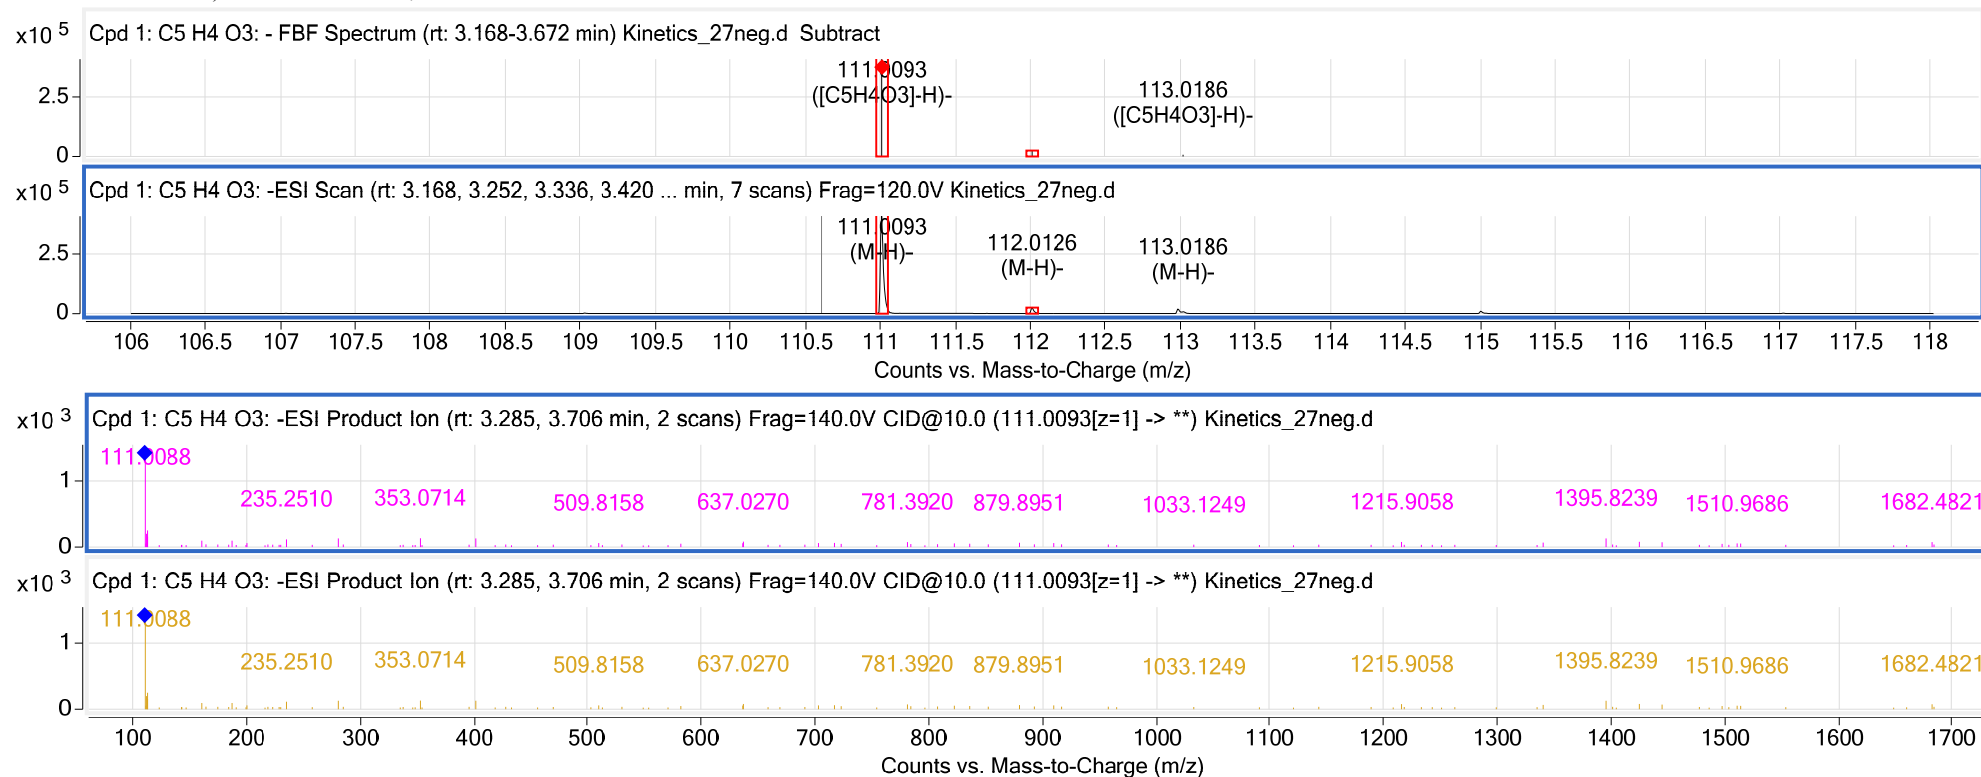

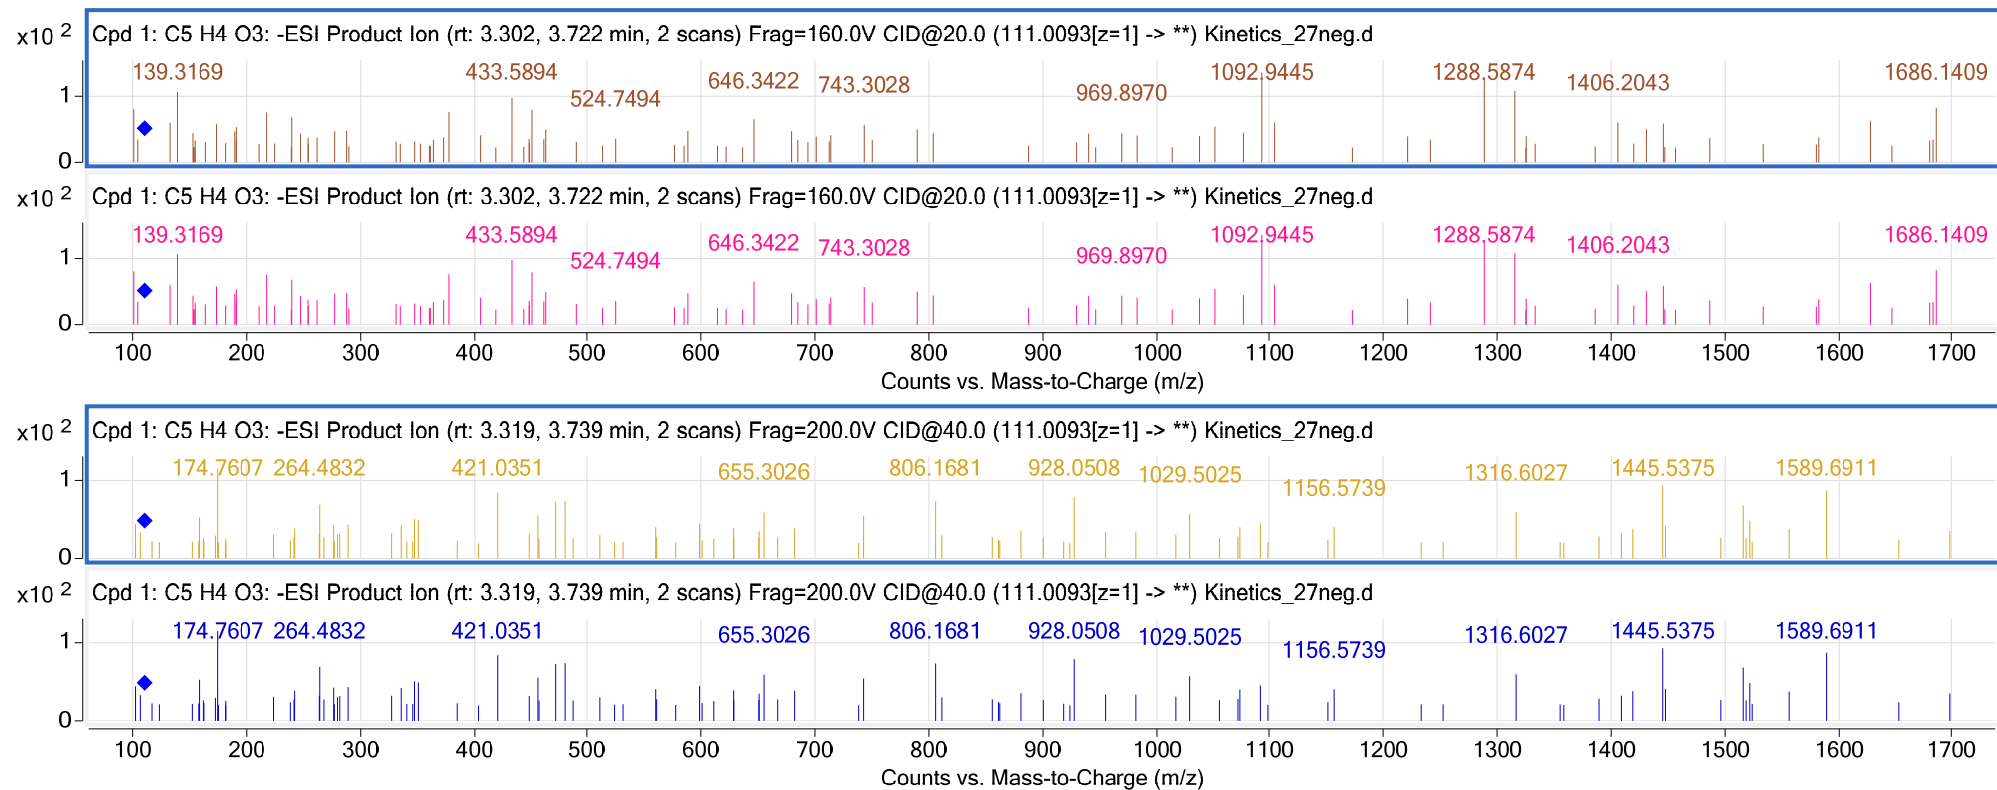

8.  $C_7H_{12}O_5$ , m/z-221.0675, 3-Isopropylmalic acid

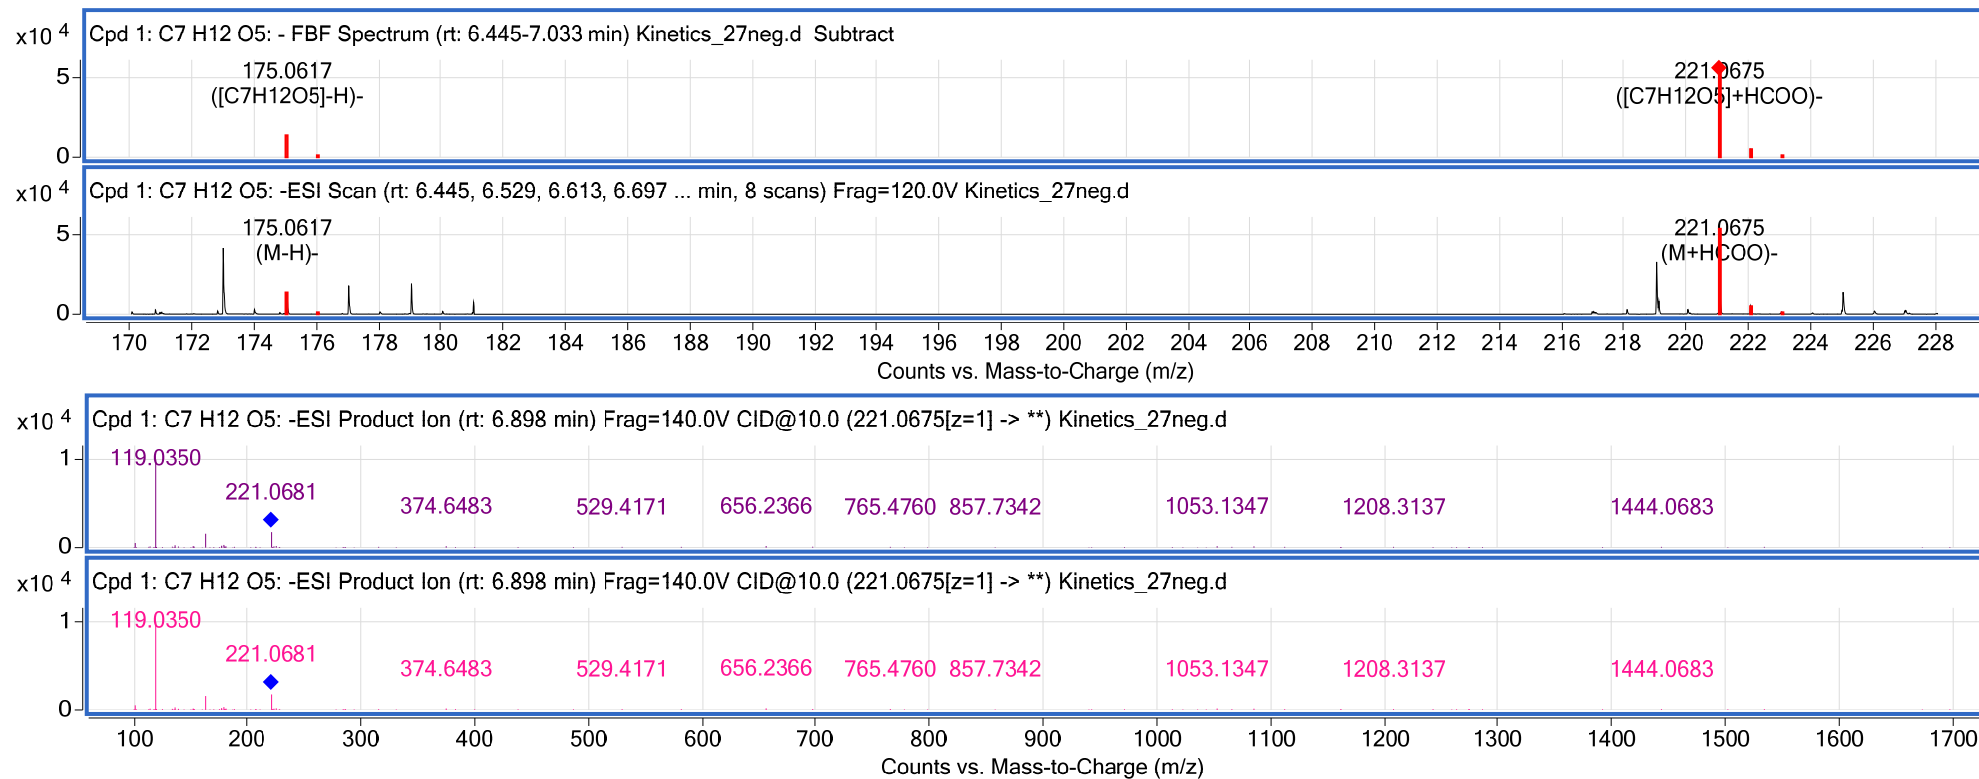

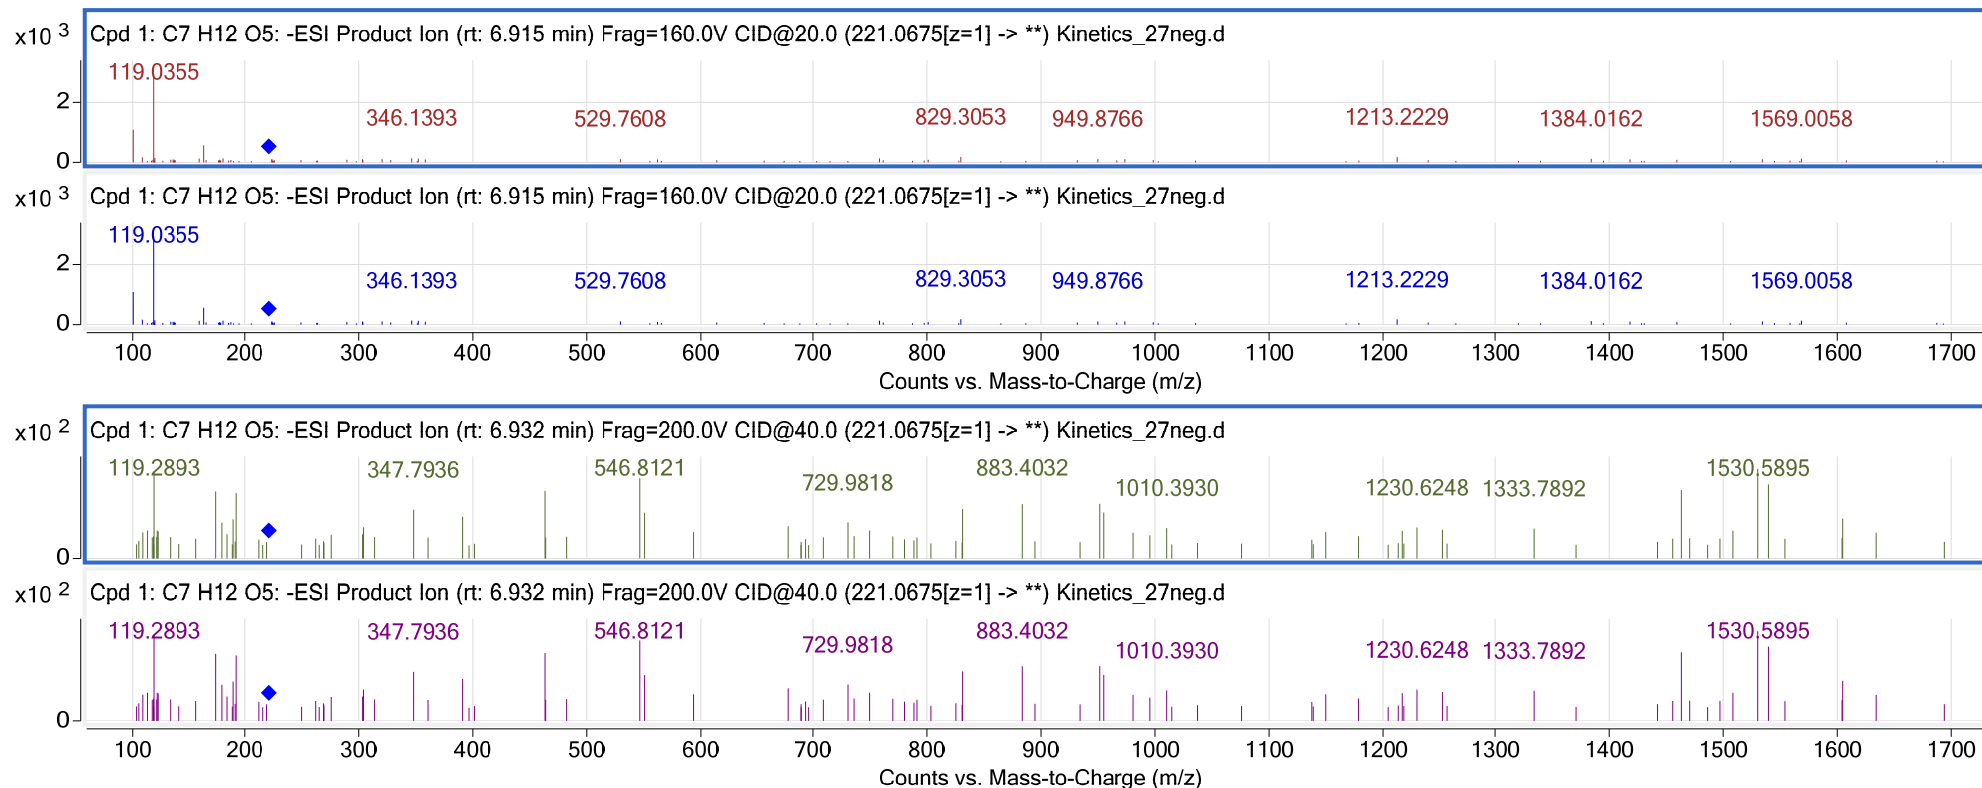

## 9. C<sub>6</sub>H<sub>6</sub>O<sub>6</sub>, m/z- 173.0097, Aconitic acid

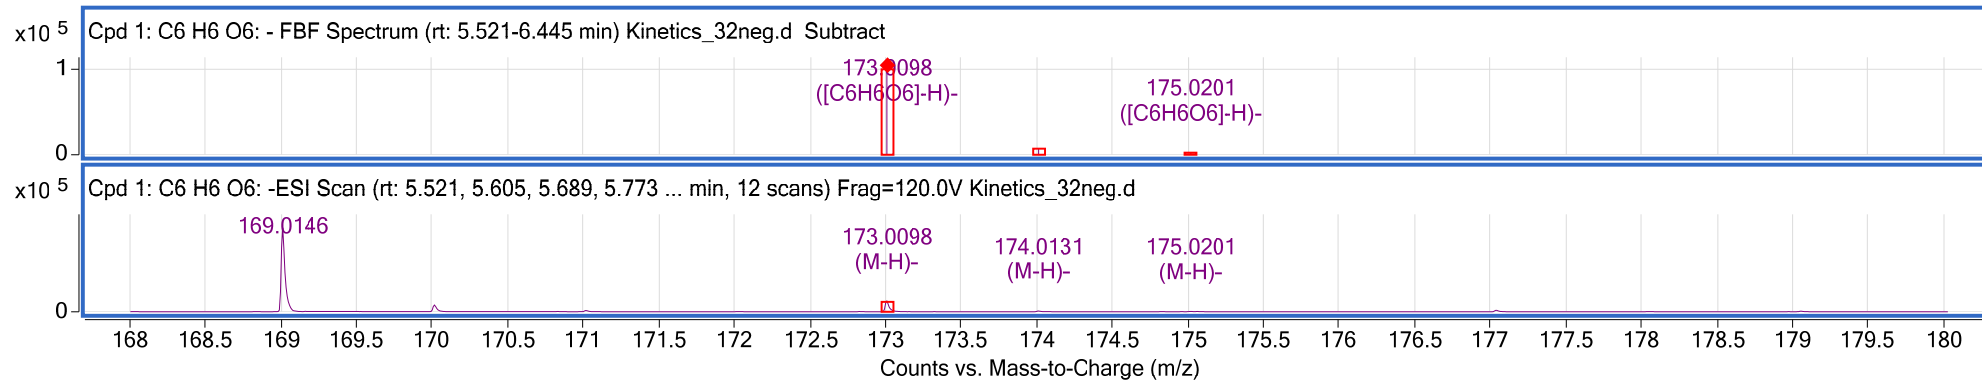

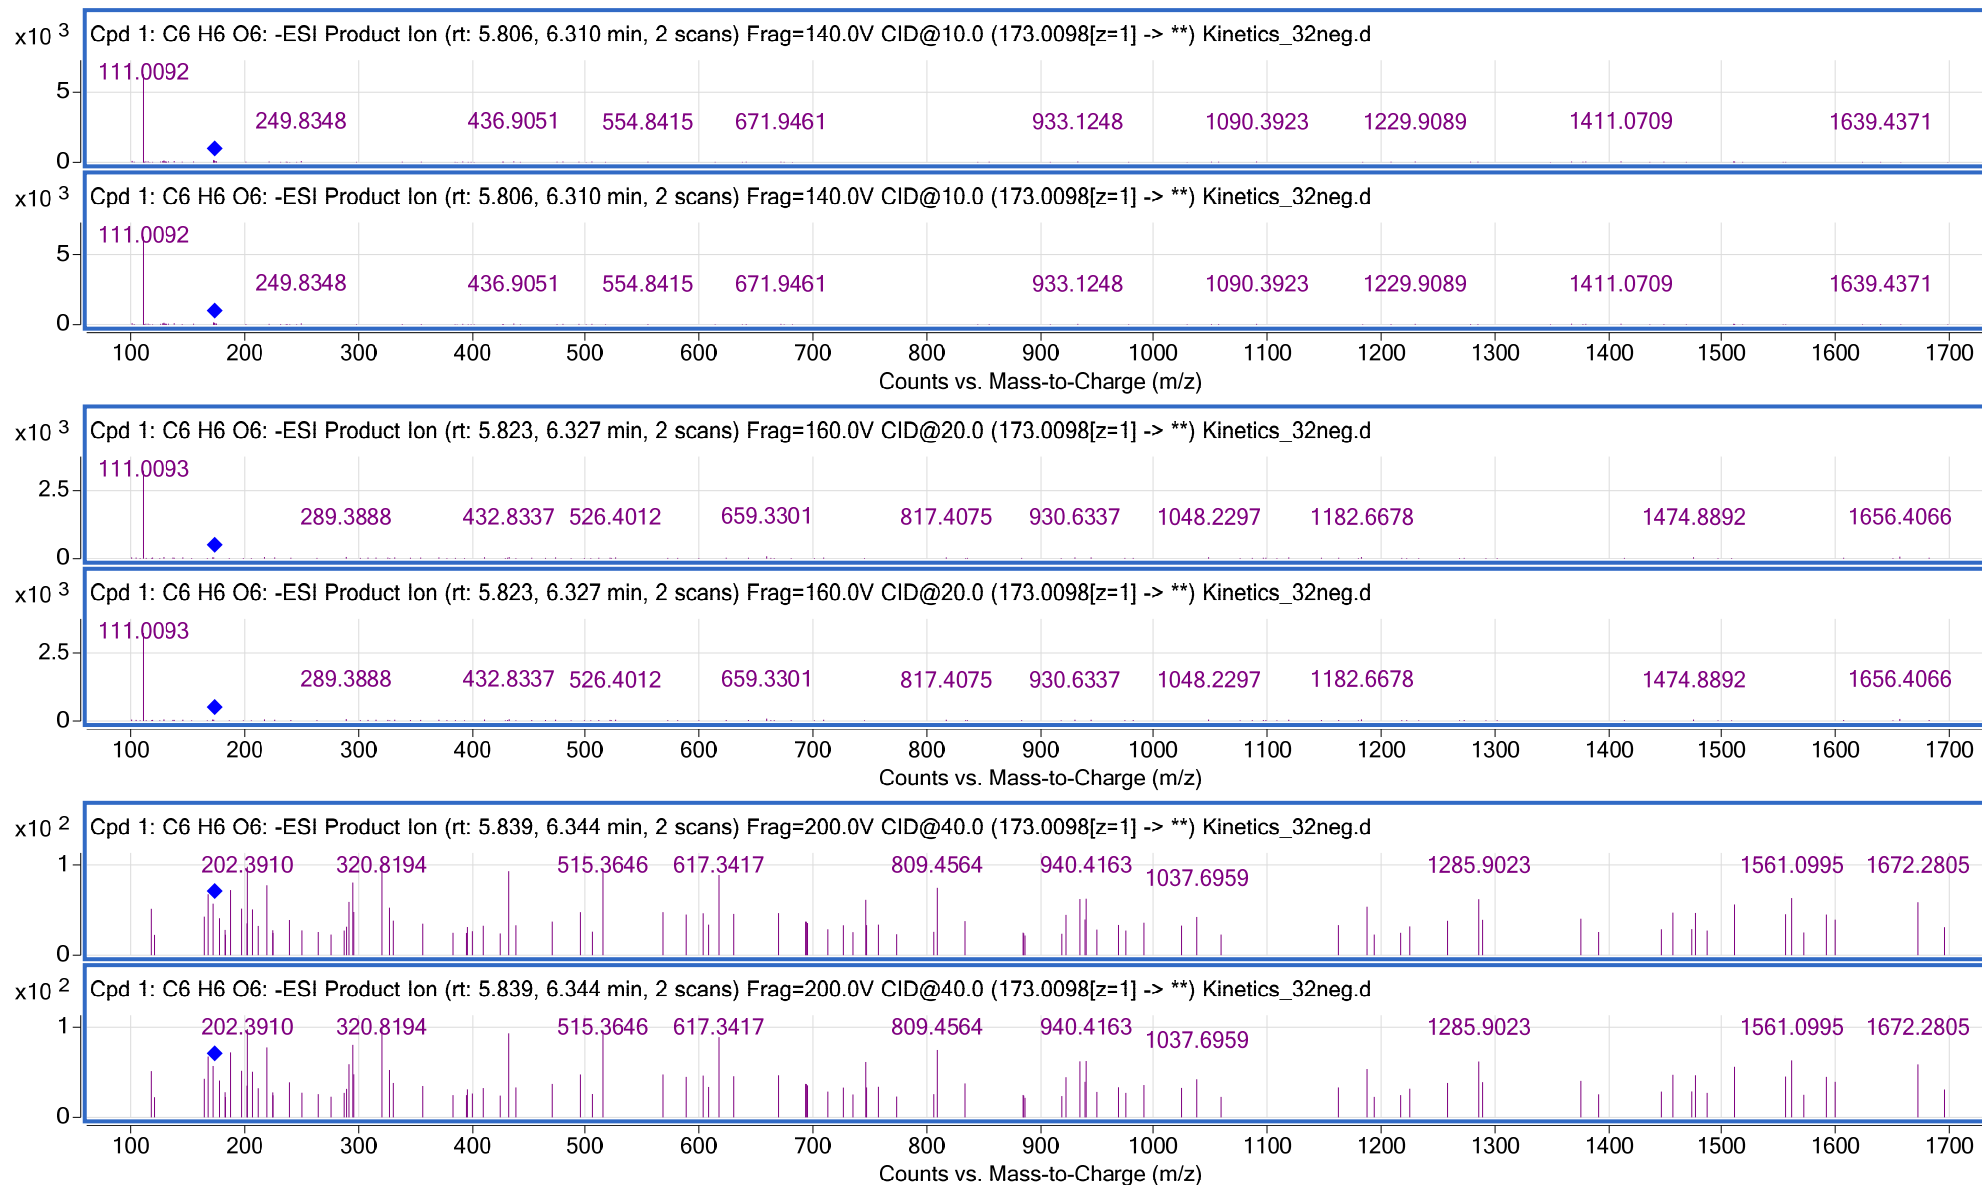

10. C<sub>7</sub>H<sub>6</sub>O<sub>2</sub>, m/z-121.03, Benzoic acid

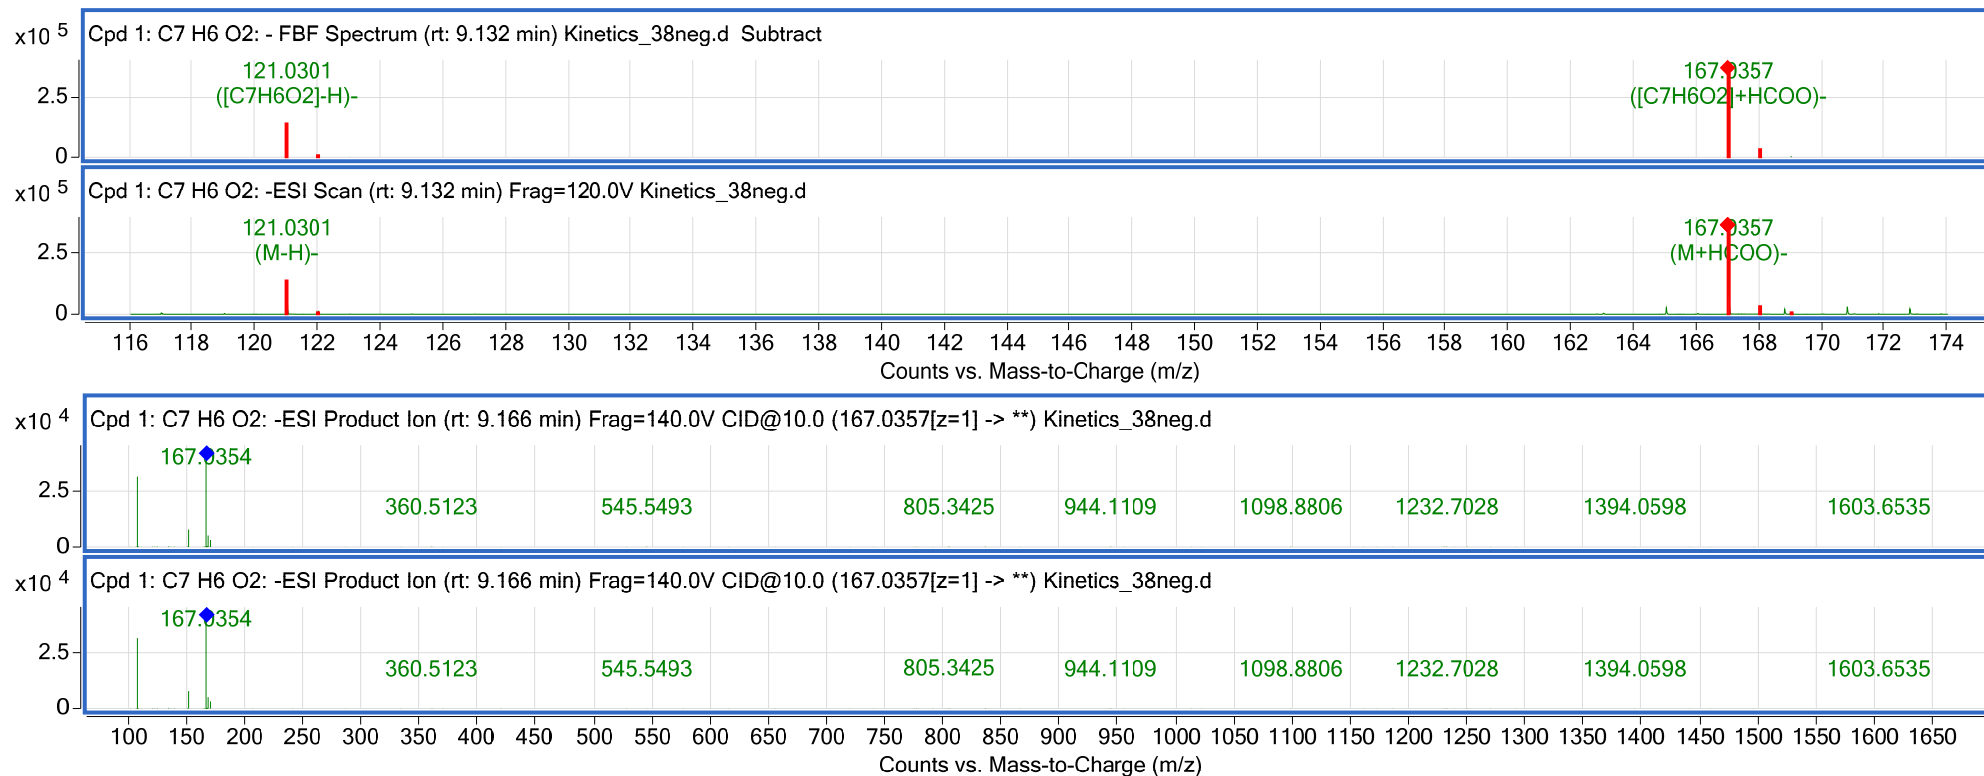

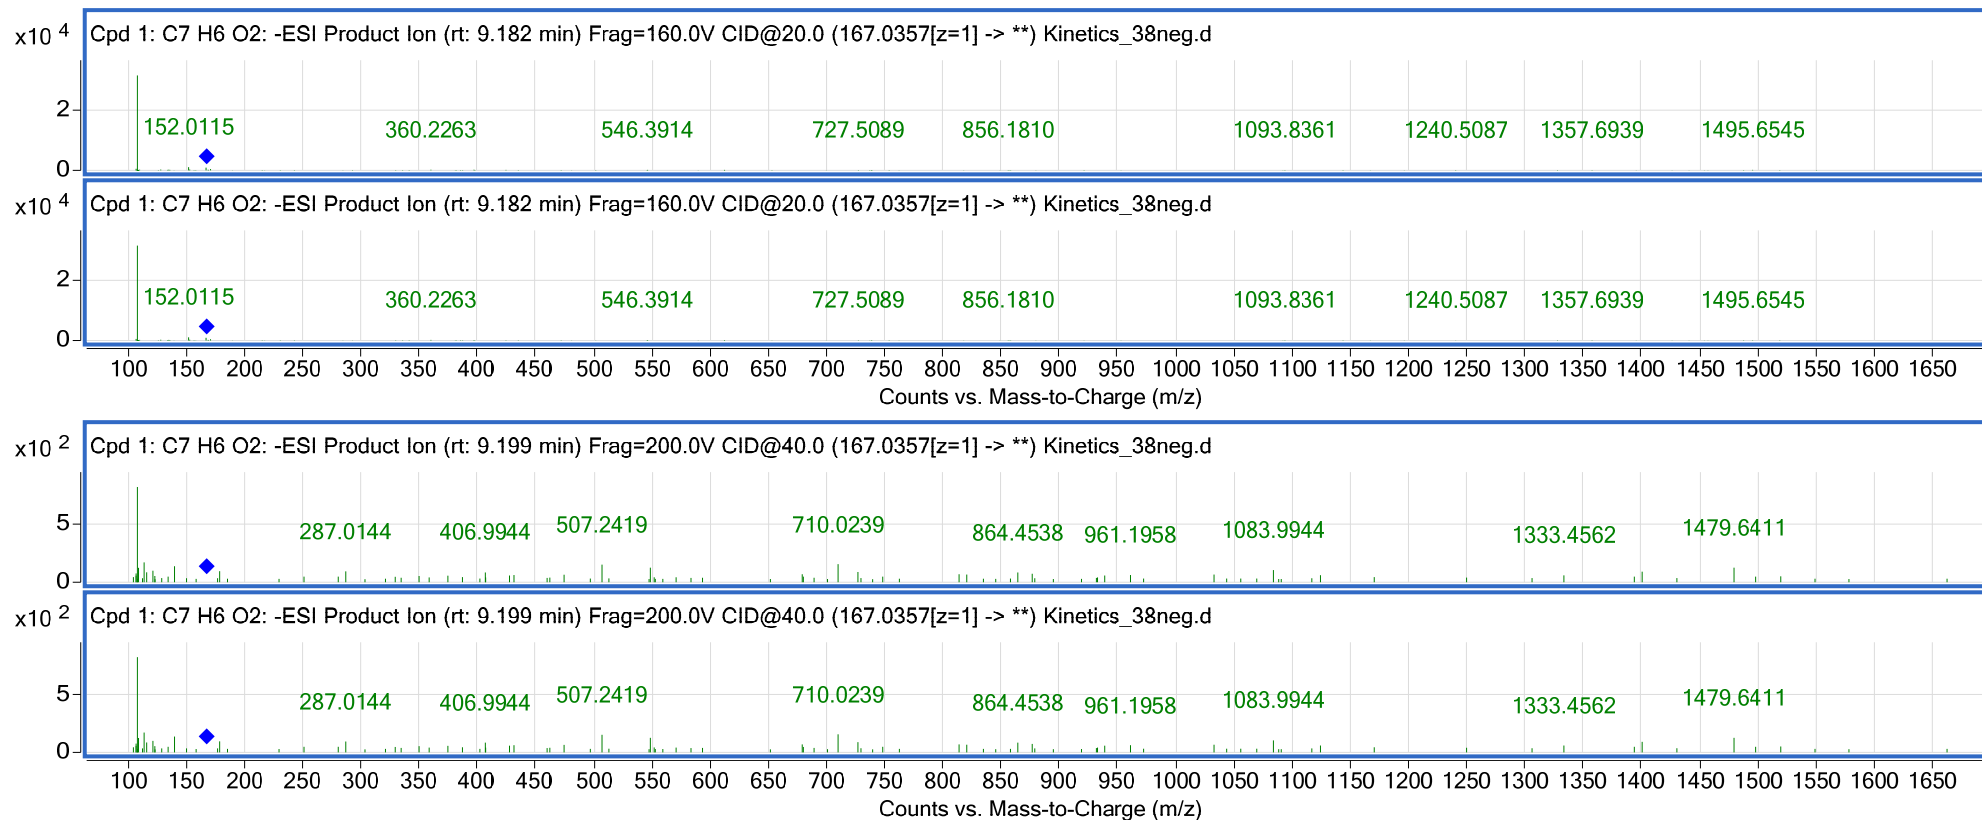

# 11. C<sub>28</sub> H<sub>40</sub> O<sub>4</sub>, m/z-439.2854, Bolegrevilol

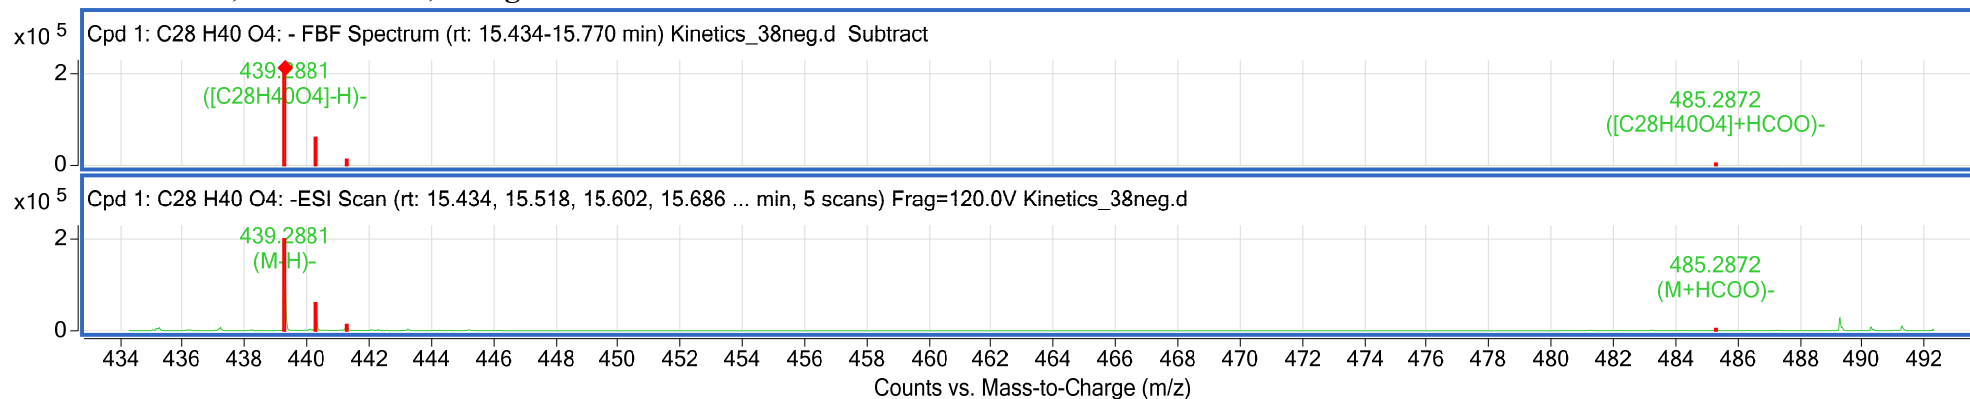



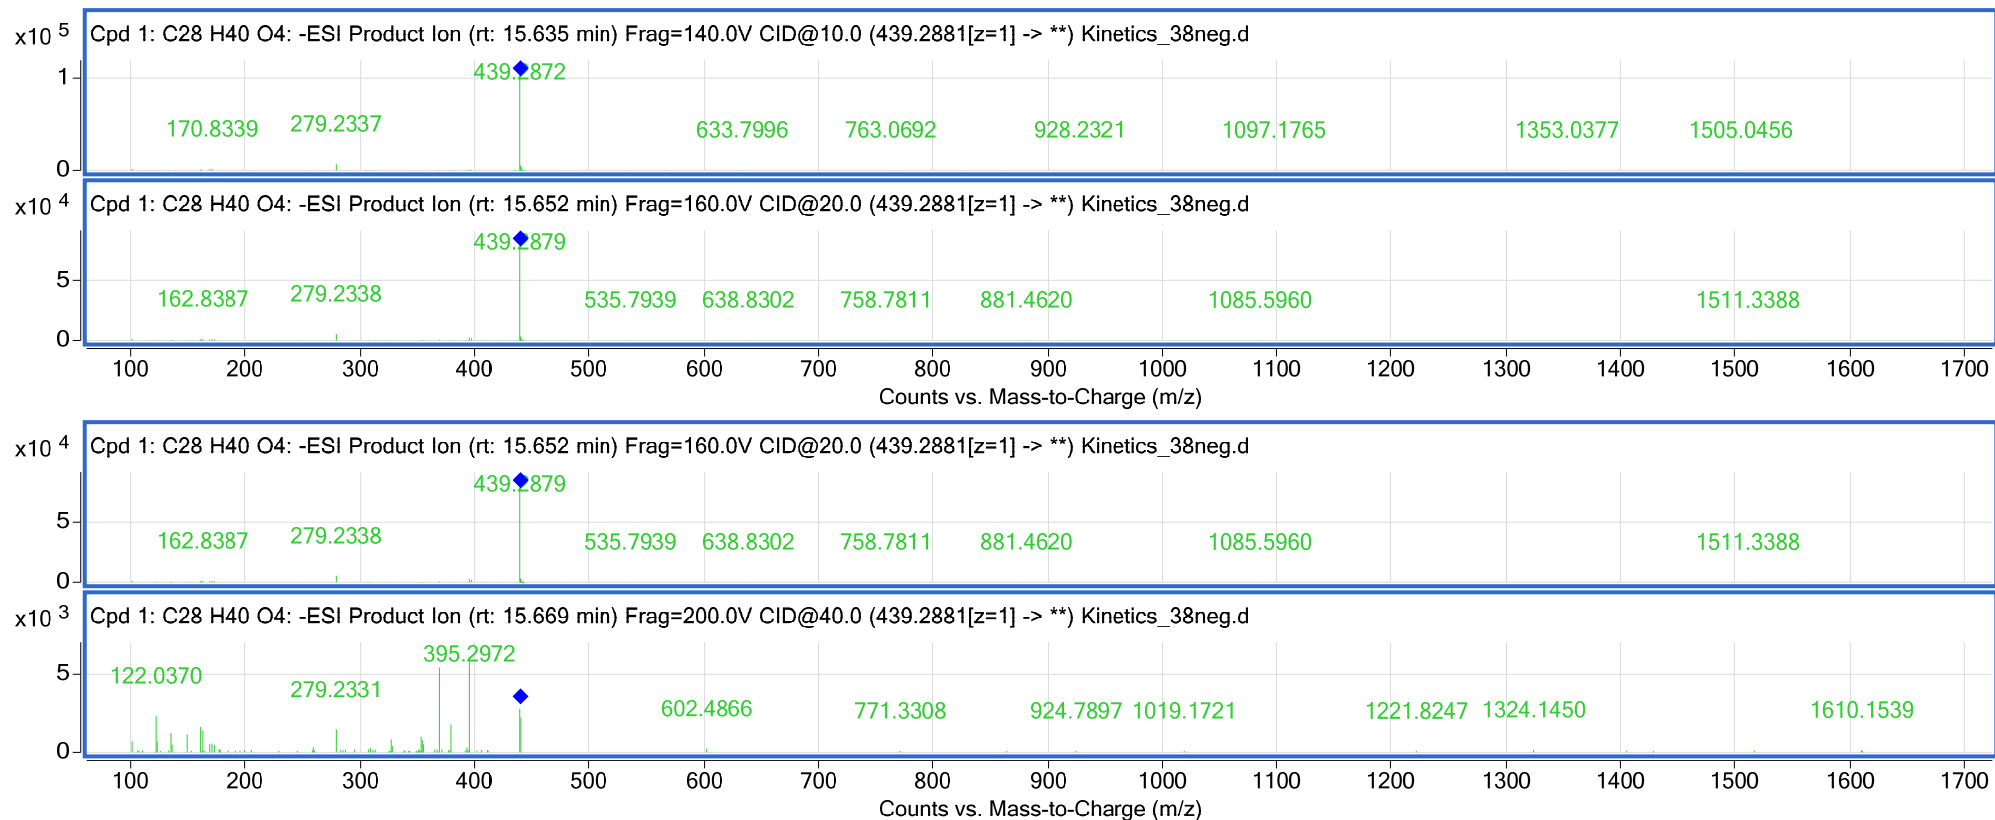

## 12. C<sub>6</sub> H<sub>8</sub> O<sub>7</sub>, m/z-191.0201, Citric acid

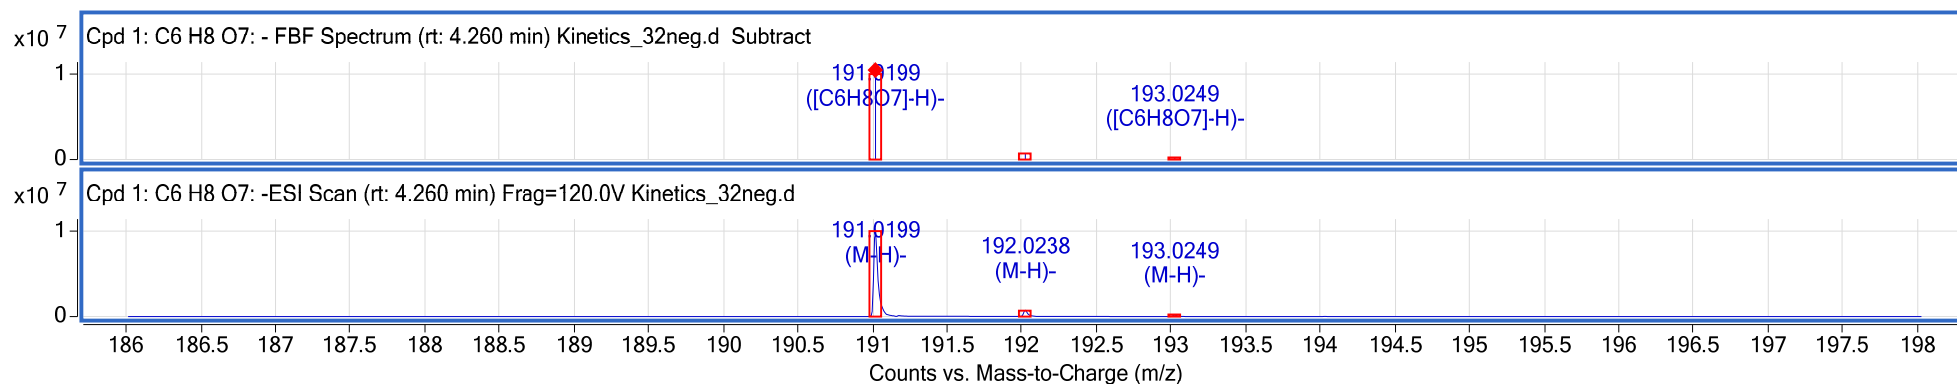

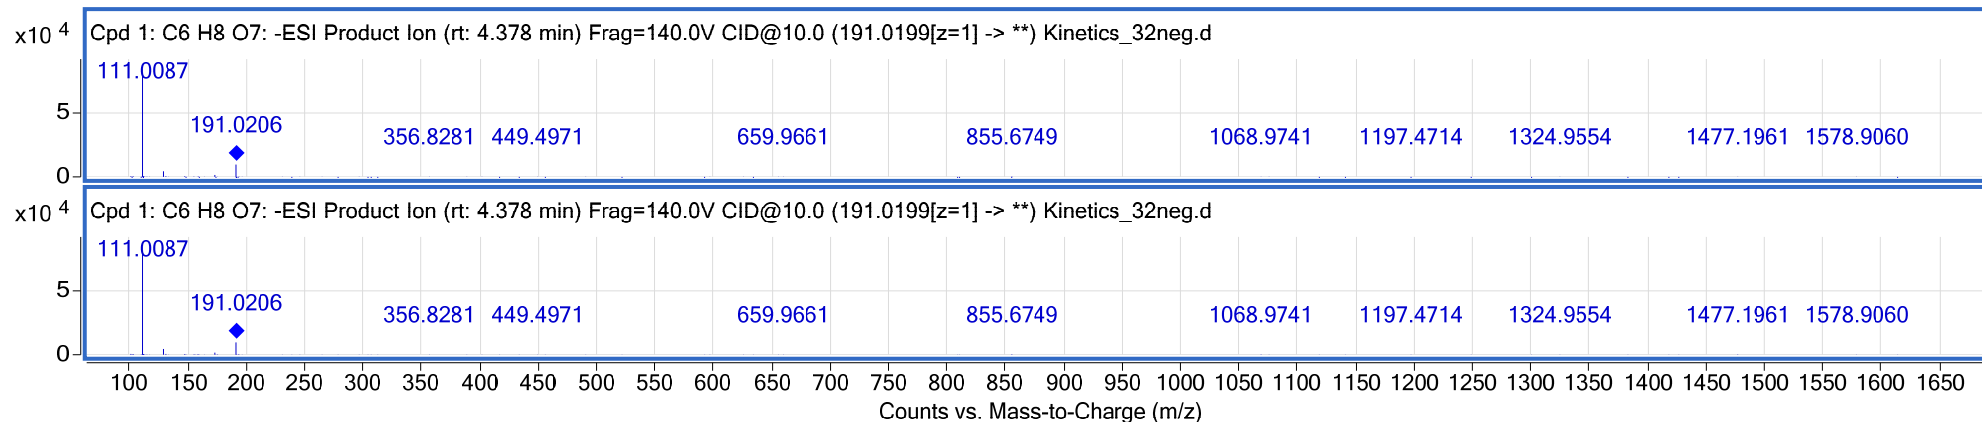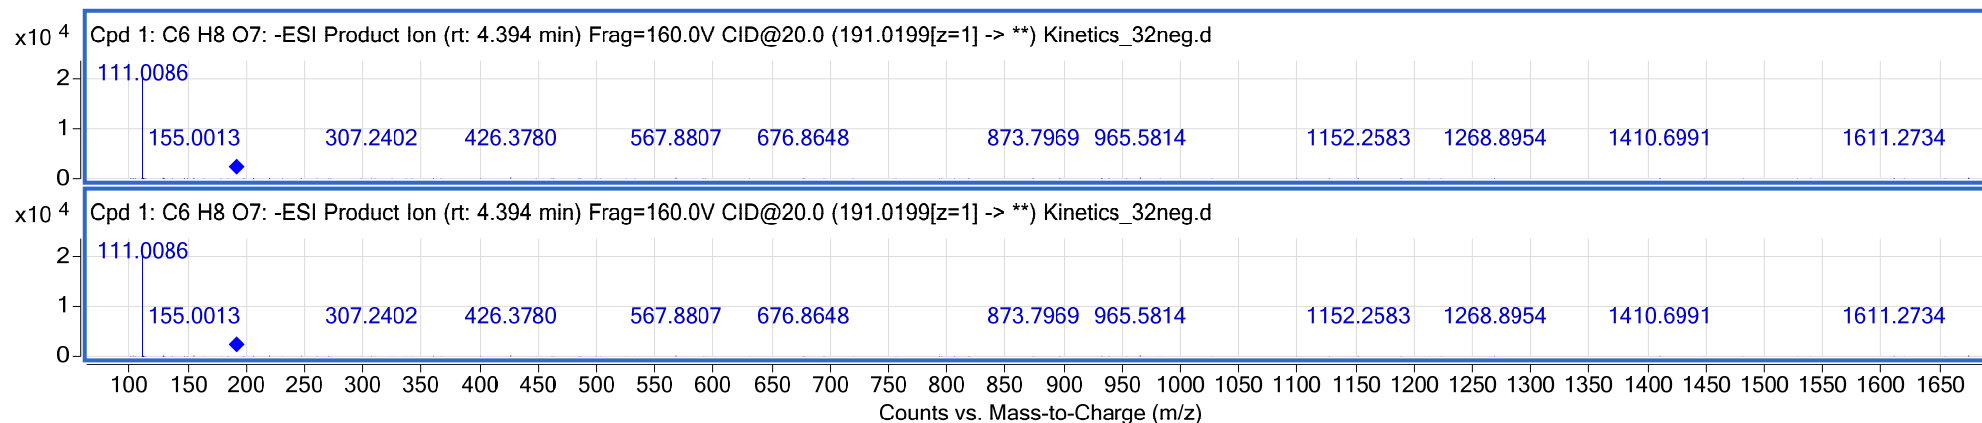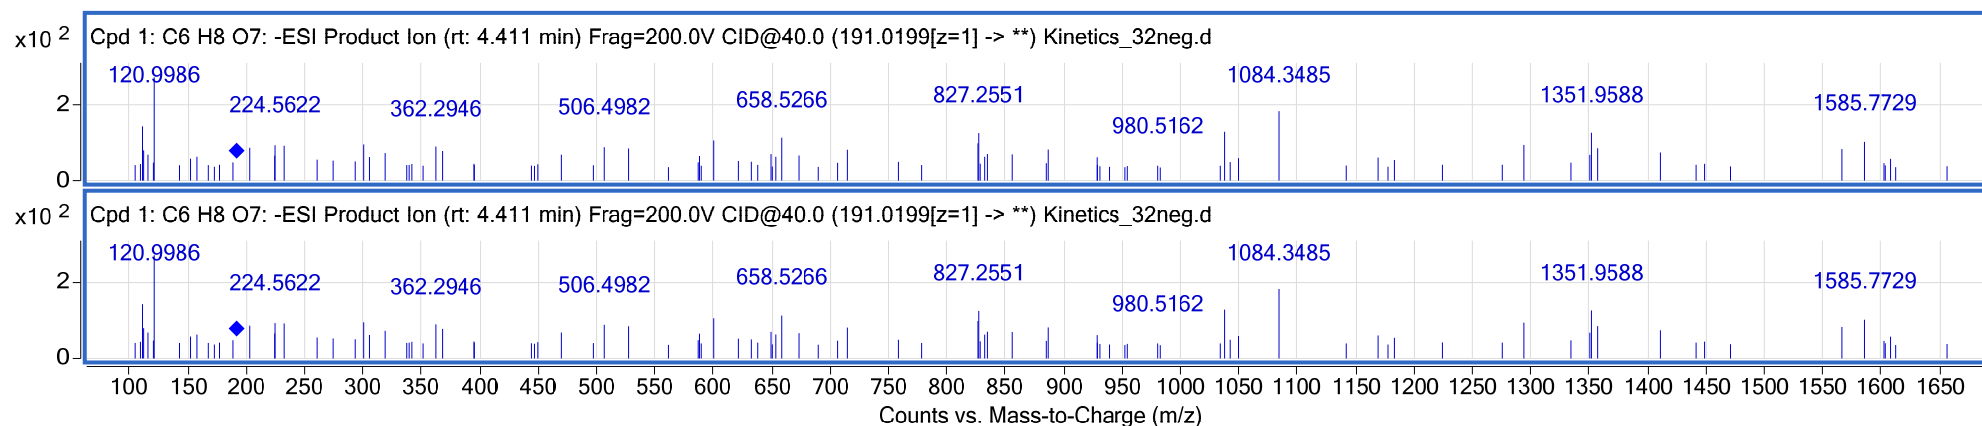

### 13. $\text{C}_9\text{H}_8\text{O}_3$ , m/z-163.04, Coumaric acid

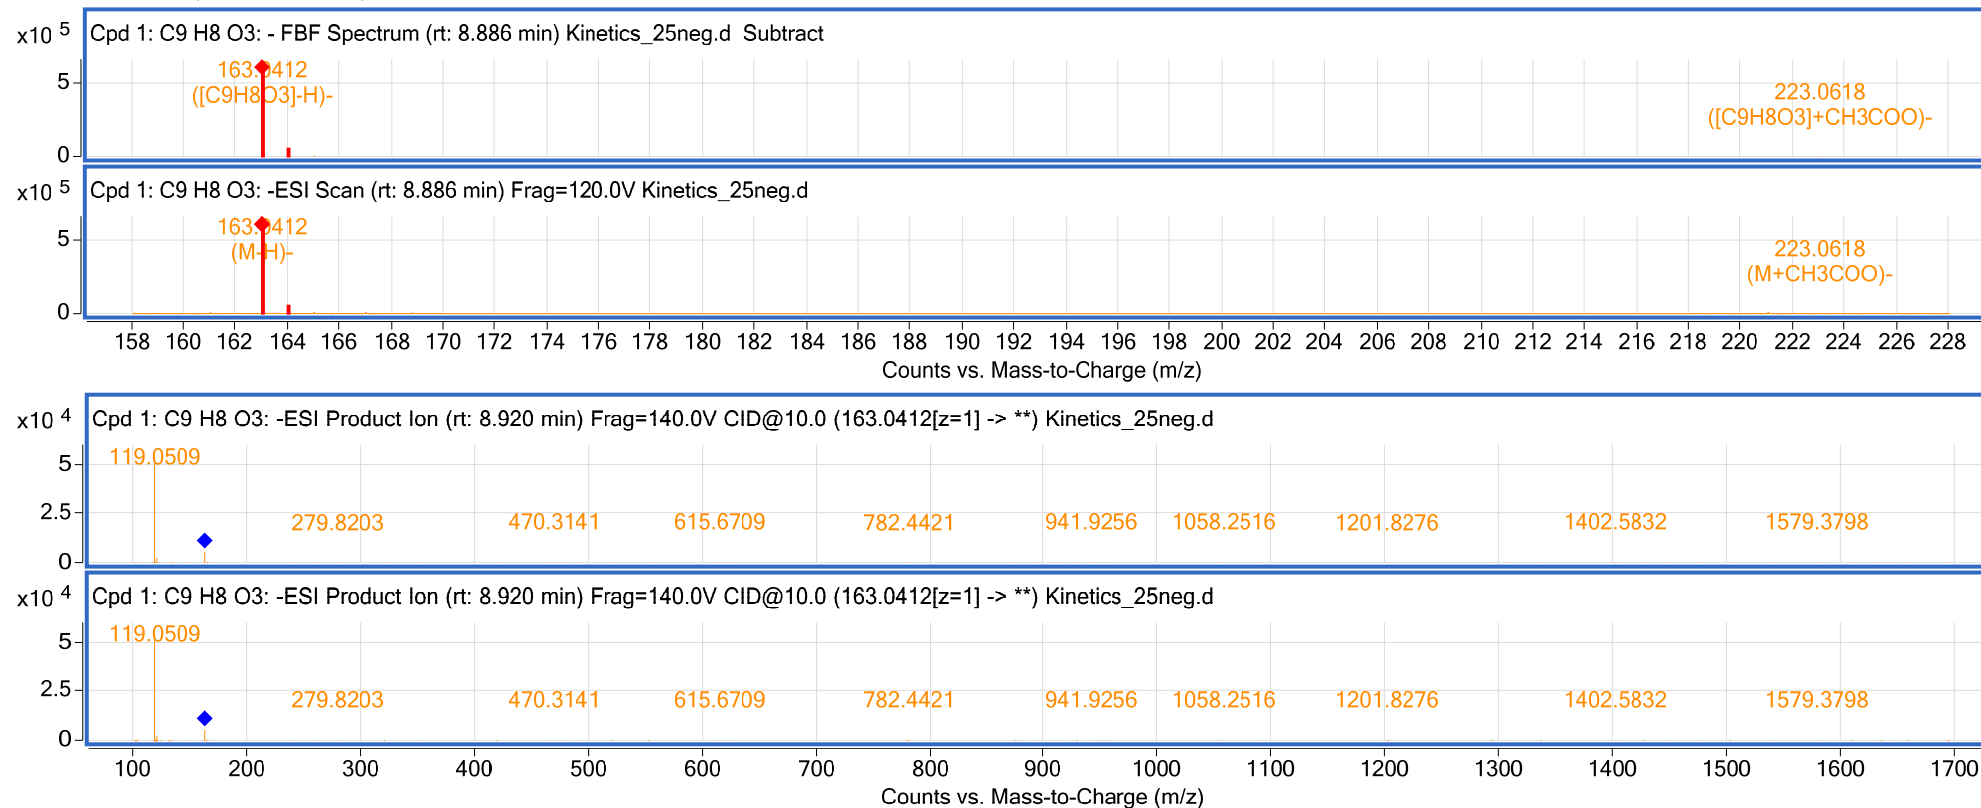

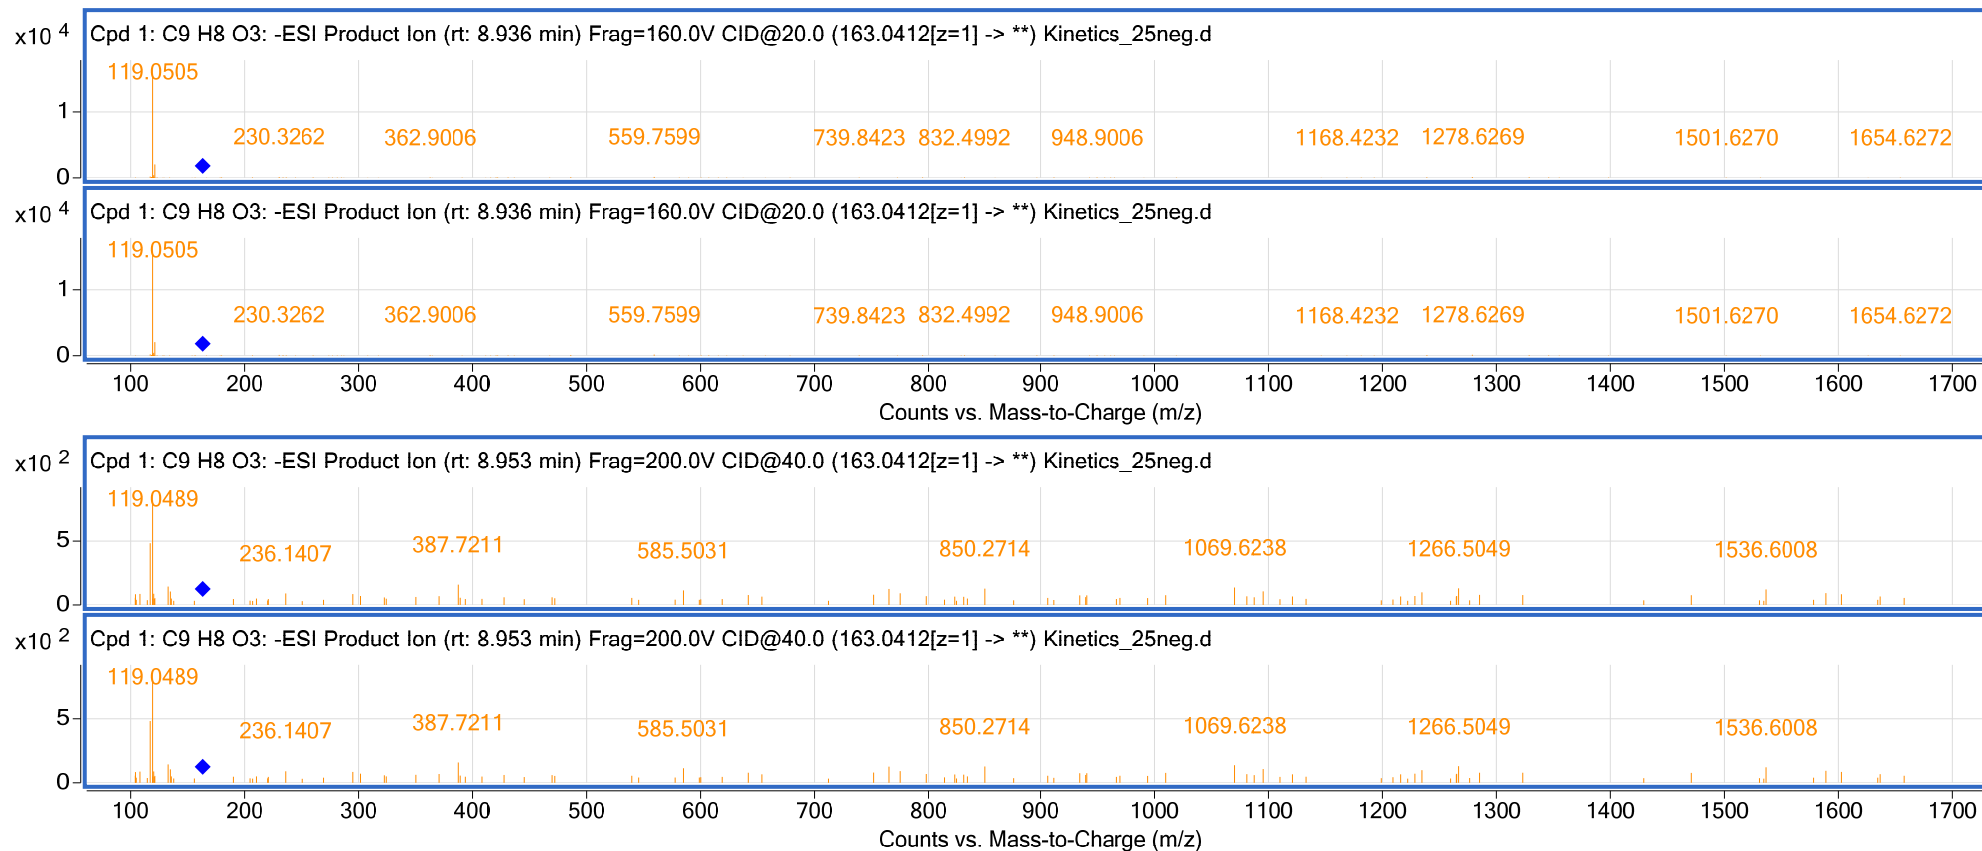

#### 14. C<sub>10</sub> H<sub>18</sub> O<sub>4</sub>, m/z-201.1143, Decanedioic acid

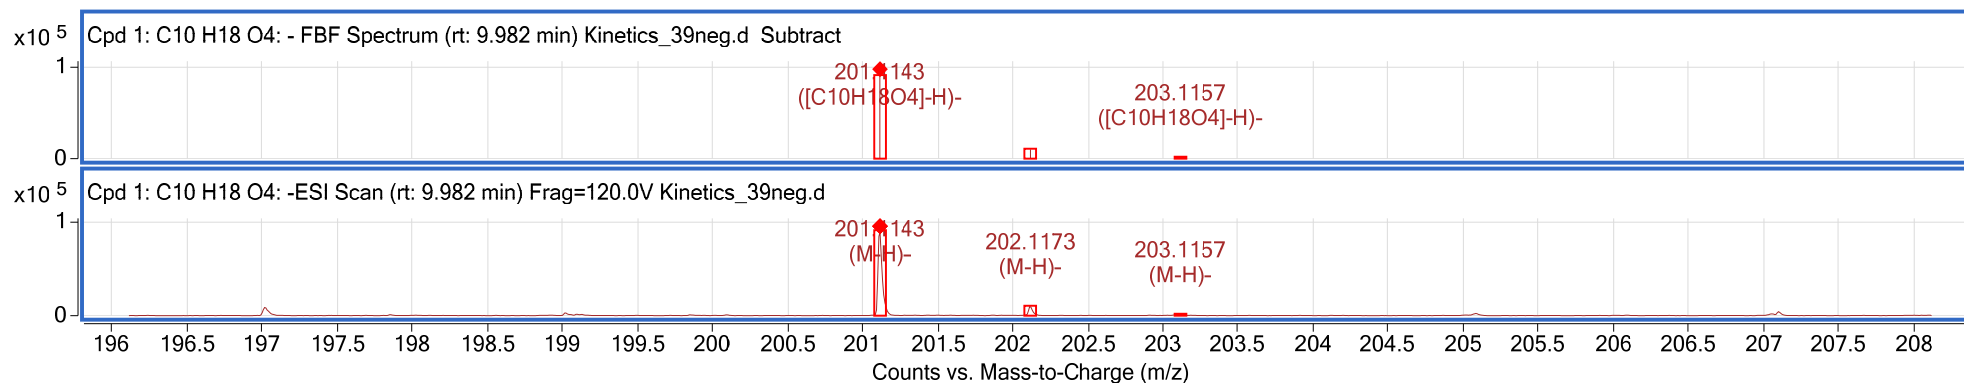

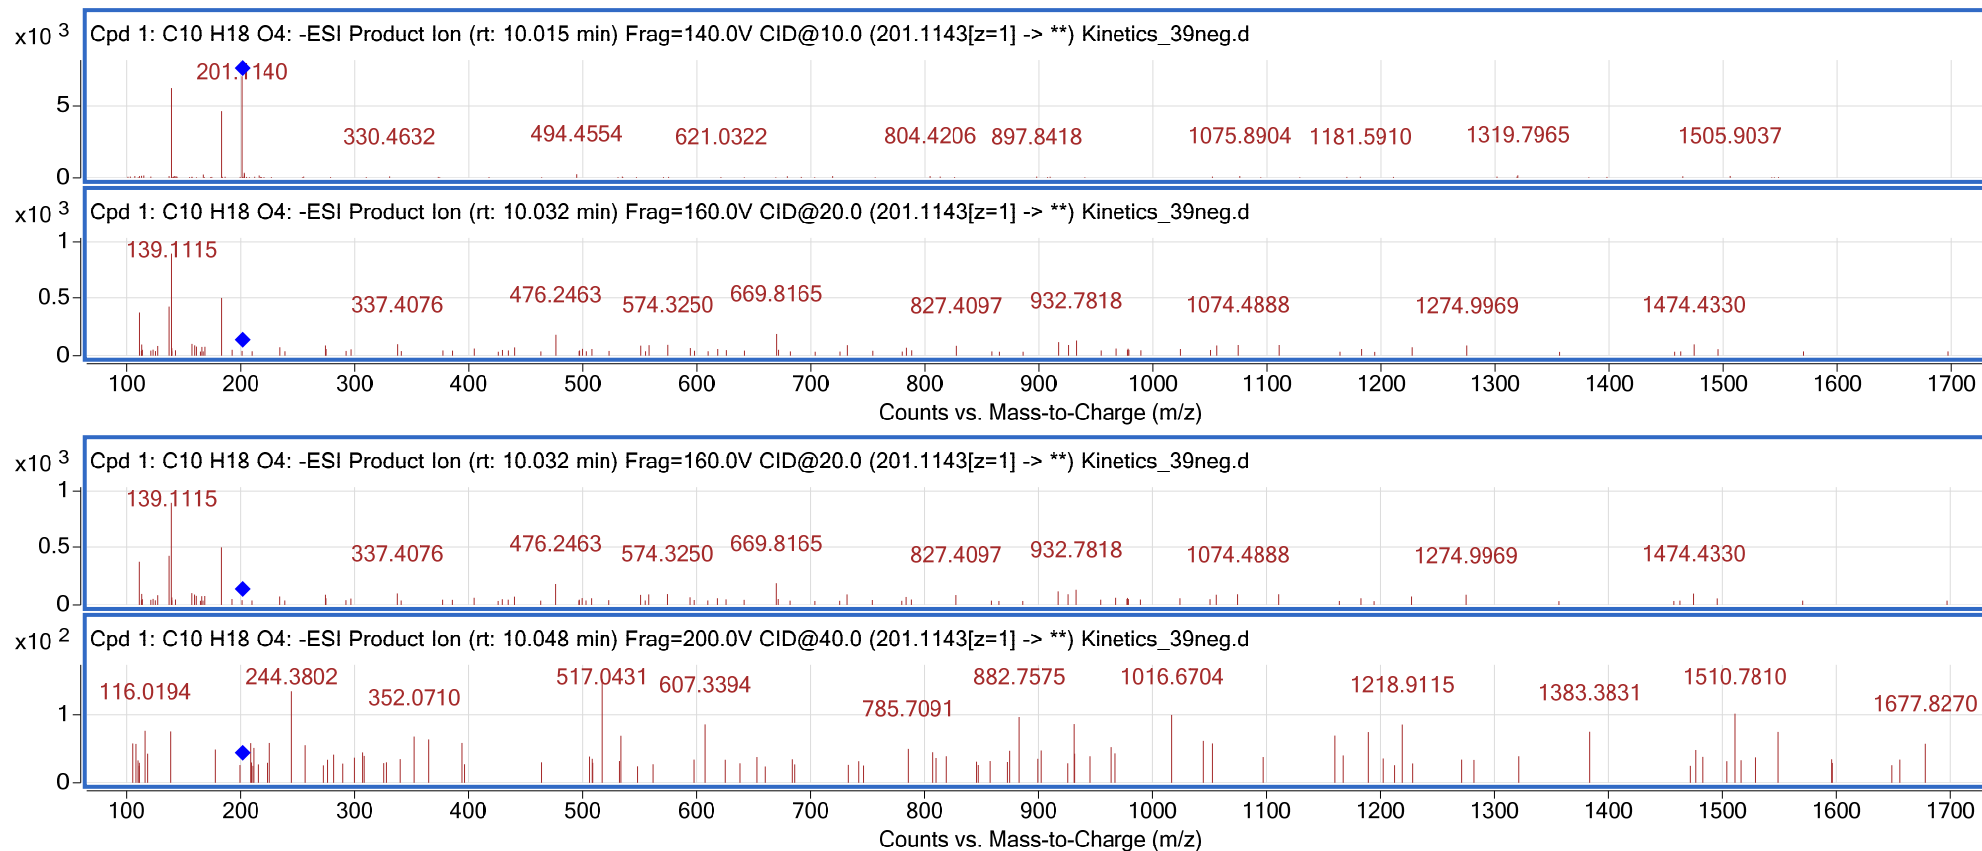

**15. C<sub>13</sub> H<sub>24</sub> O<sub>2</sub>, m/z-271.1918, Delta-tridecalactone**

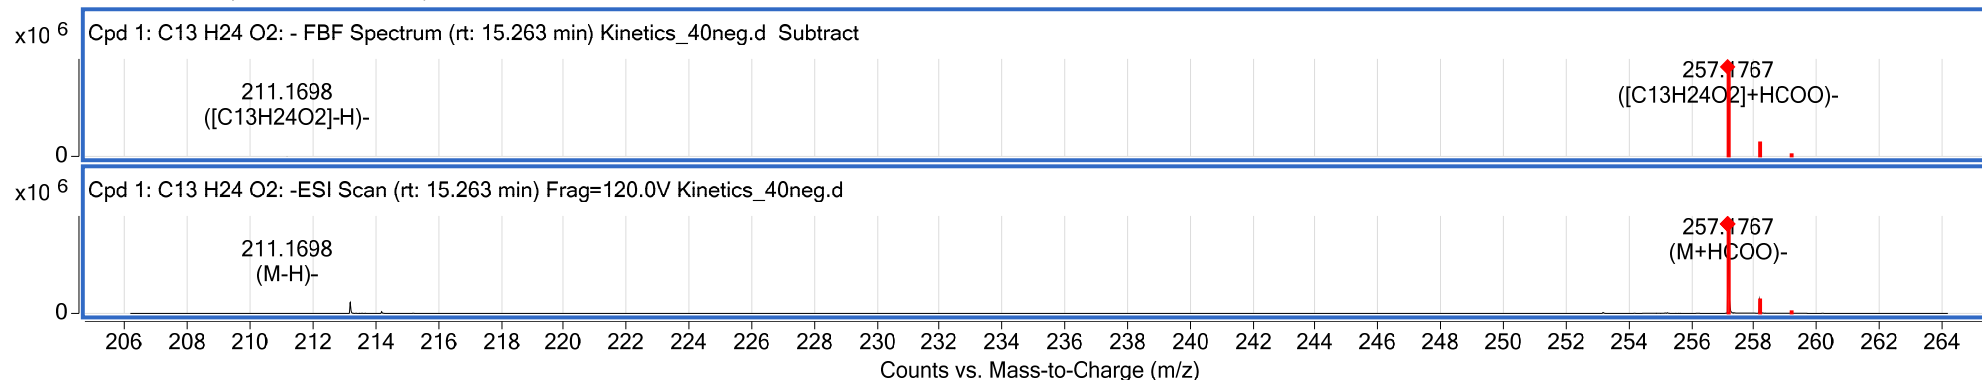

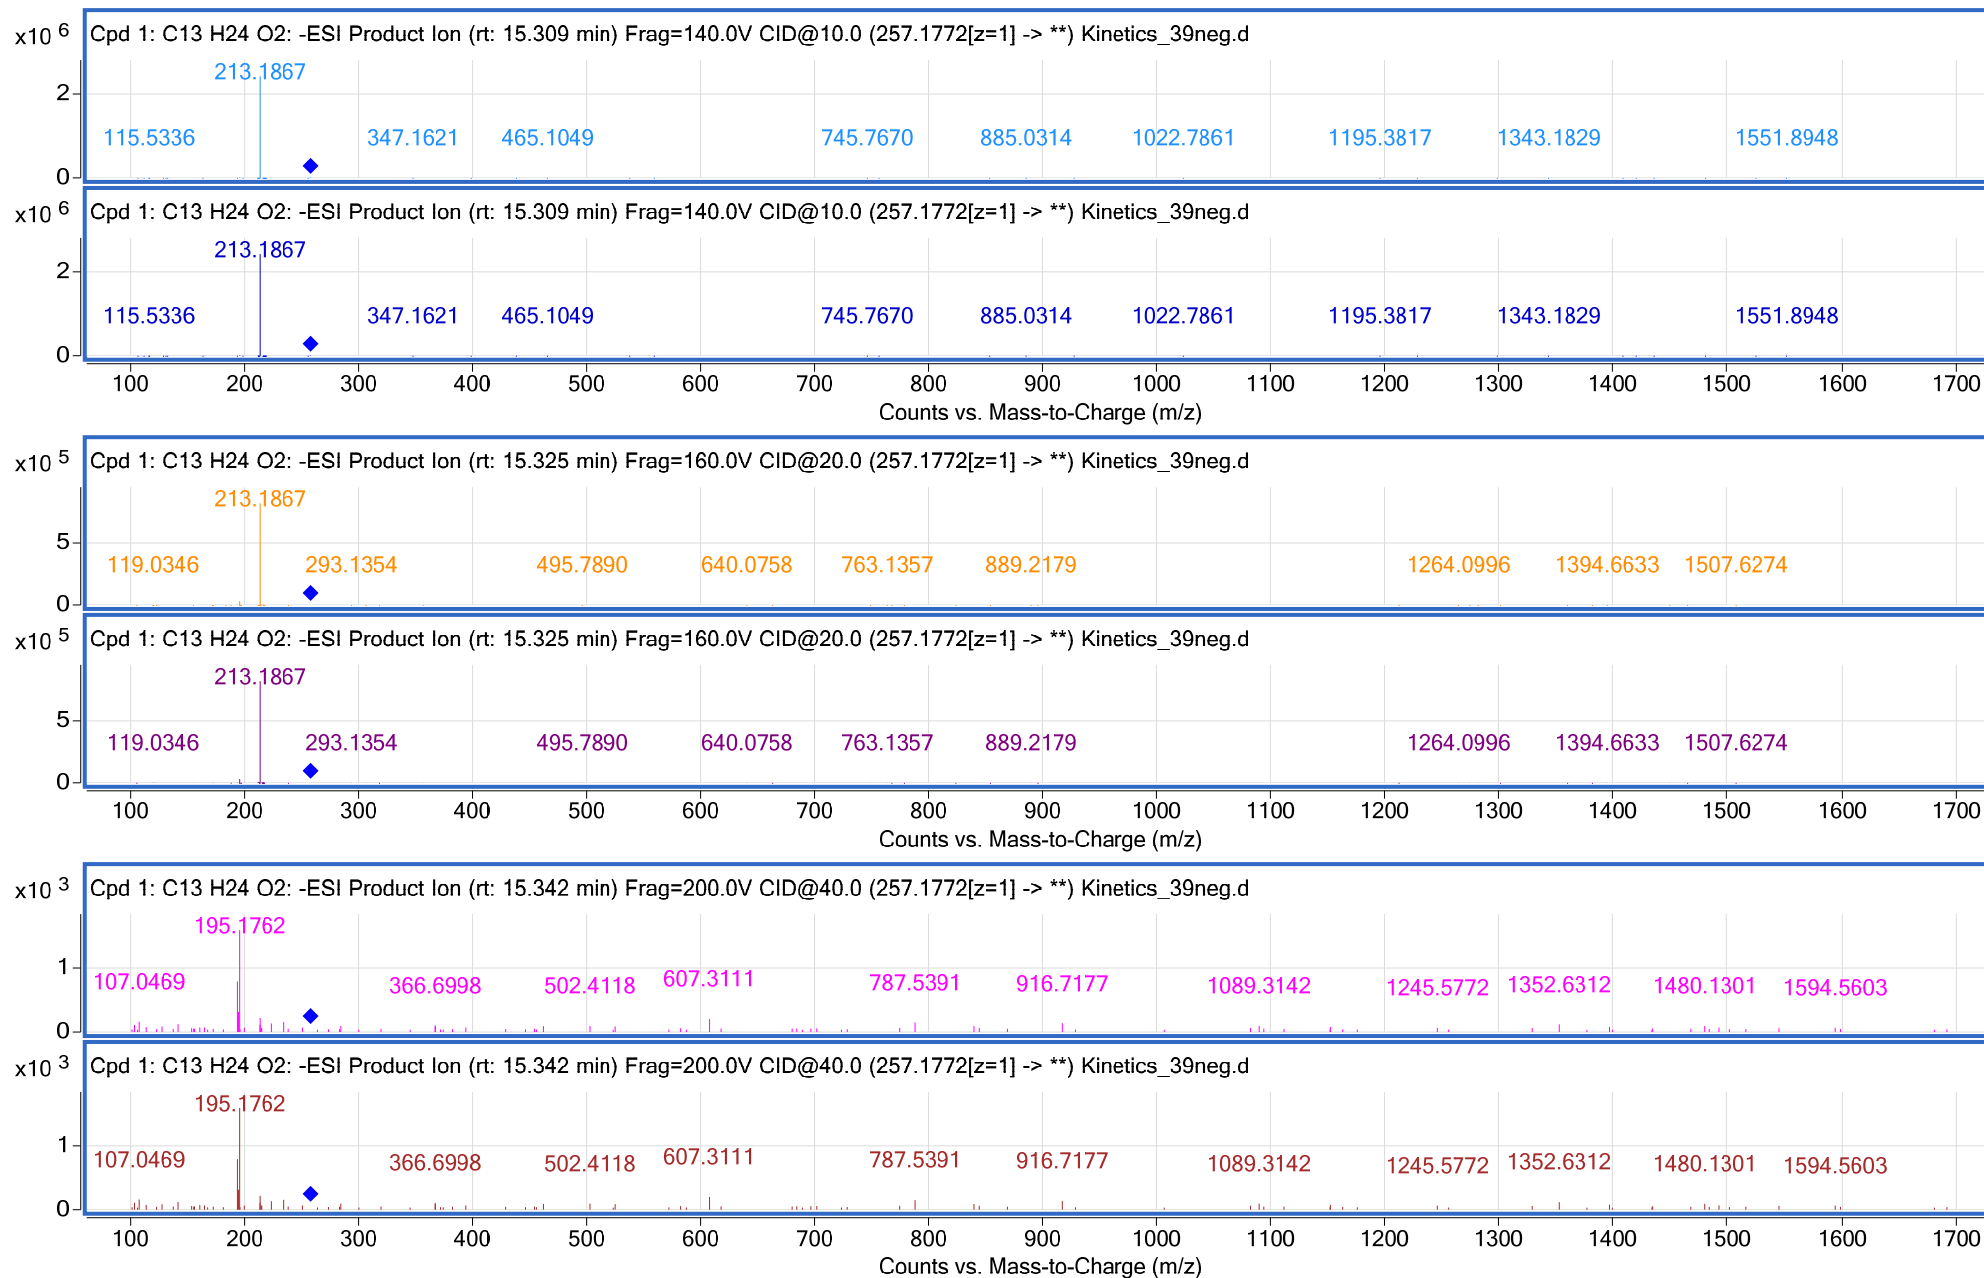

16.  $C_6H_{10}S_2$ , m/z-191.0199, Di-2-propenyl disulfide

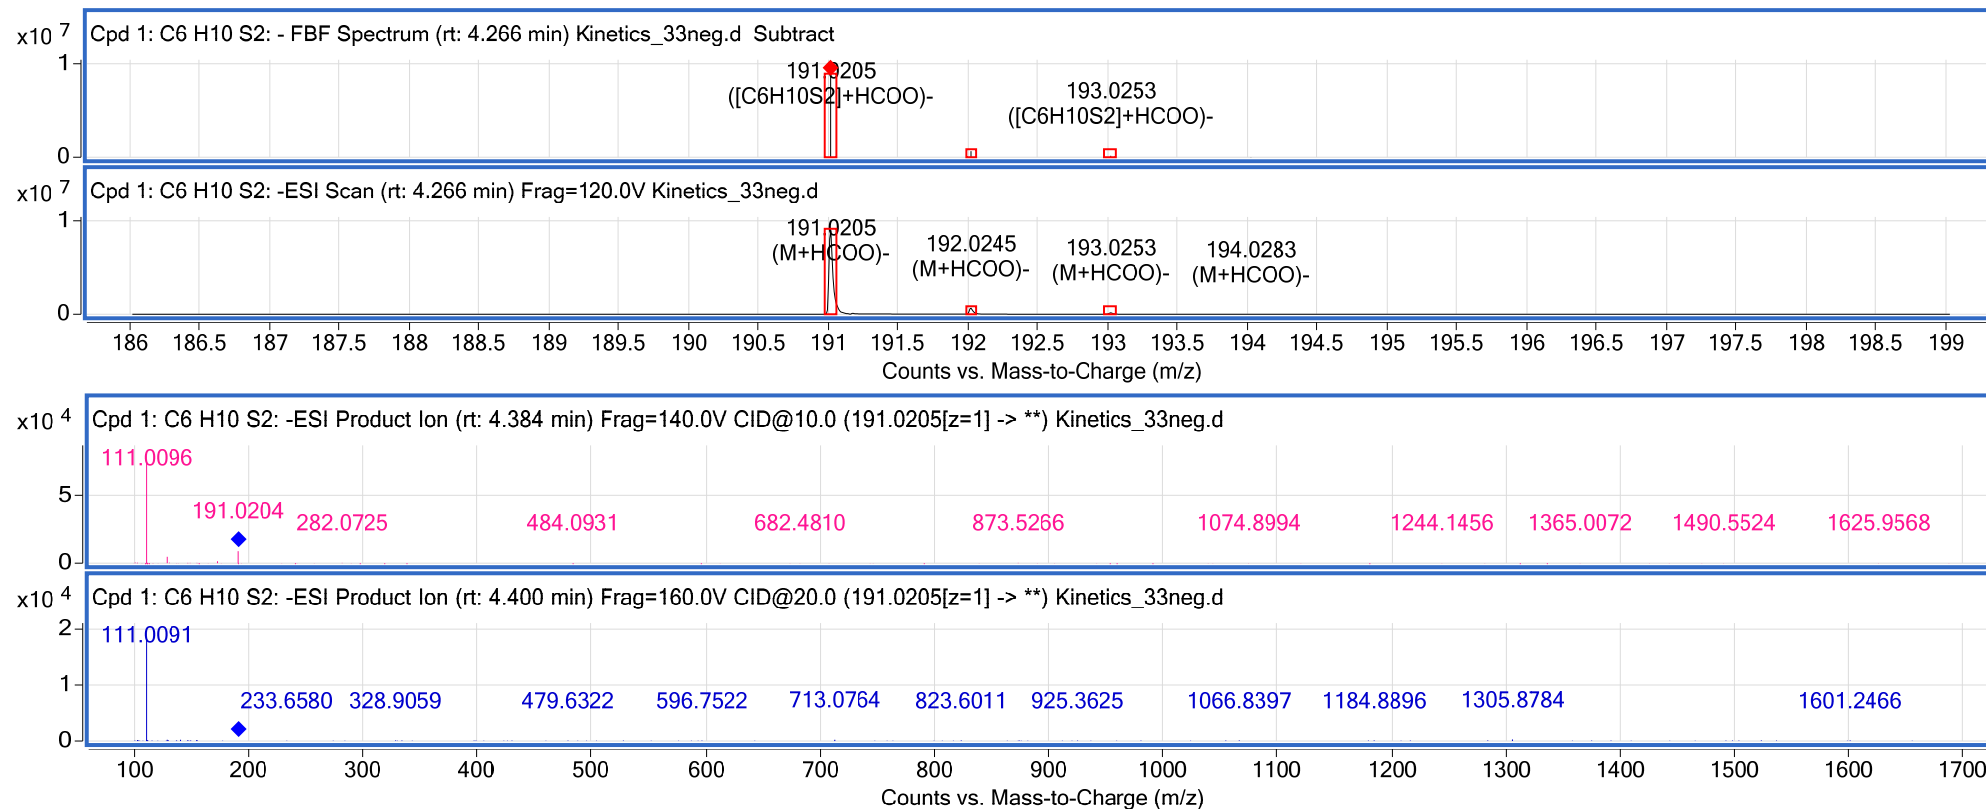

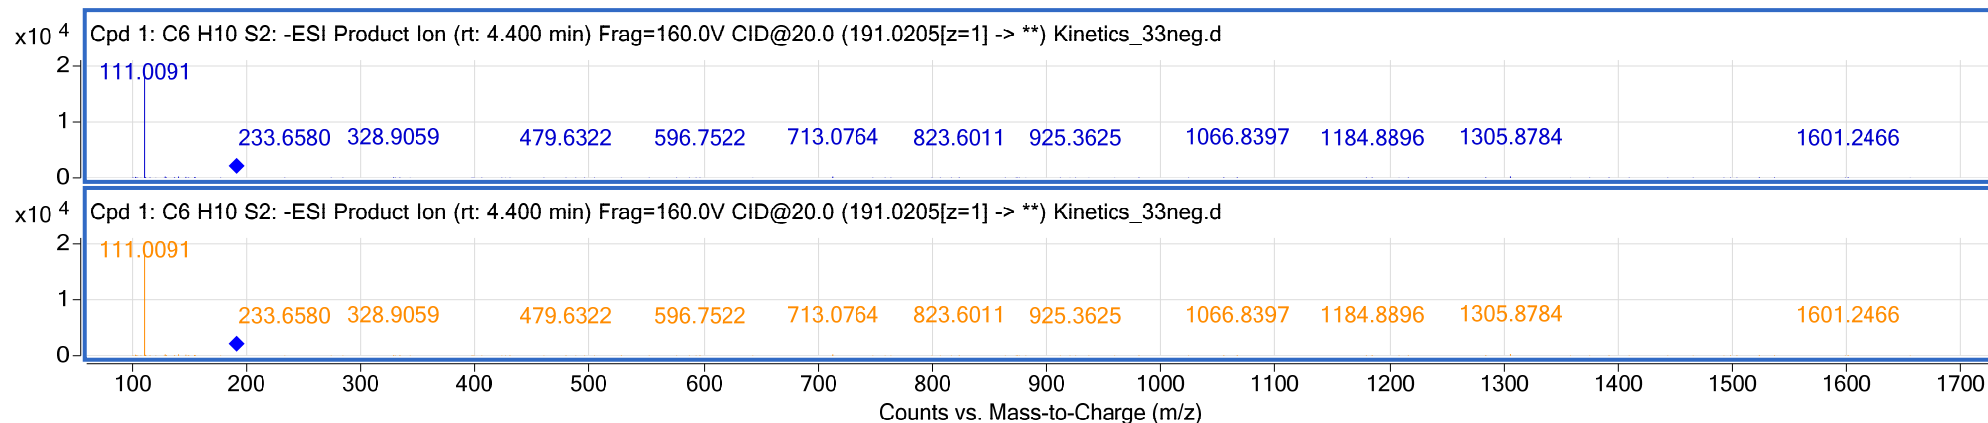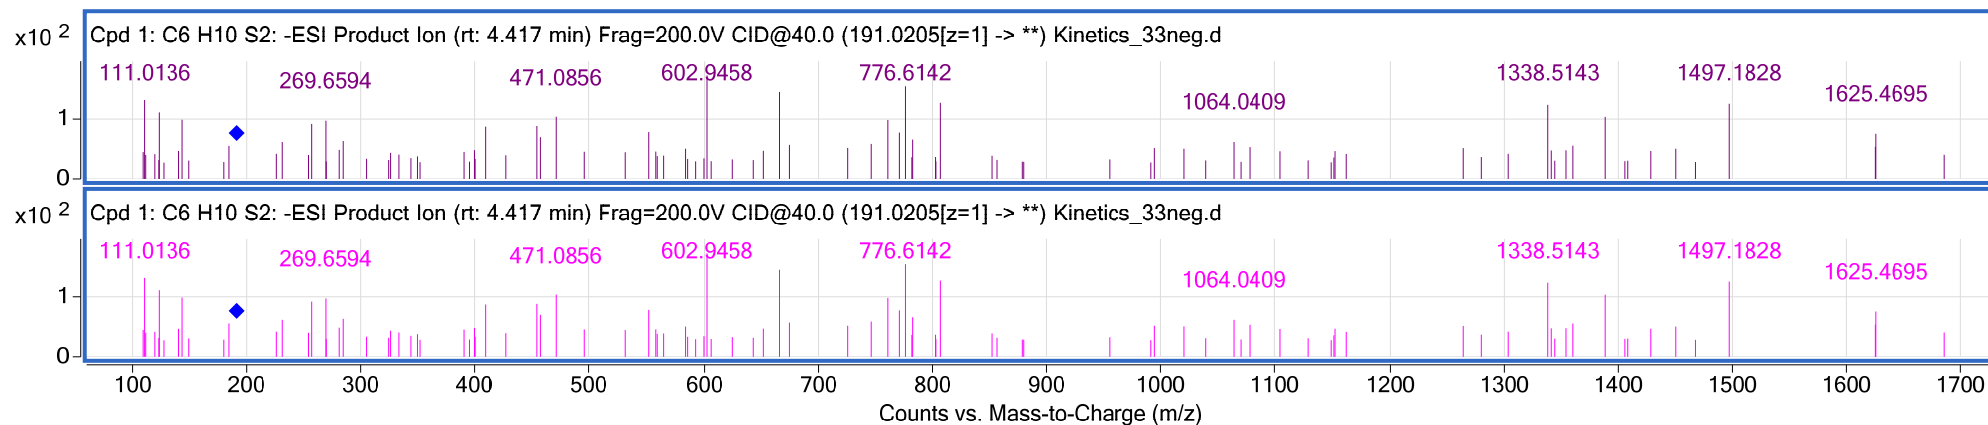

**17. C<sub>8</sub> H<sub>14</sub> O<sub>2</sub> S<sub>2</sub>, m/z-205.0365, DL- $\alpha$ -Lipoic acid**

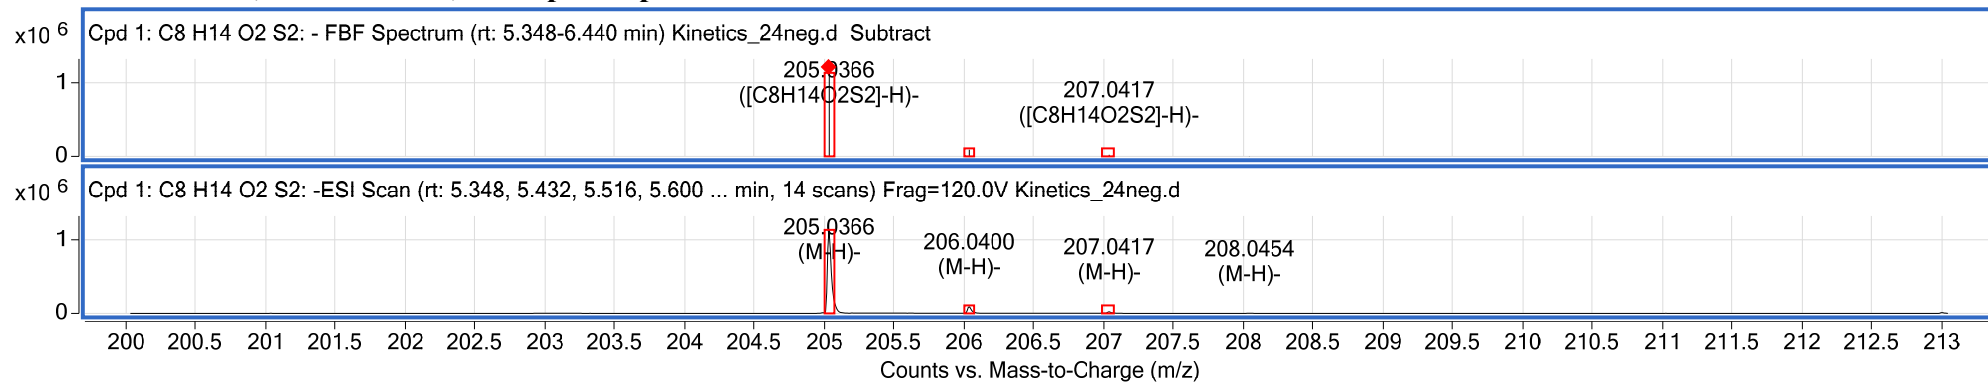



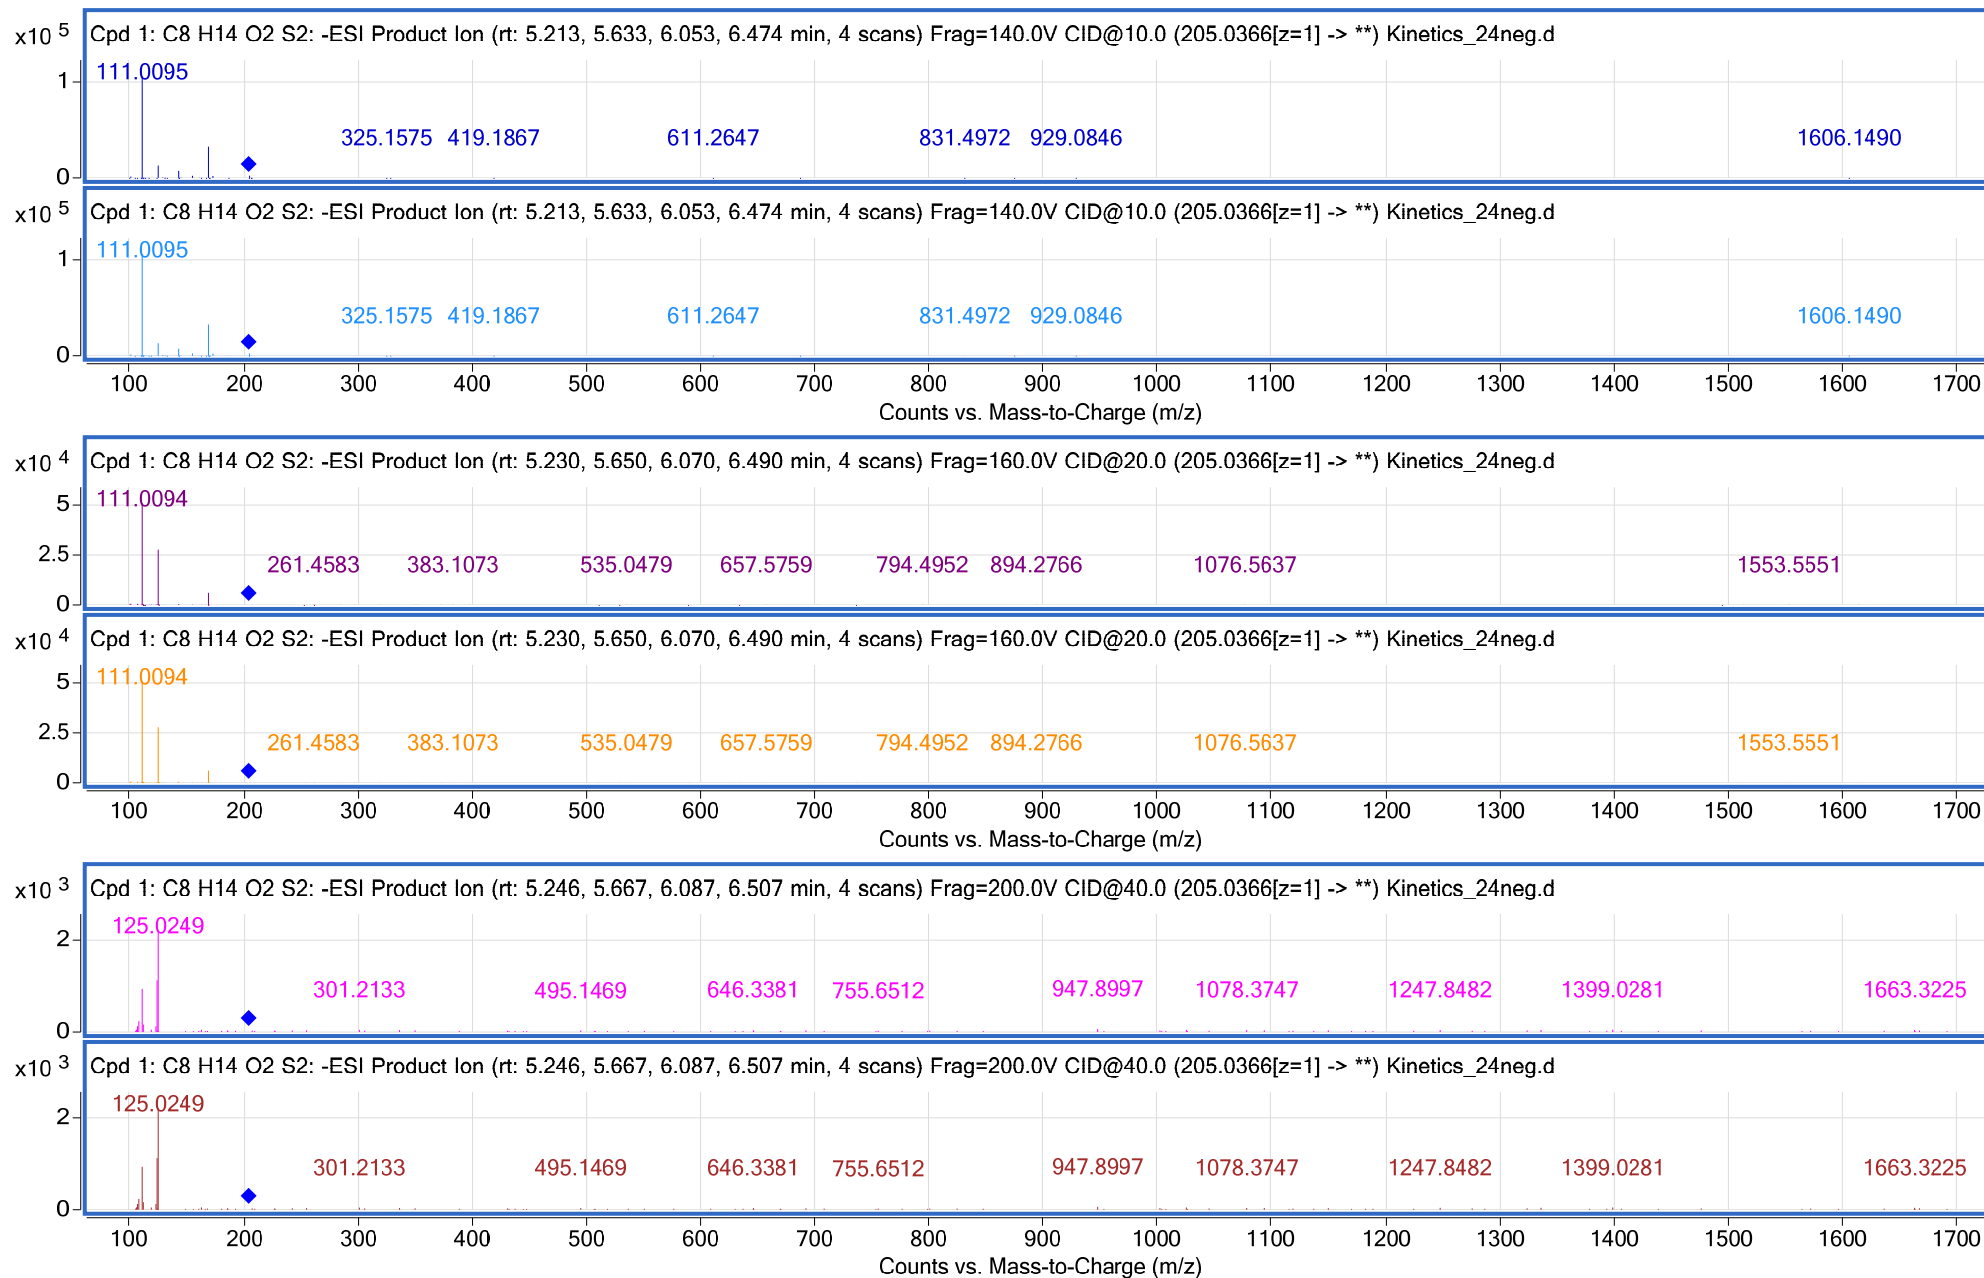

18. C<sub>17</sub> H<sub>26</sub> O<sub>4</sub>, m/z-293.1771, Embelin

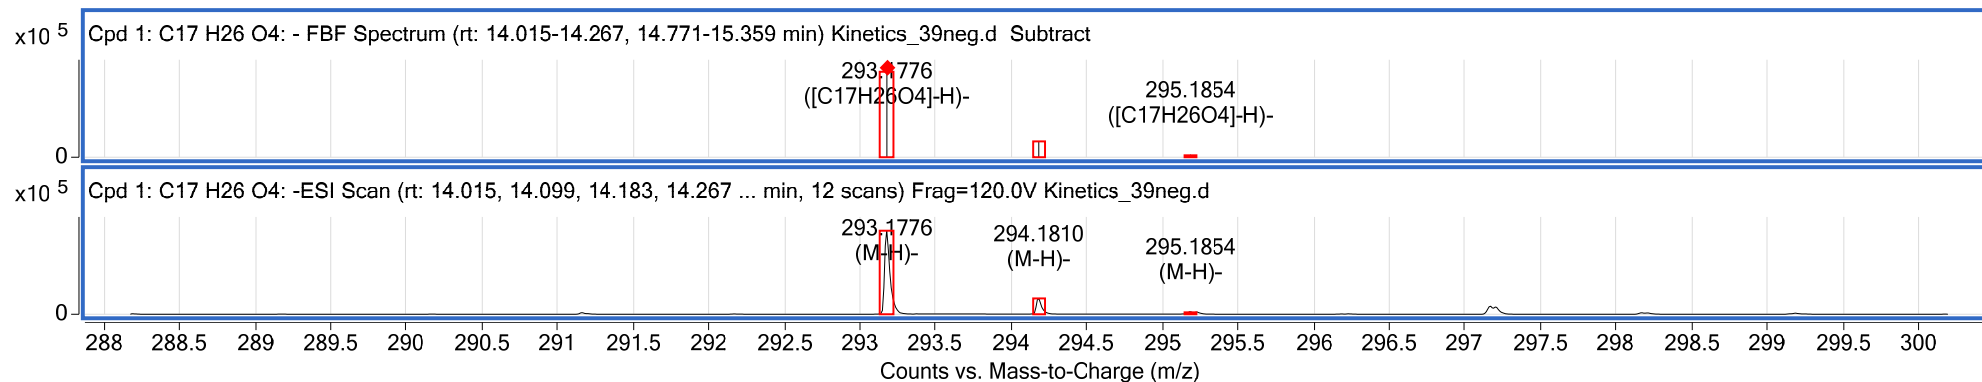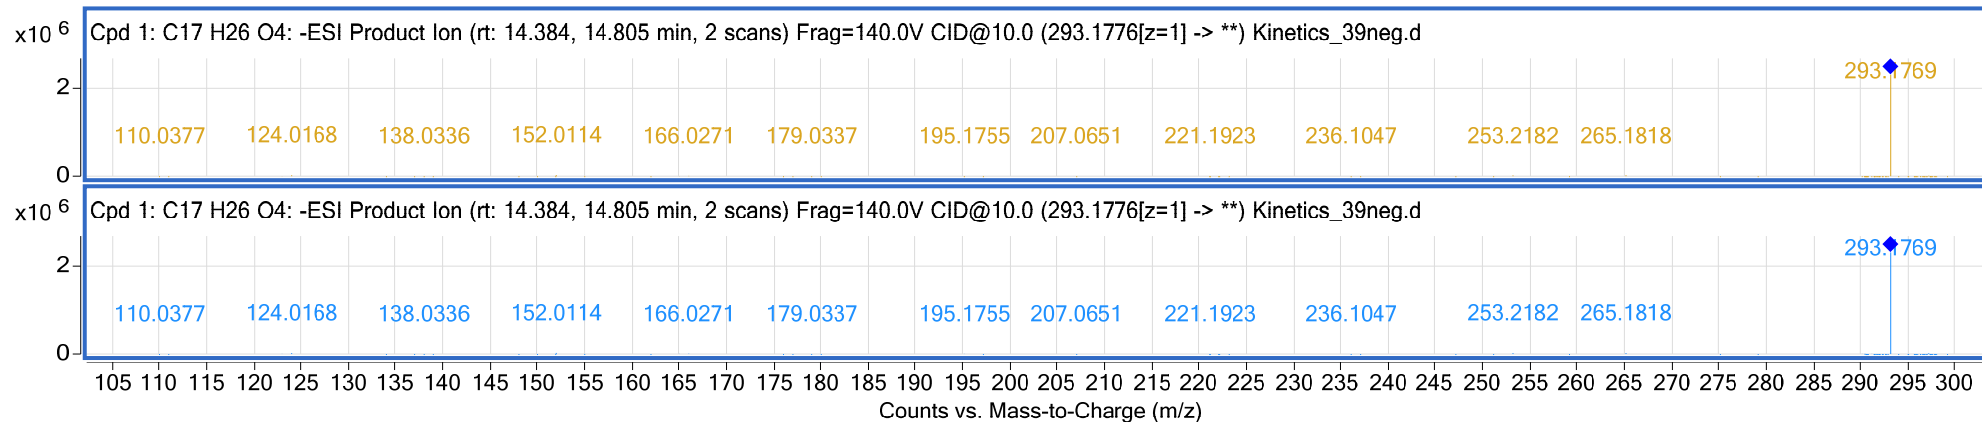

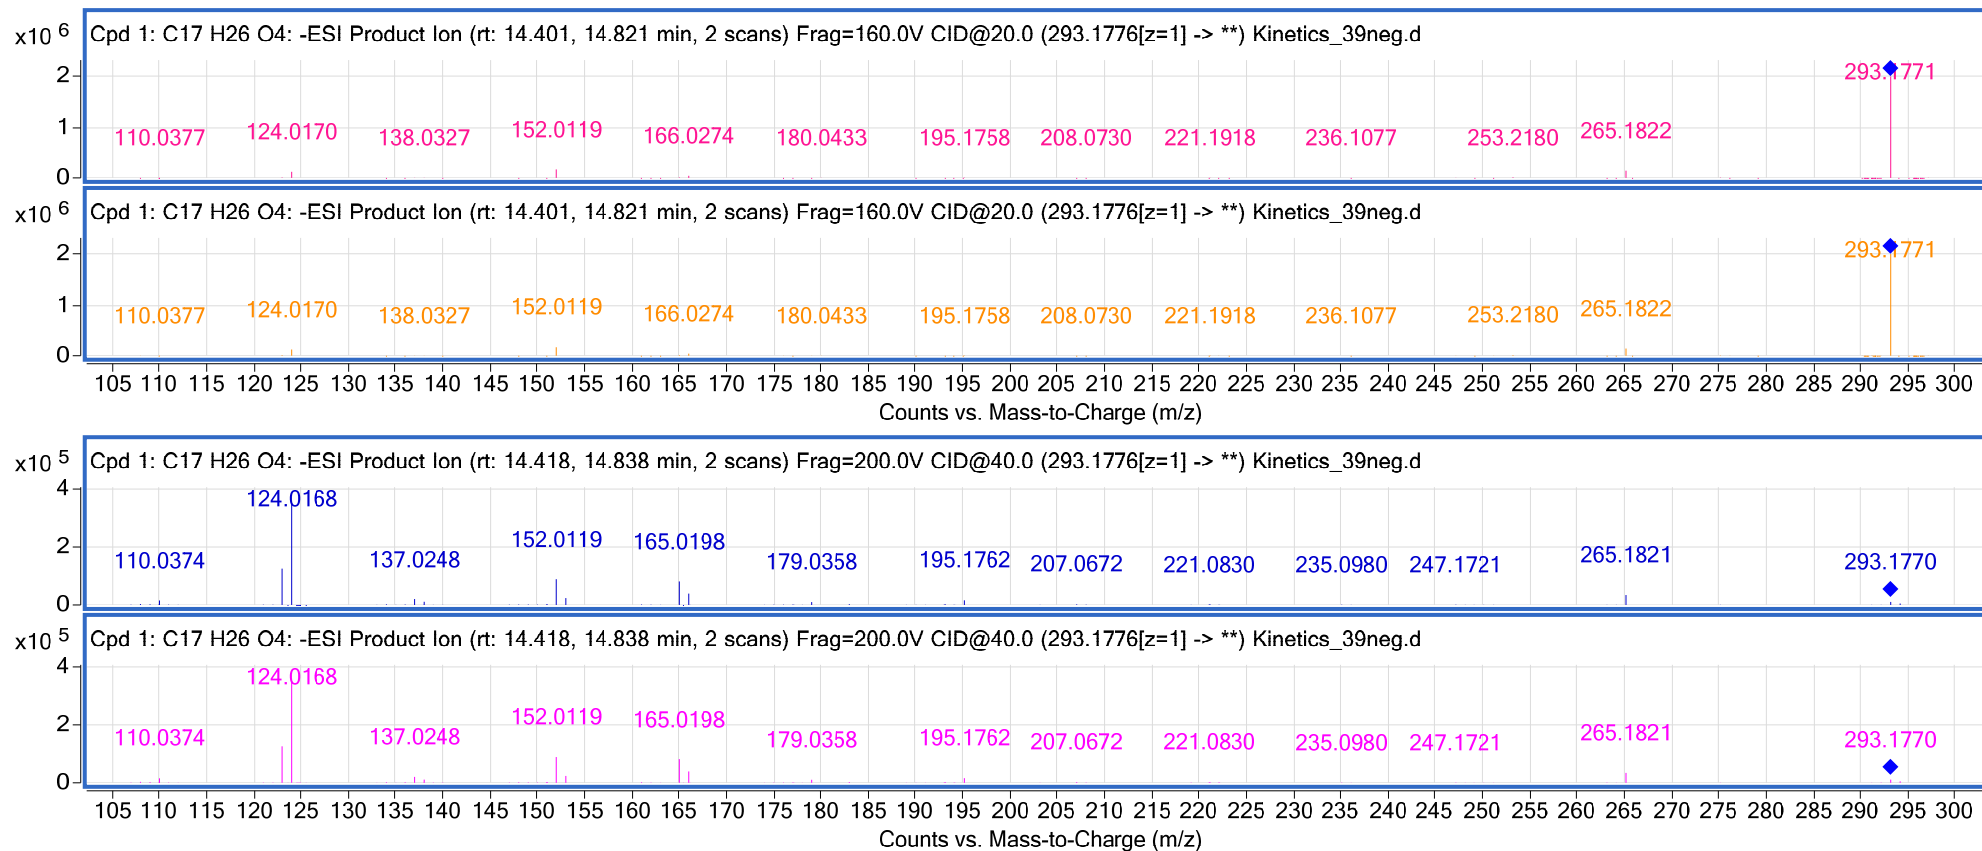

**19. C<sub>6</sub>H<sub>14</sub>S<sub>2</sub>, m/z-195.0514, Ethyl-1-methylpropyl disulphide**

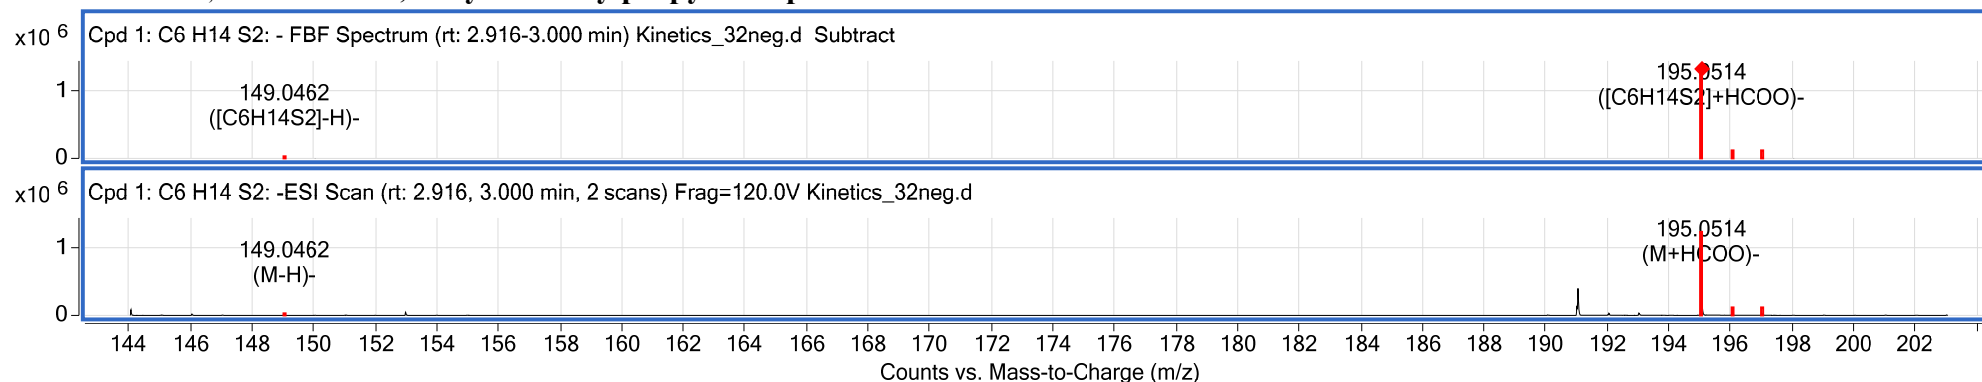

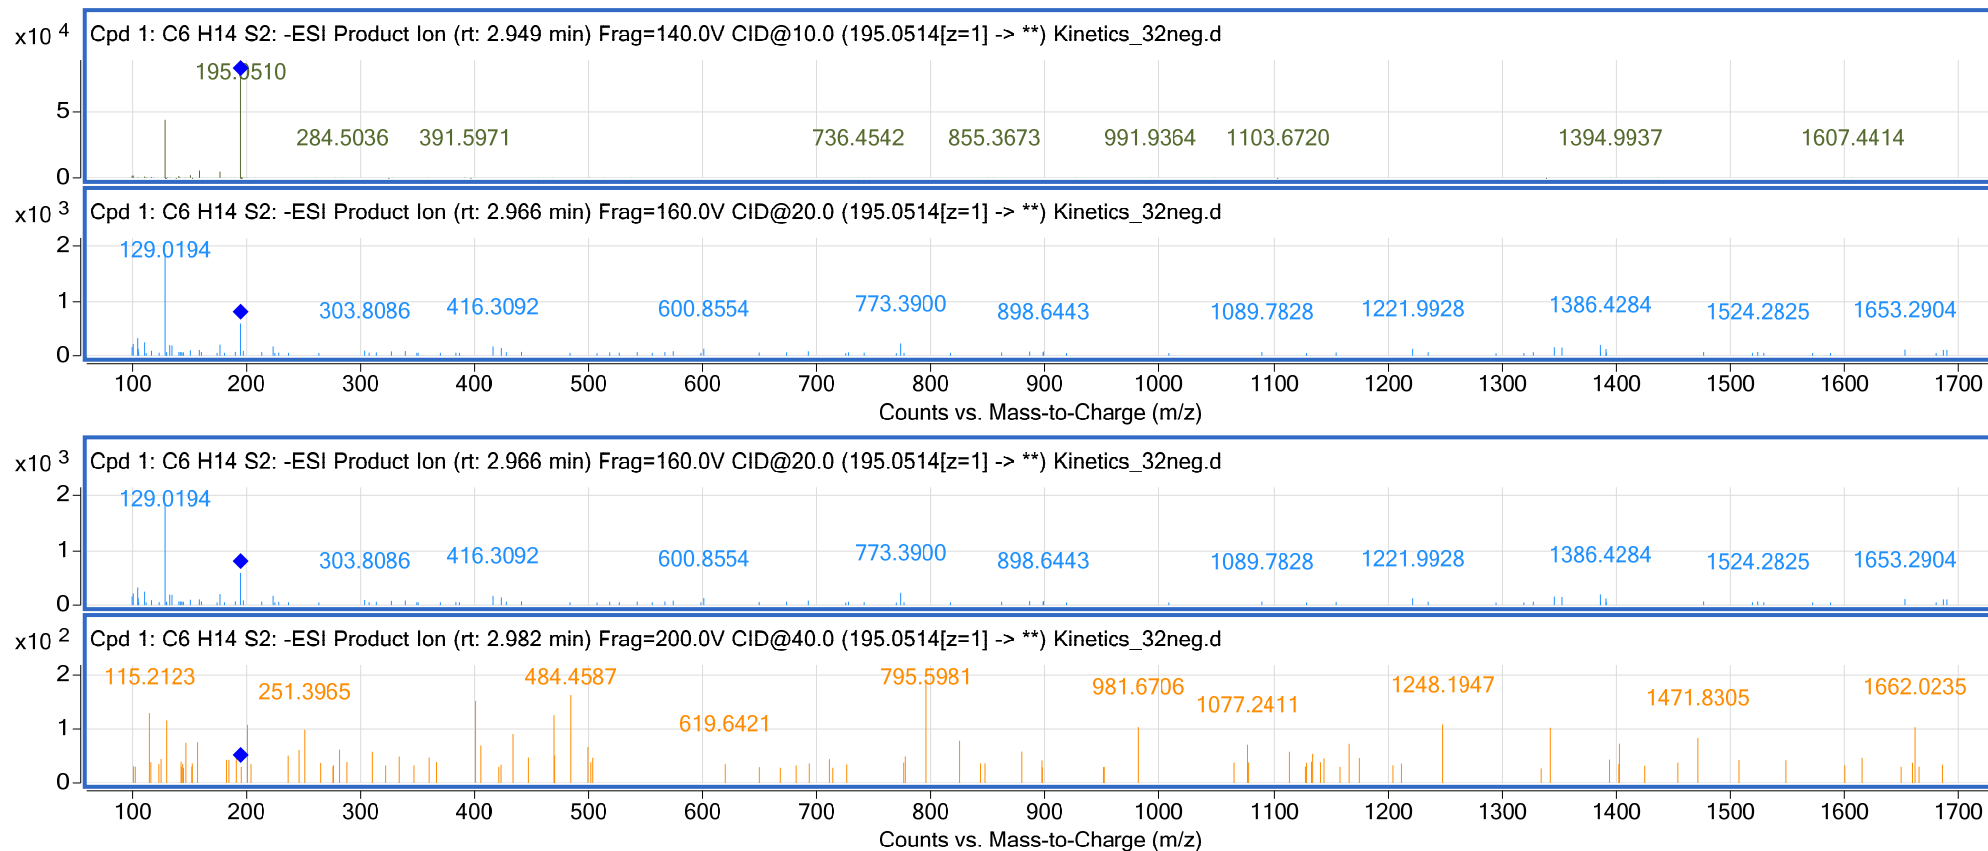

## 20. $C_6 H_{12} O_7$ , m/z-195.0514, Galactonic acid

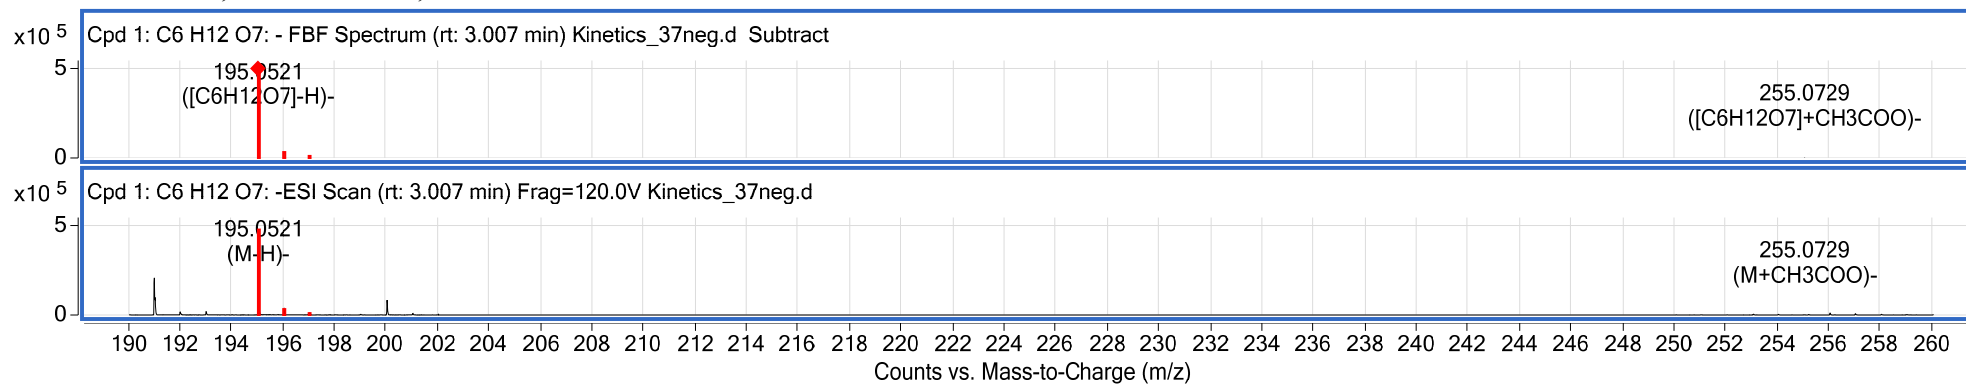

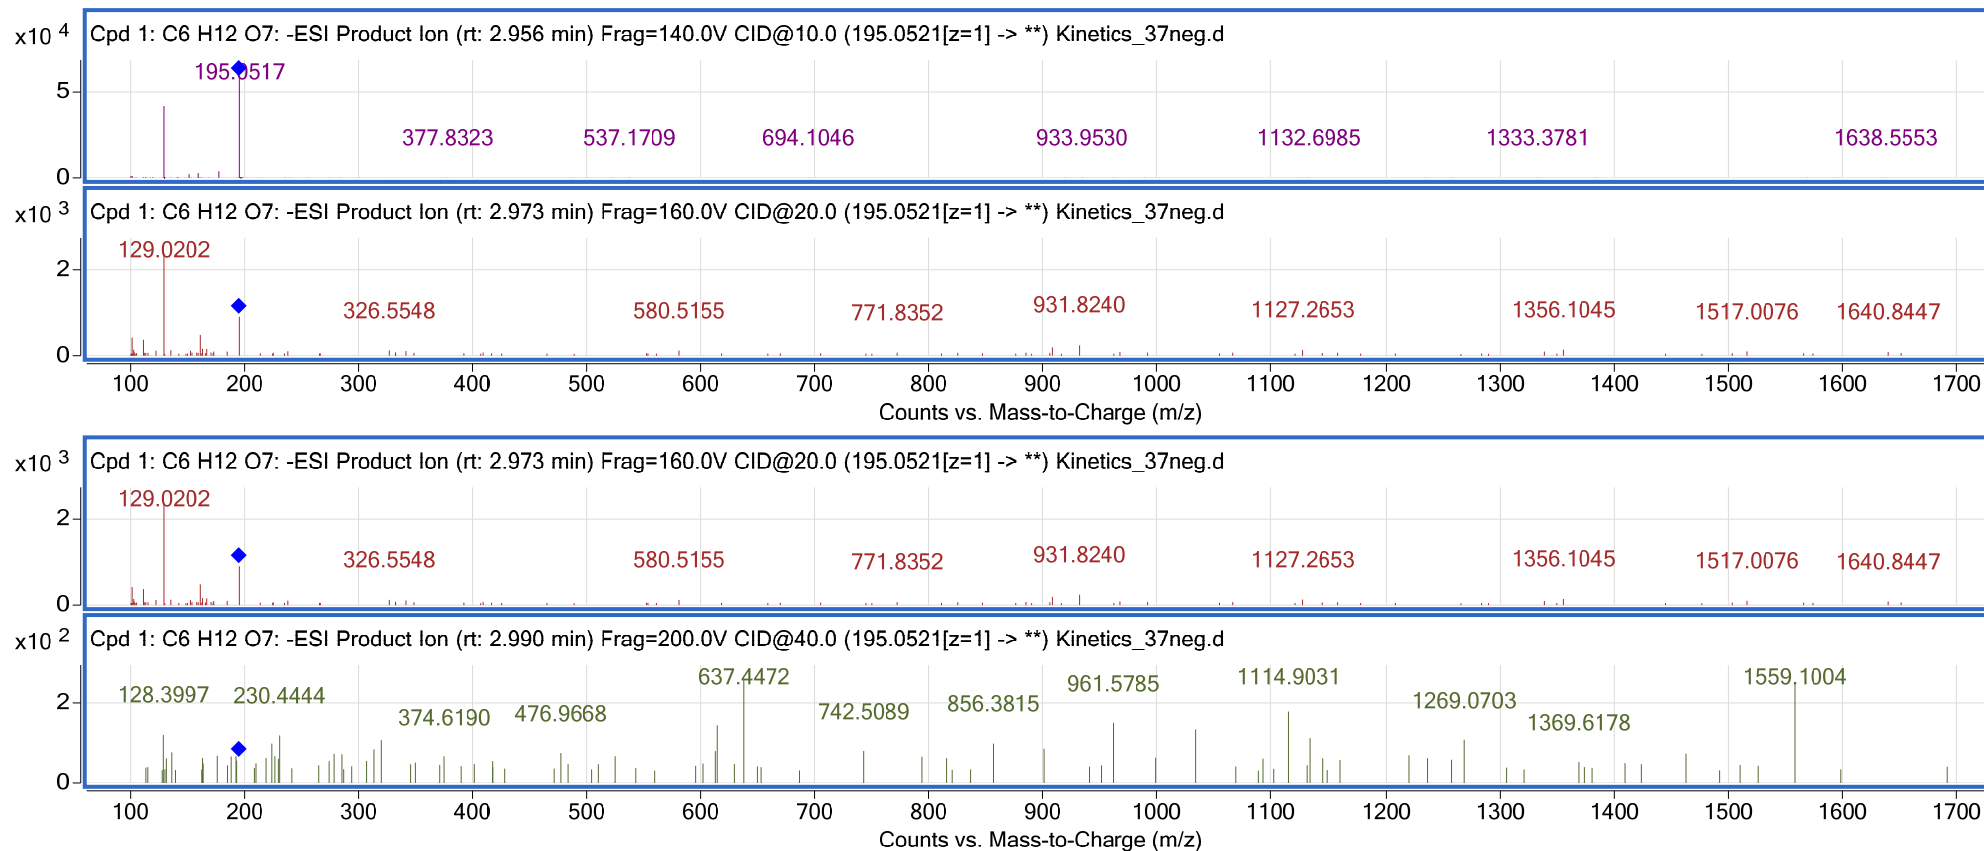

## 21. C<sub>16</sub>H<sub>30</sub>O<sub>4</sub>, m/z-285.2083, Hexadecanedioic acid

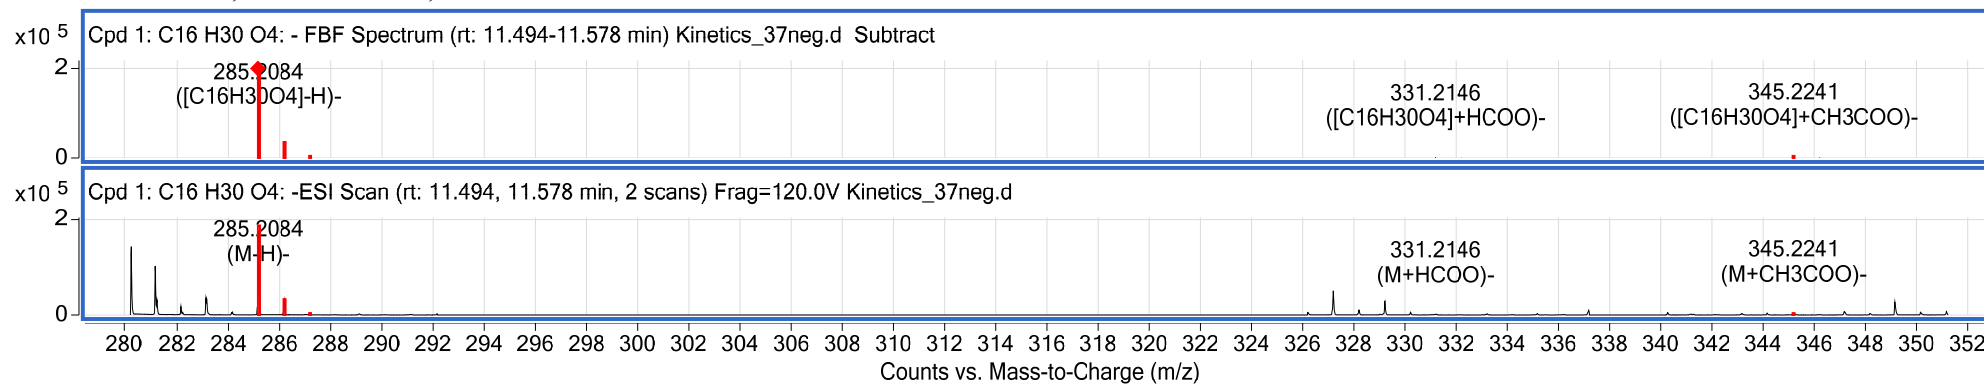

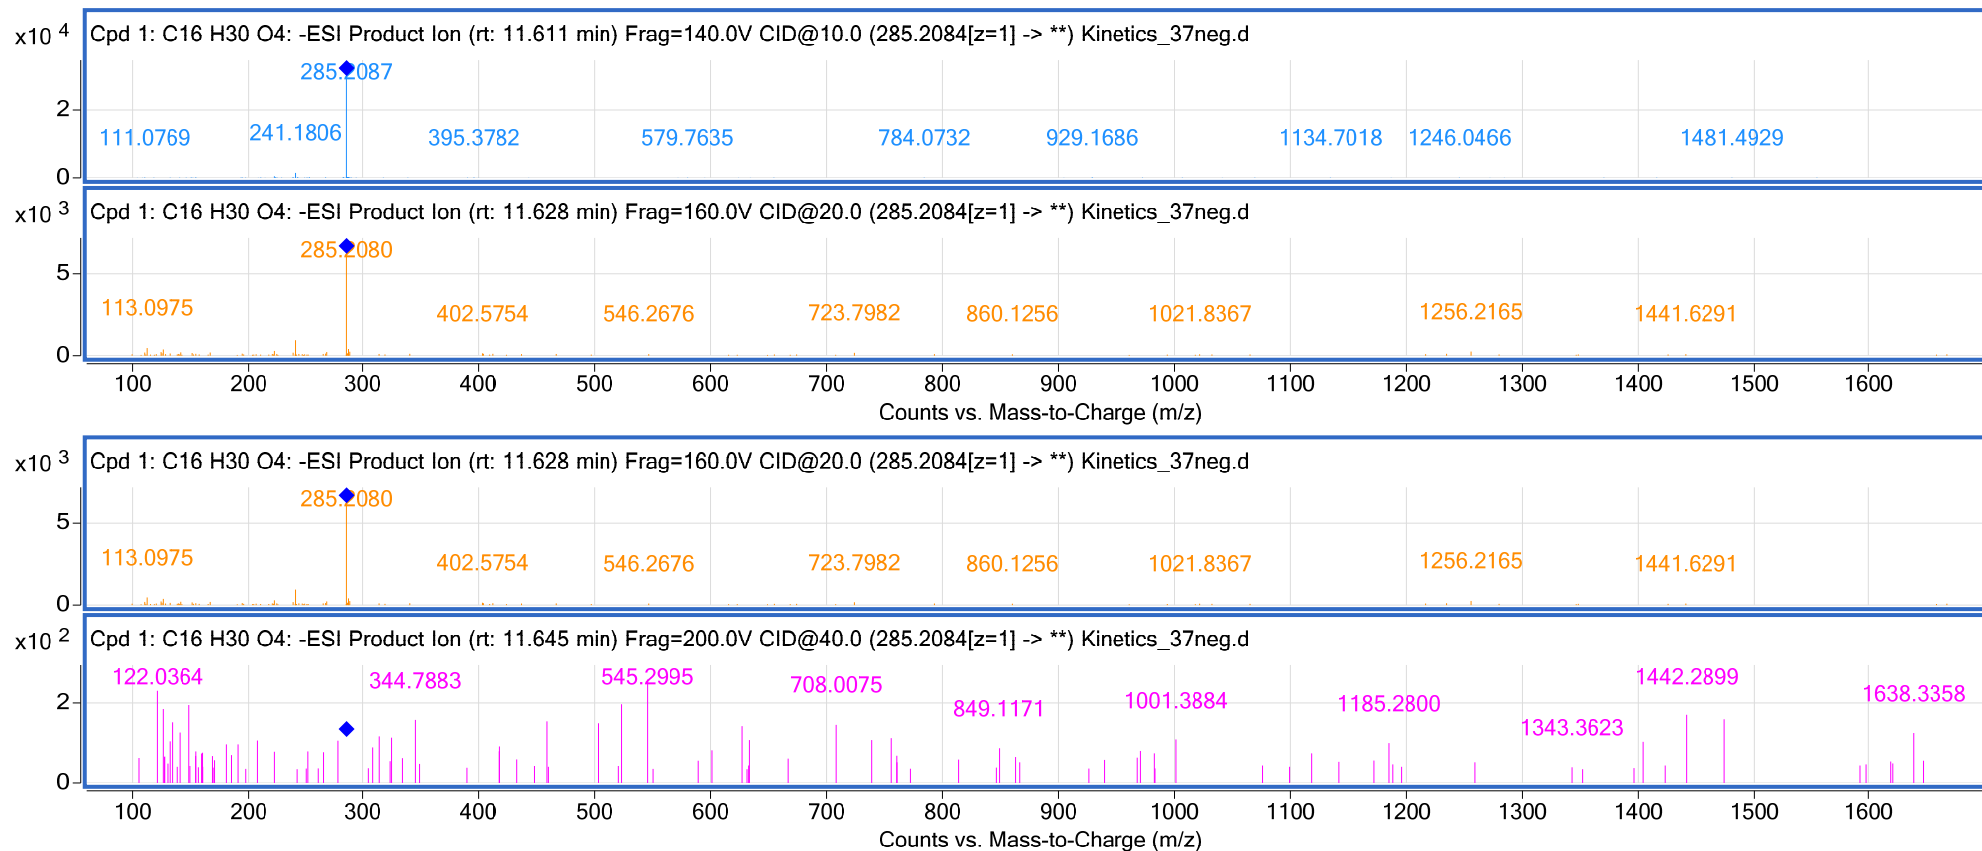

22. **C<sub>21</sub>H<sub>20</sub>O<sub>12</sub>, m/z-219.135, Isoquercitrin**

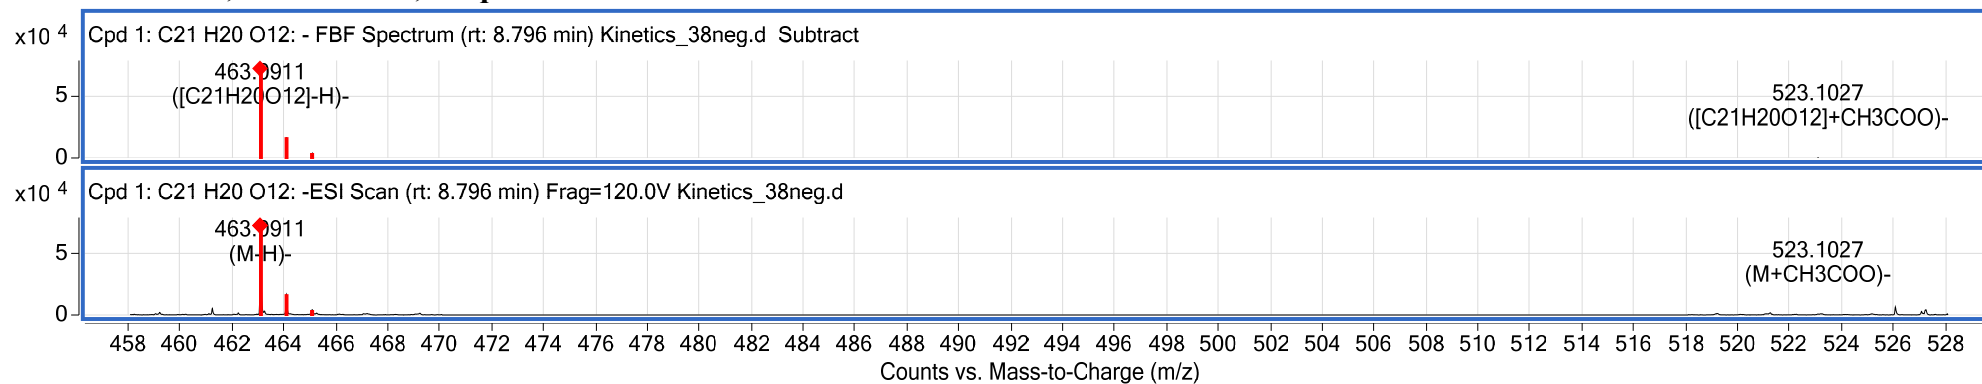

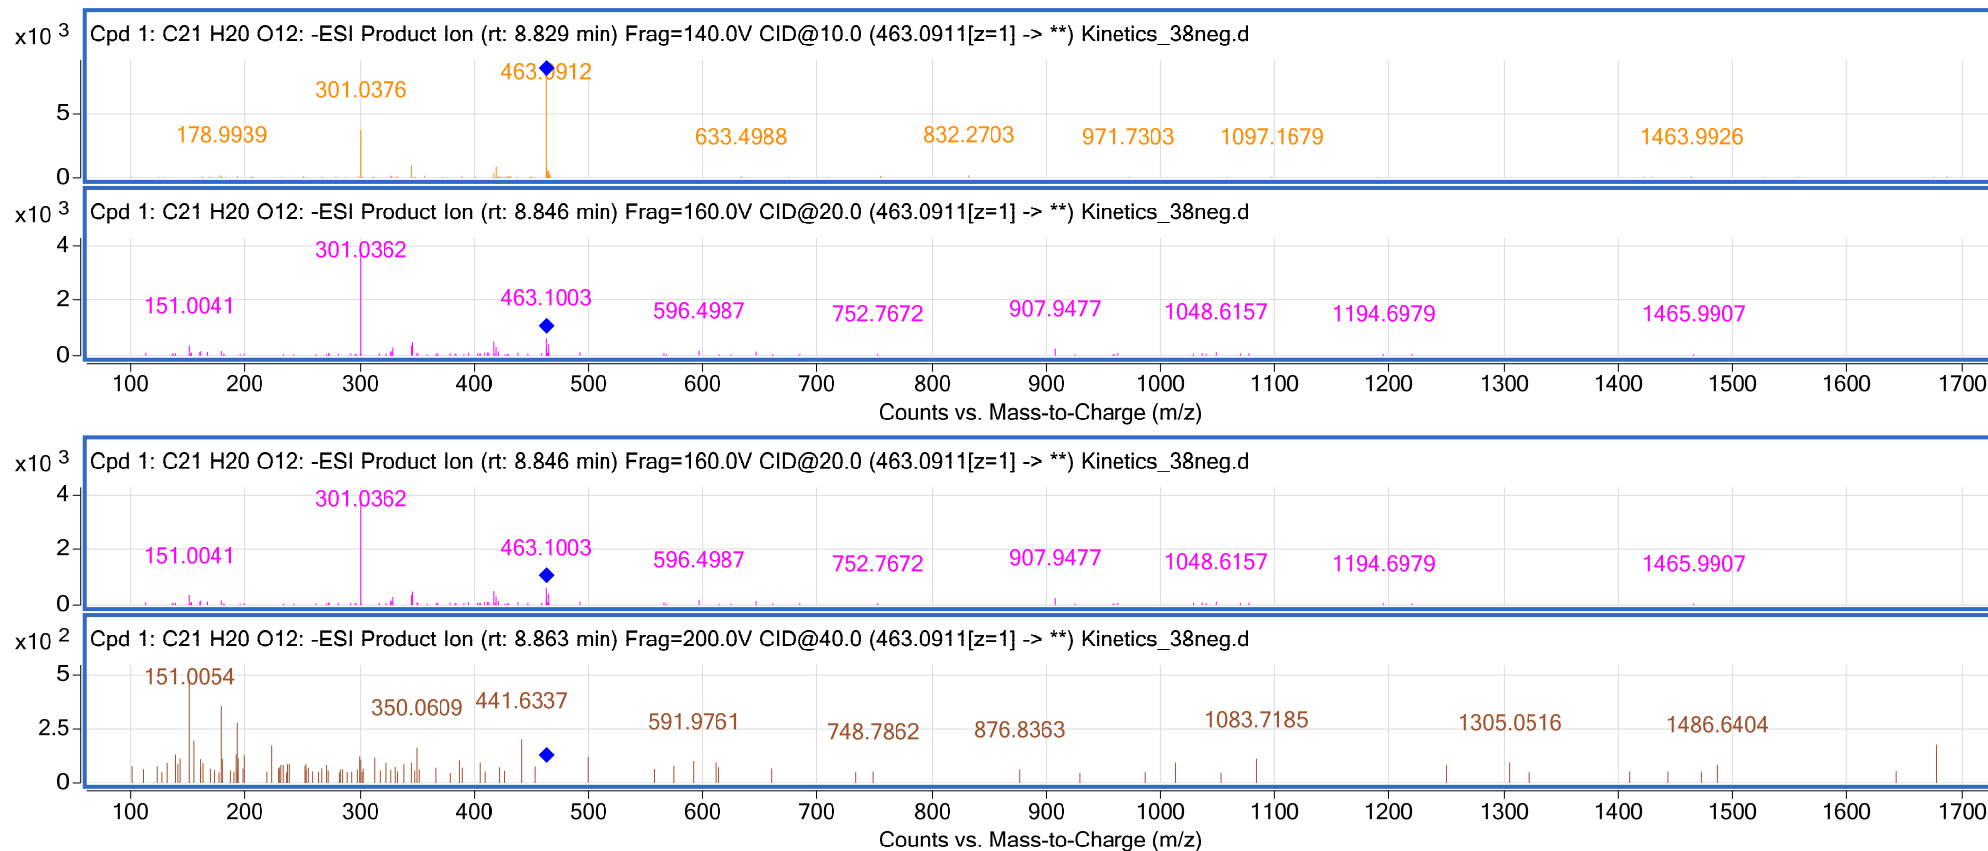

23. C<sub>4</sub> H<sub>6</sub> O<sub>5</sub>, m/z-133.0148, Malic acid

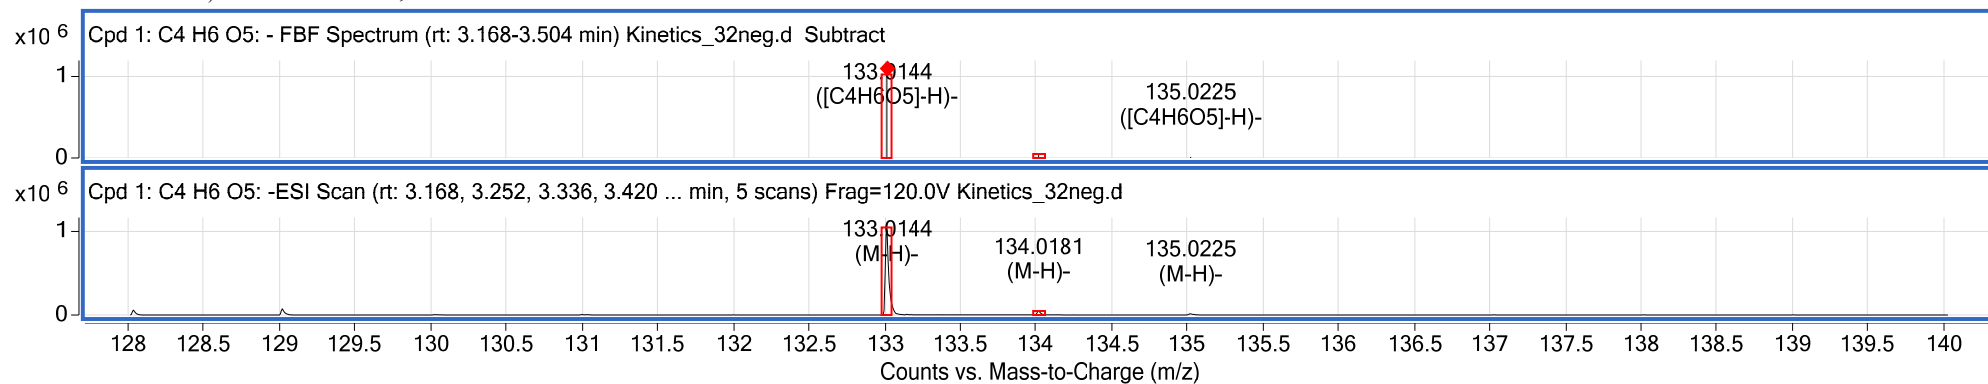

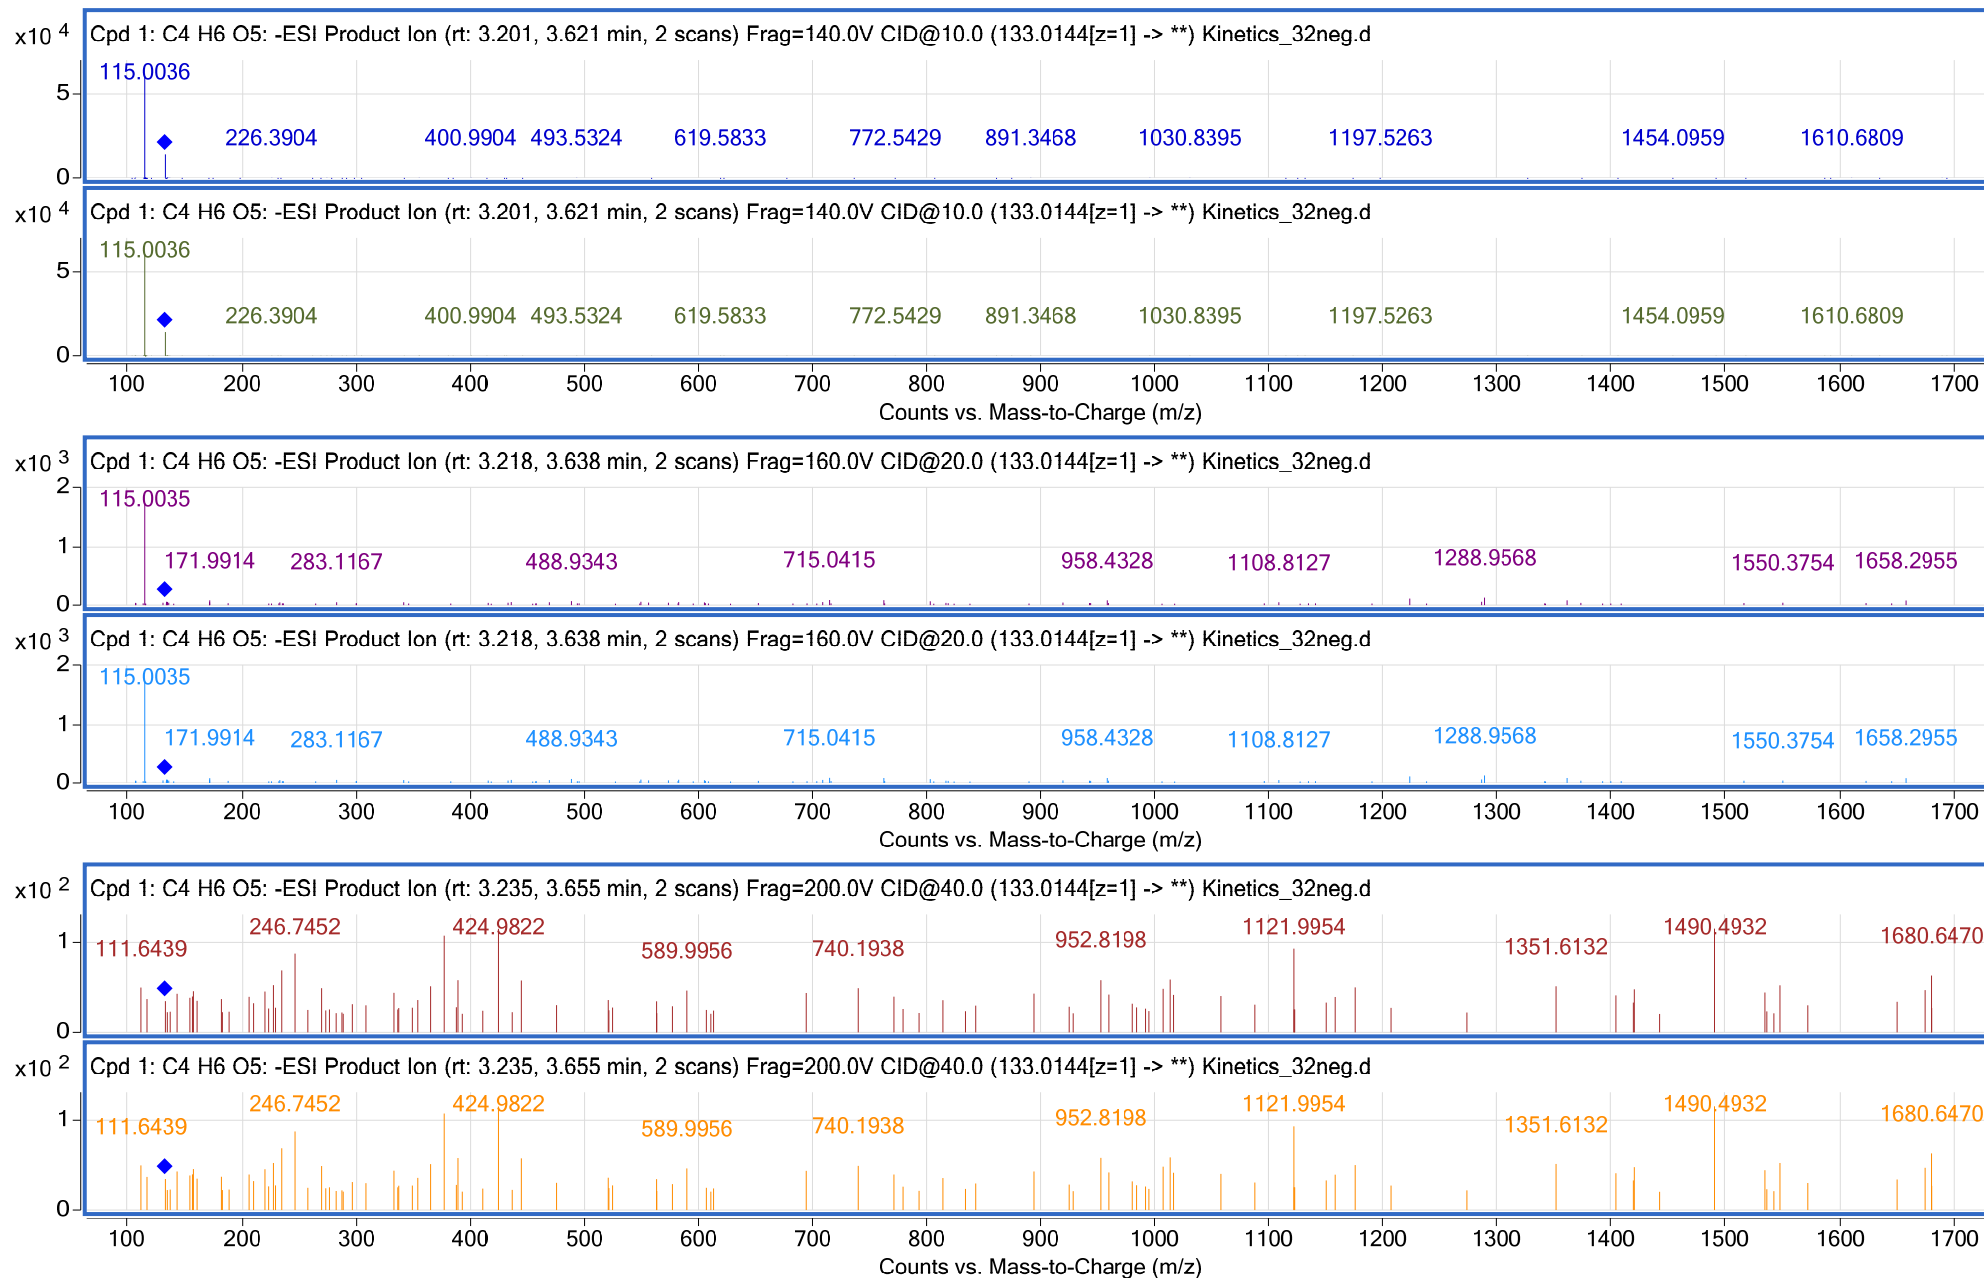

24.  $C_{15}H_{12}O_5$ , m/z-271.0623, Naringenin



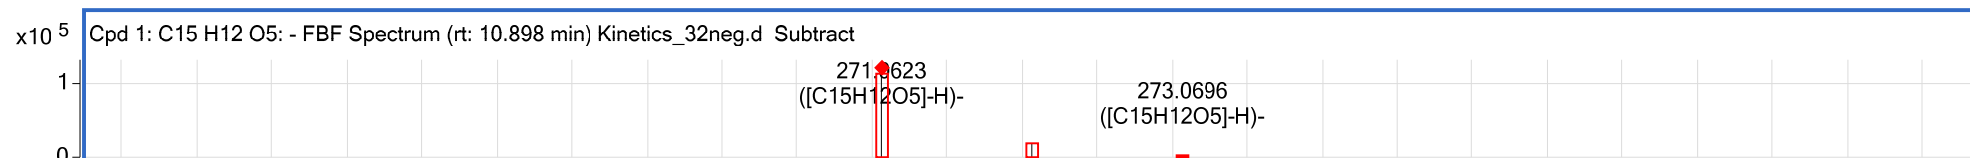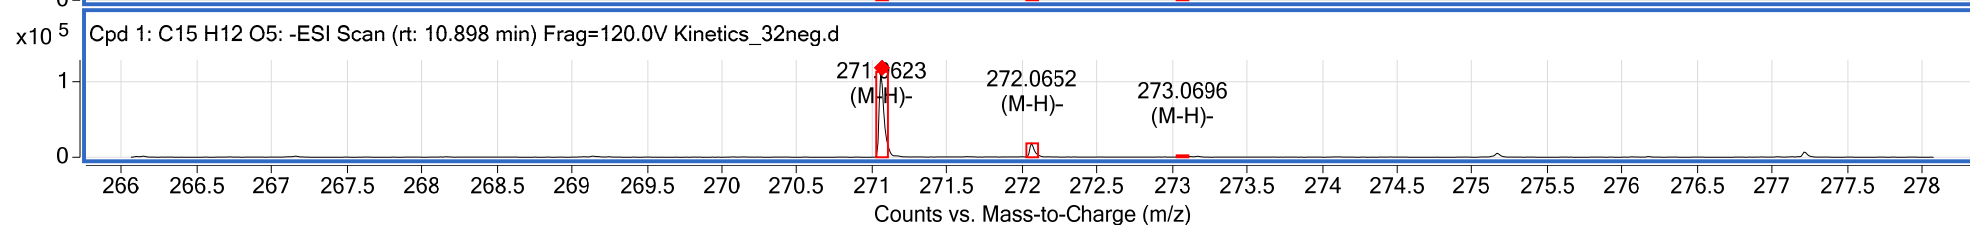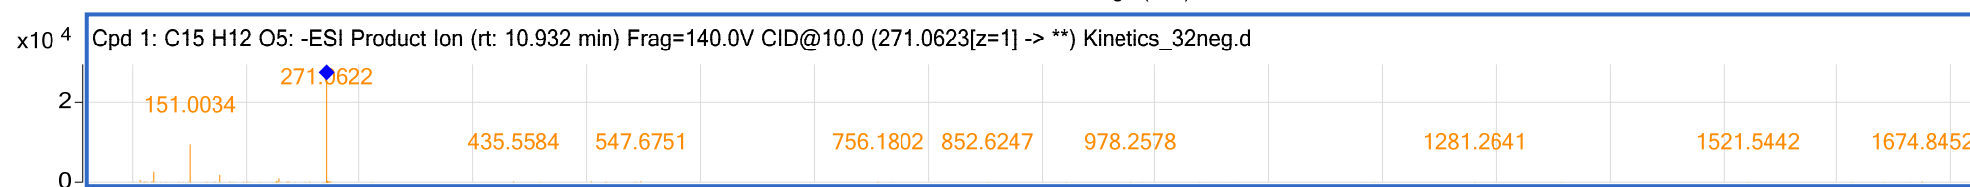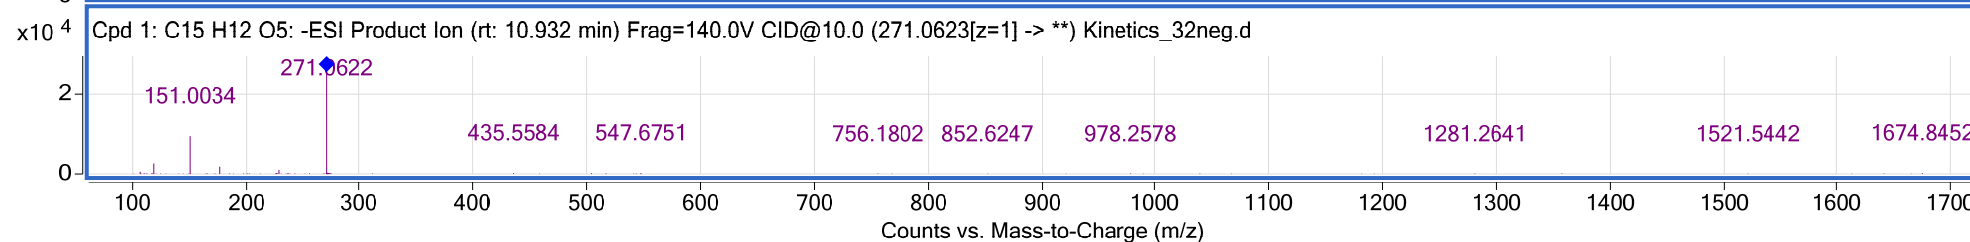

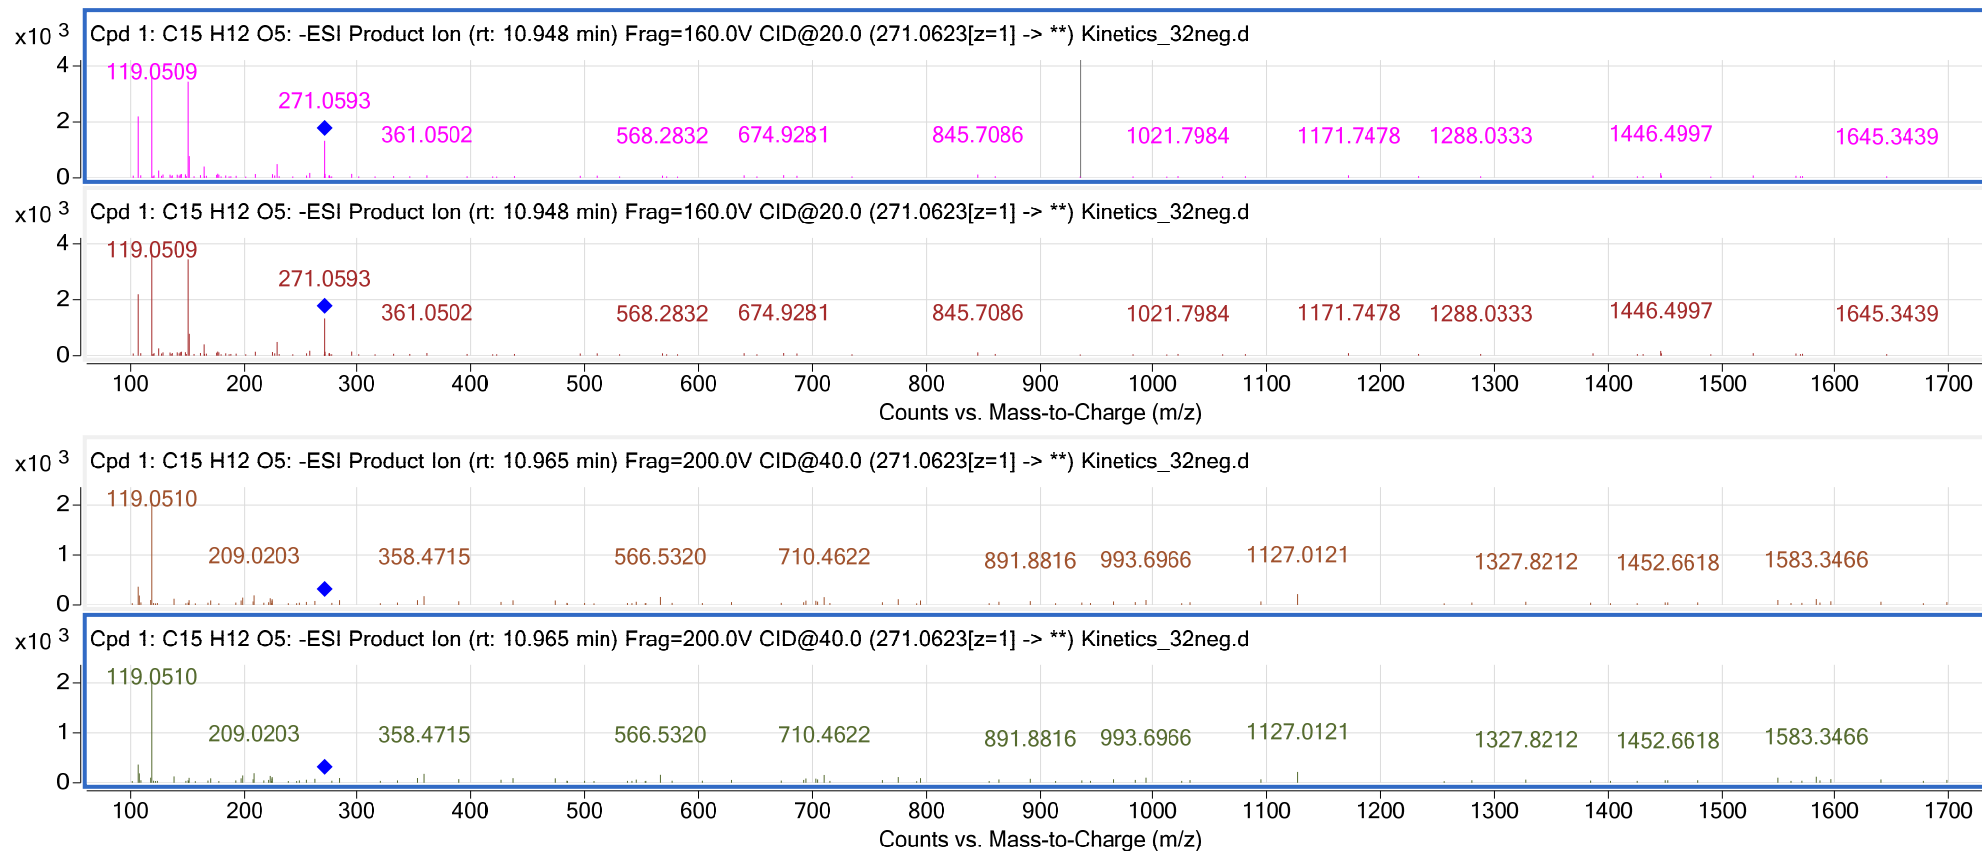

## 25. C<sub>7</sub> H<sub>14</sub> S<sub>2</sub>, m/z- 221.0675, N-propyl sec-butyl disulphide

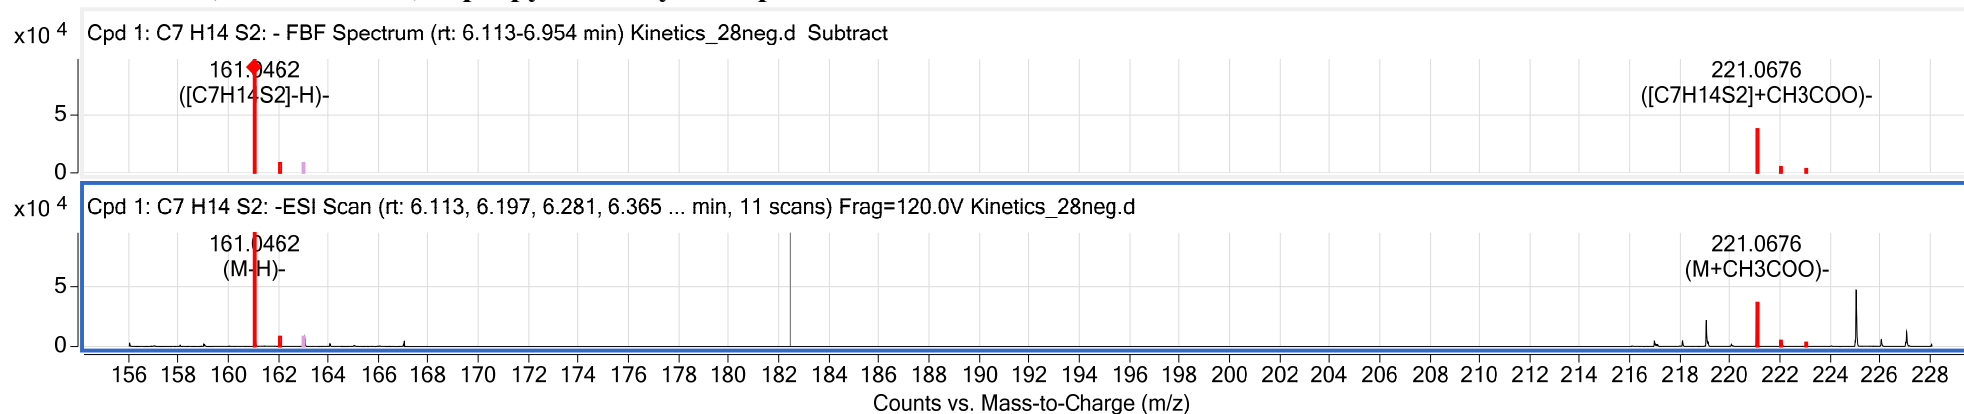

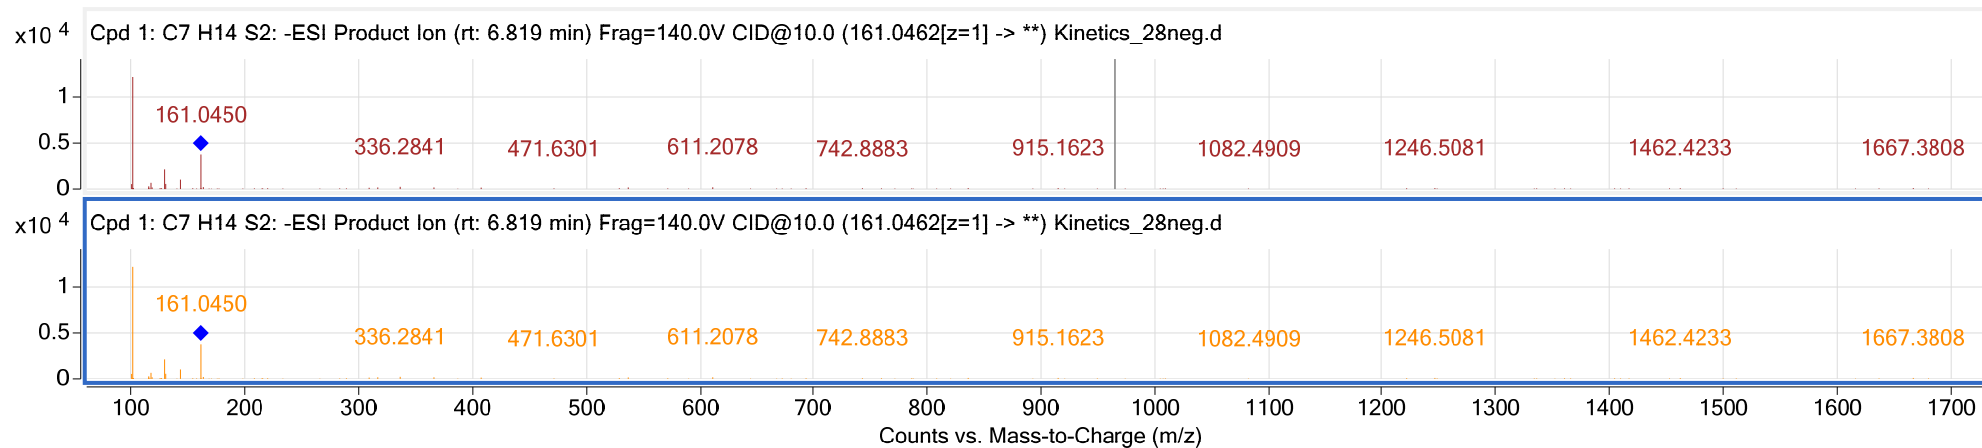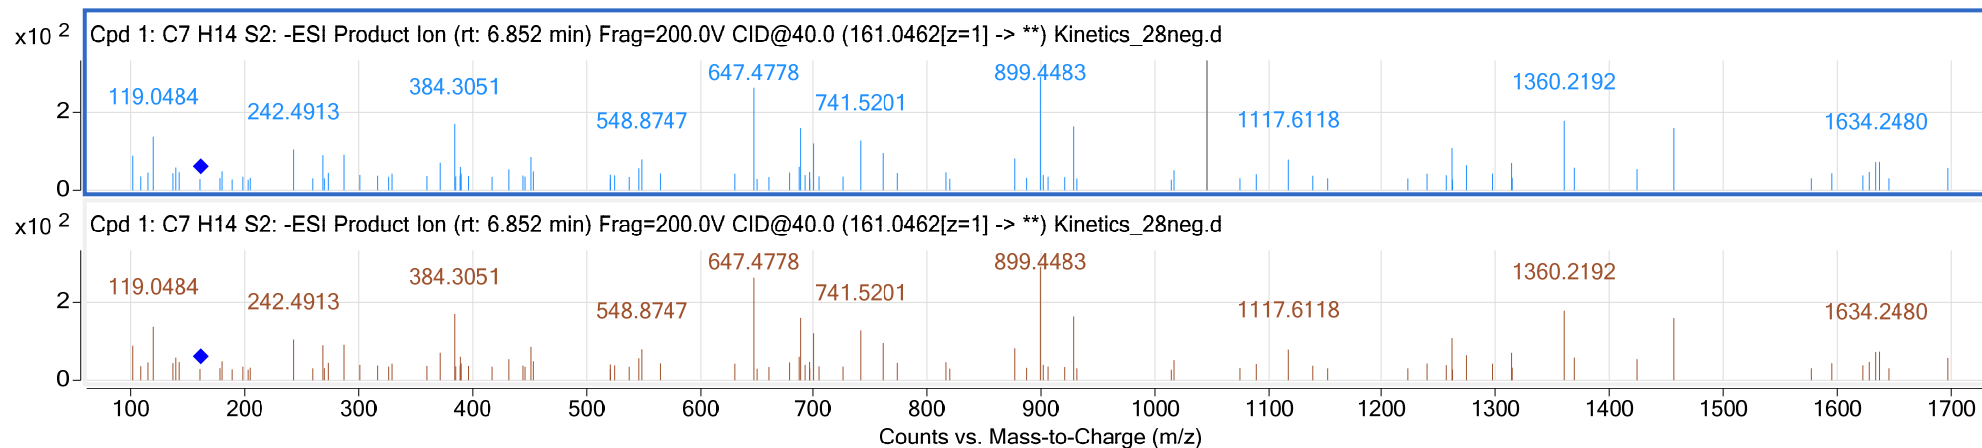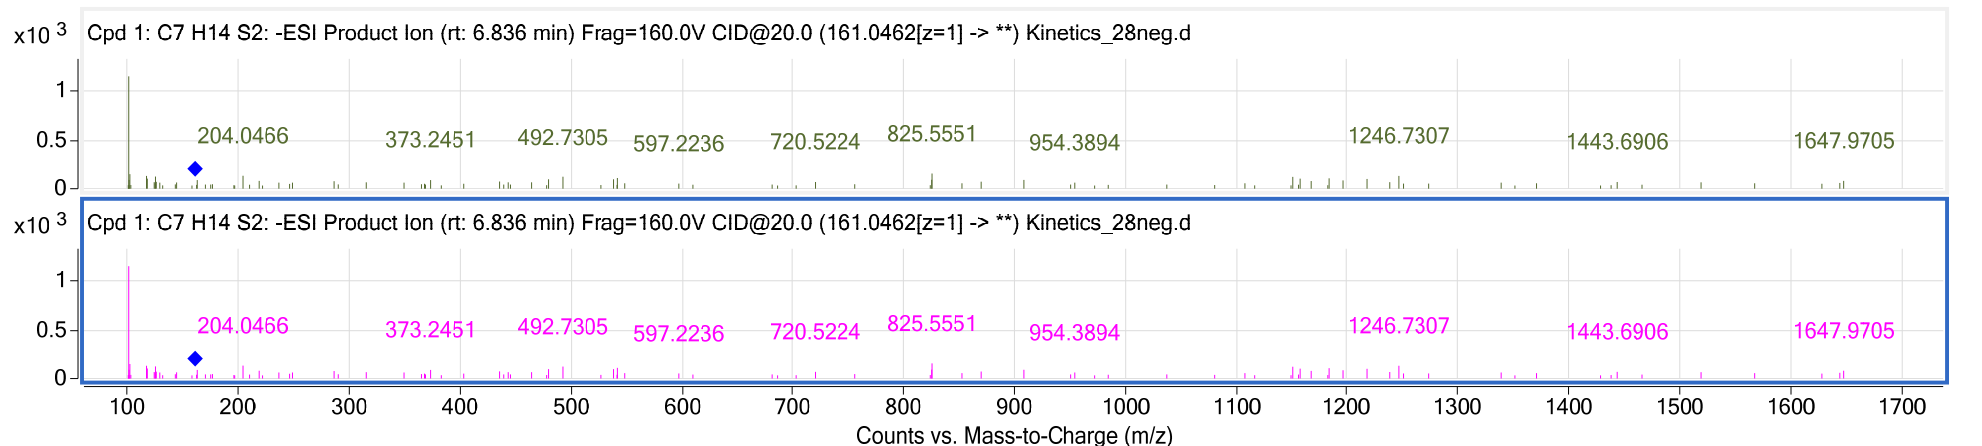

## 26. C<sub>4</sub>H<sub>4</sub>O<sub>5</sub>, m/z-191.0201, Oxaloacetate

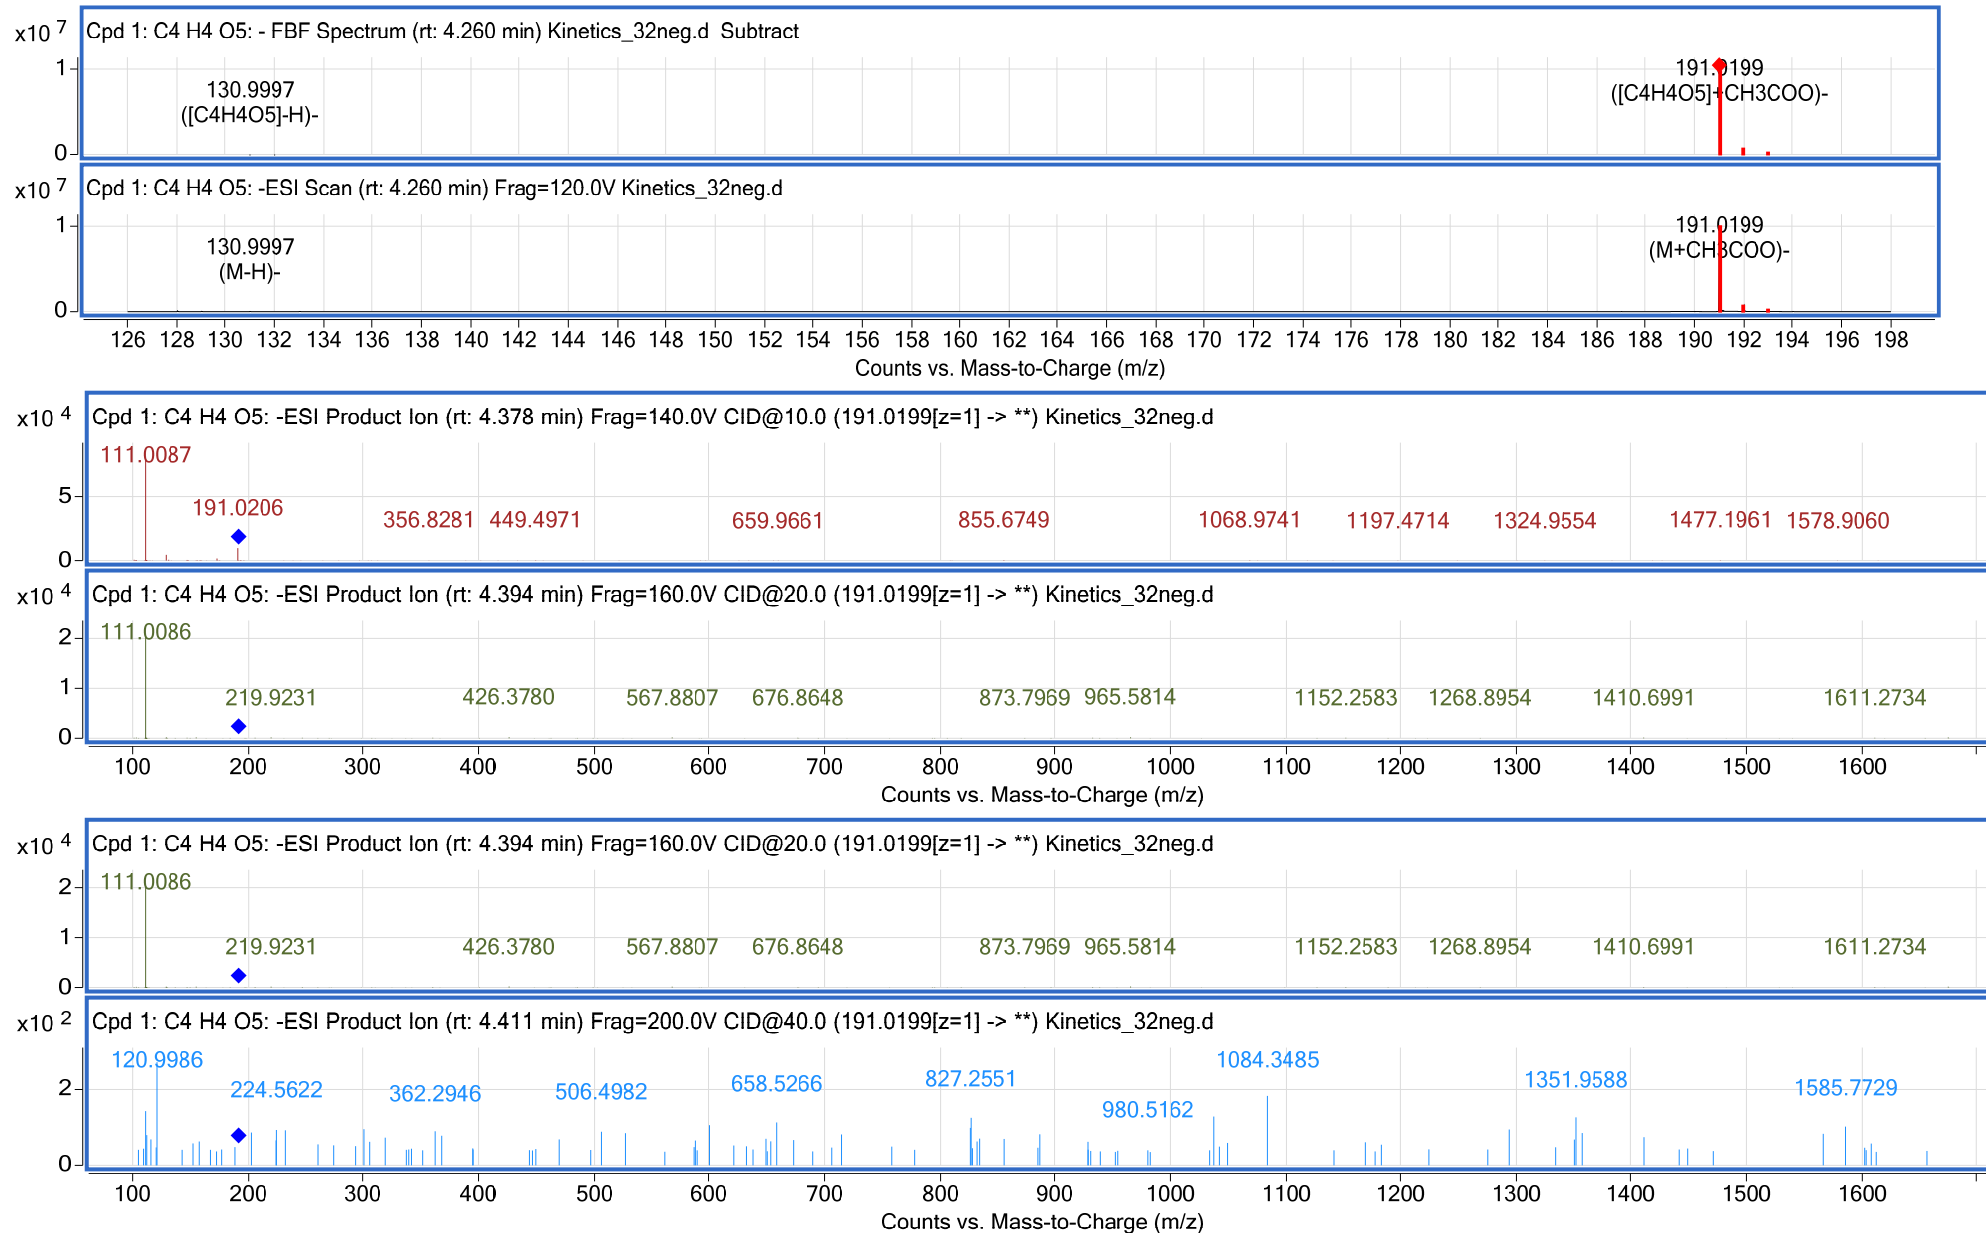

27. **C<sub>14</sub>H<sub>12</sub>O<sub>4</sub>, m/z- 303.0885, Picetannol**

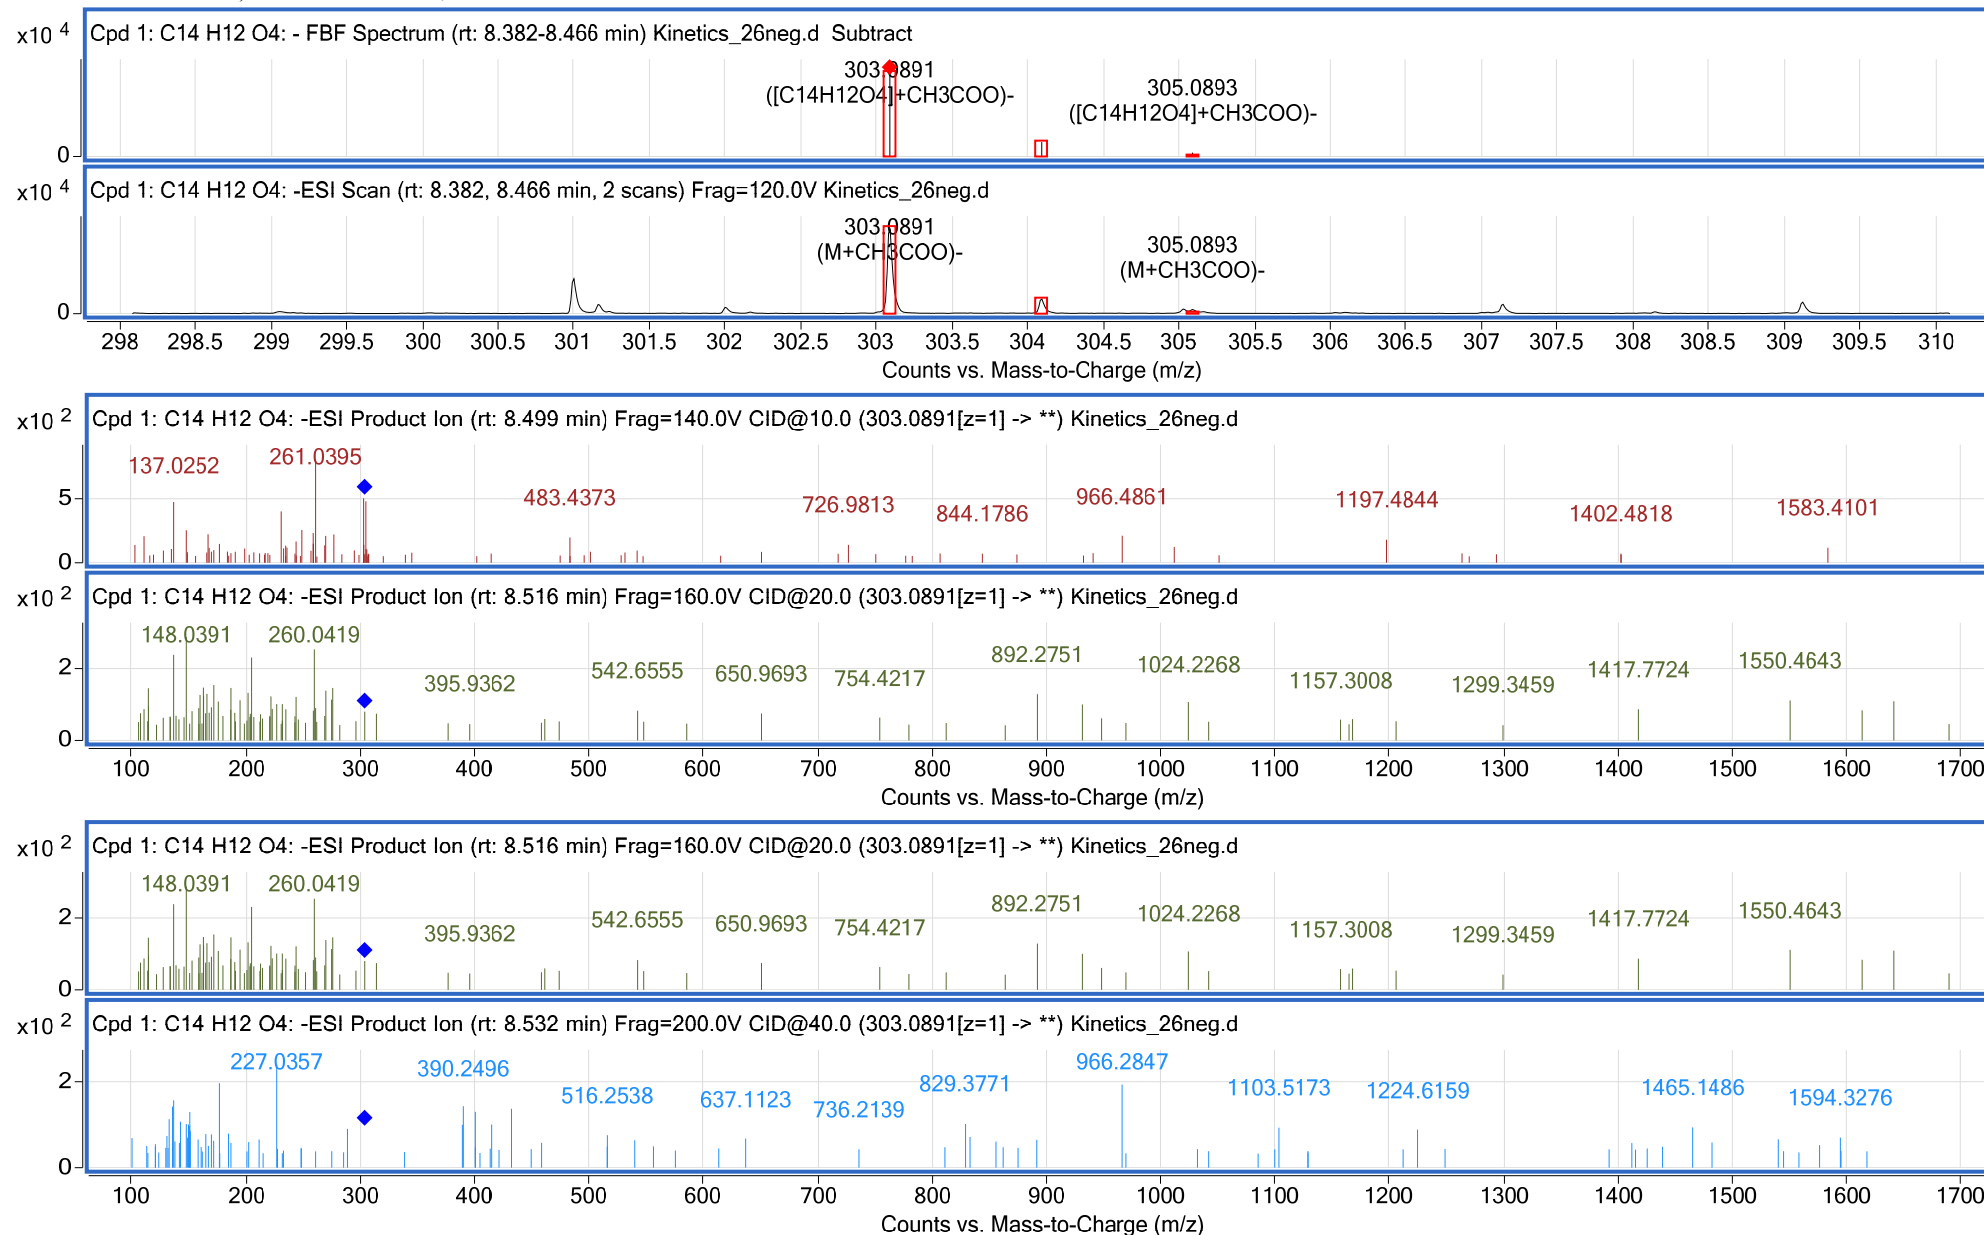

## 28. C<sub>15</sub>H<sub>22</sub>O<sub>2</sub>, m/z-293.1776, Procurcumenol

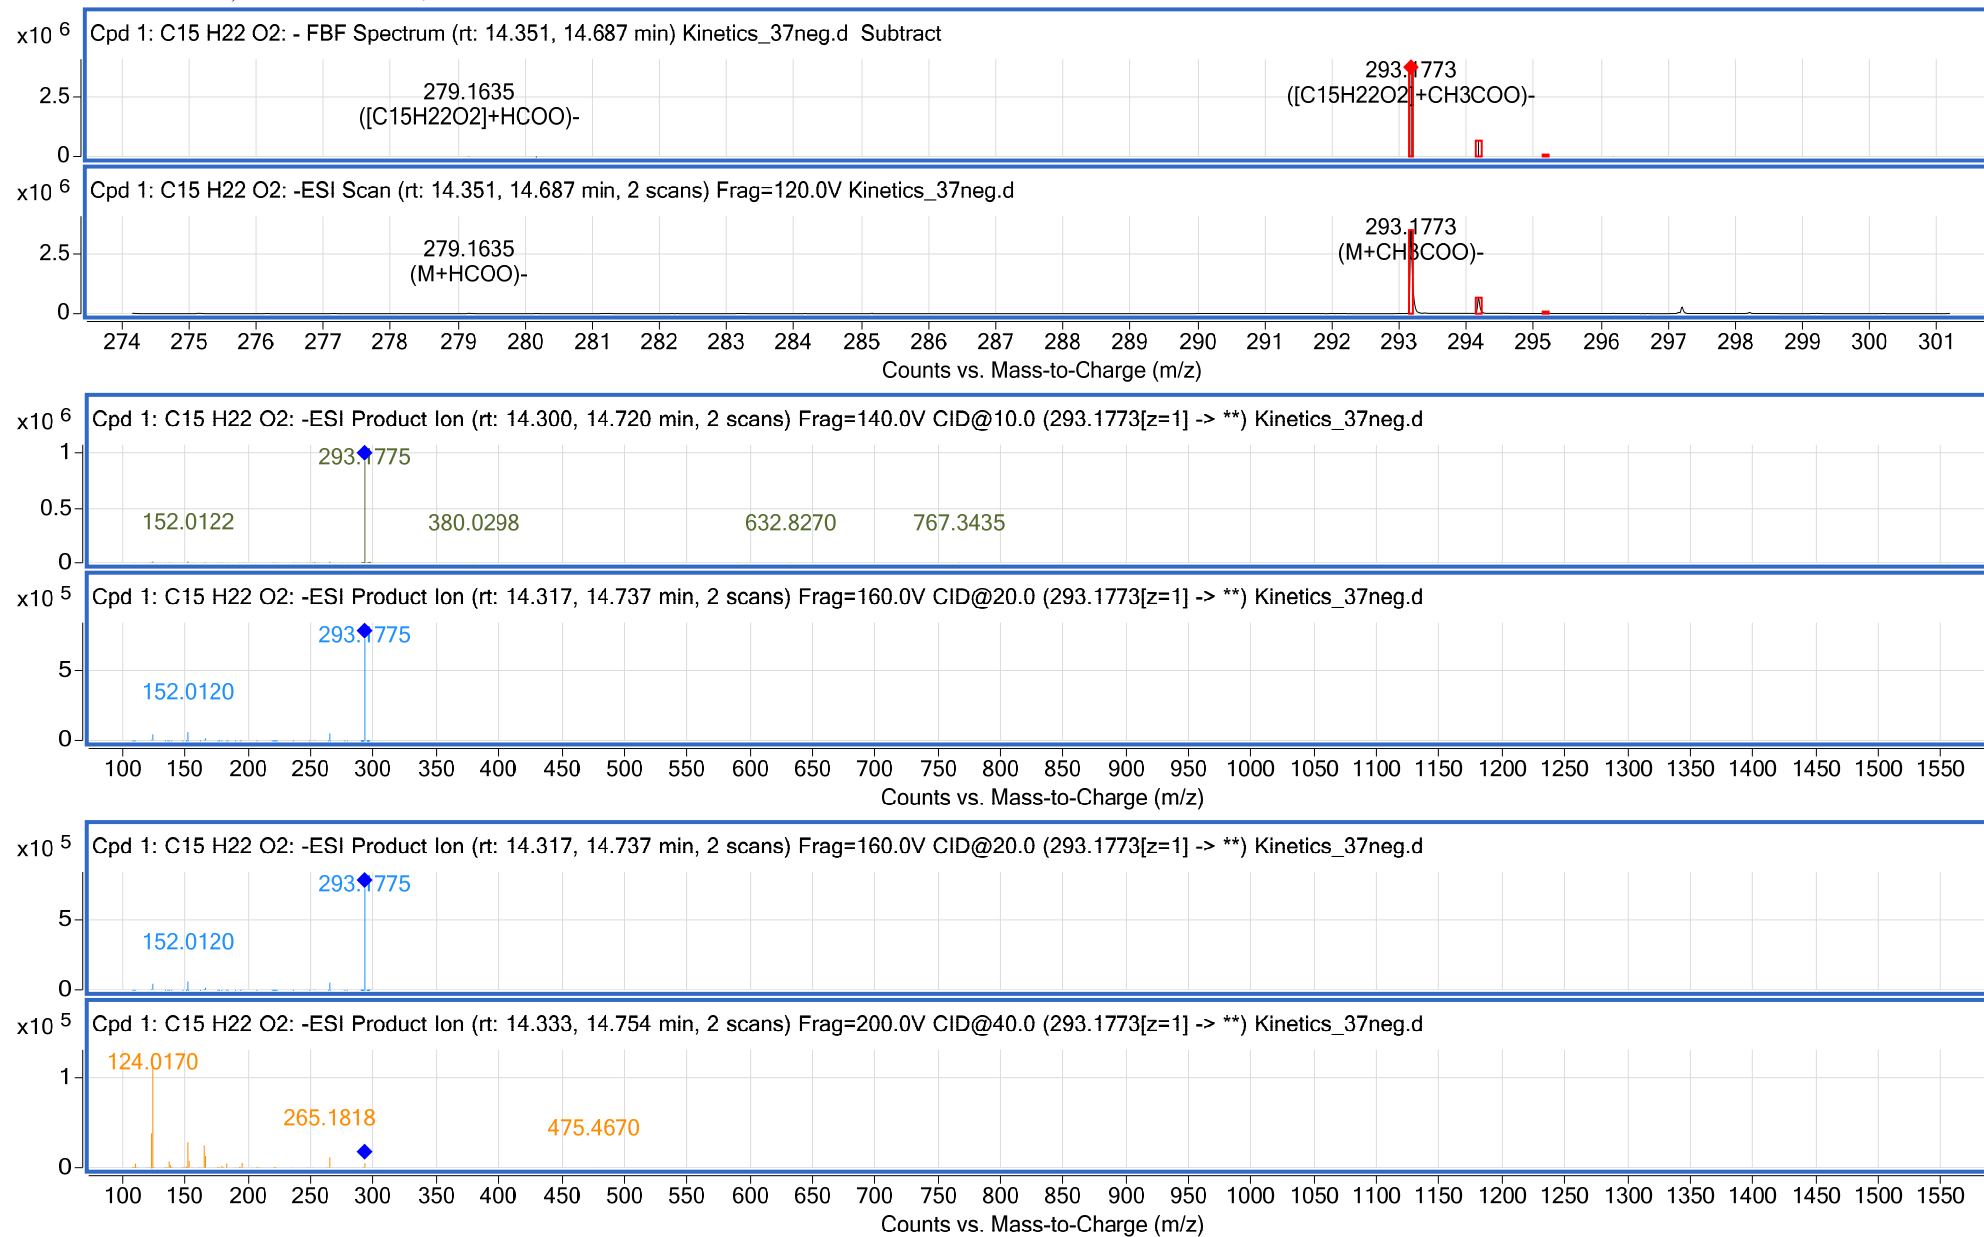

29. **C<sub>15</sub> H<sub>10</sub> O<sub>7</sub>, m/z-301.0367, Quercetin**

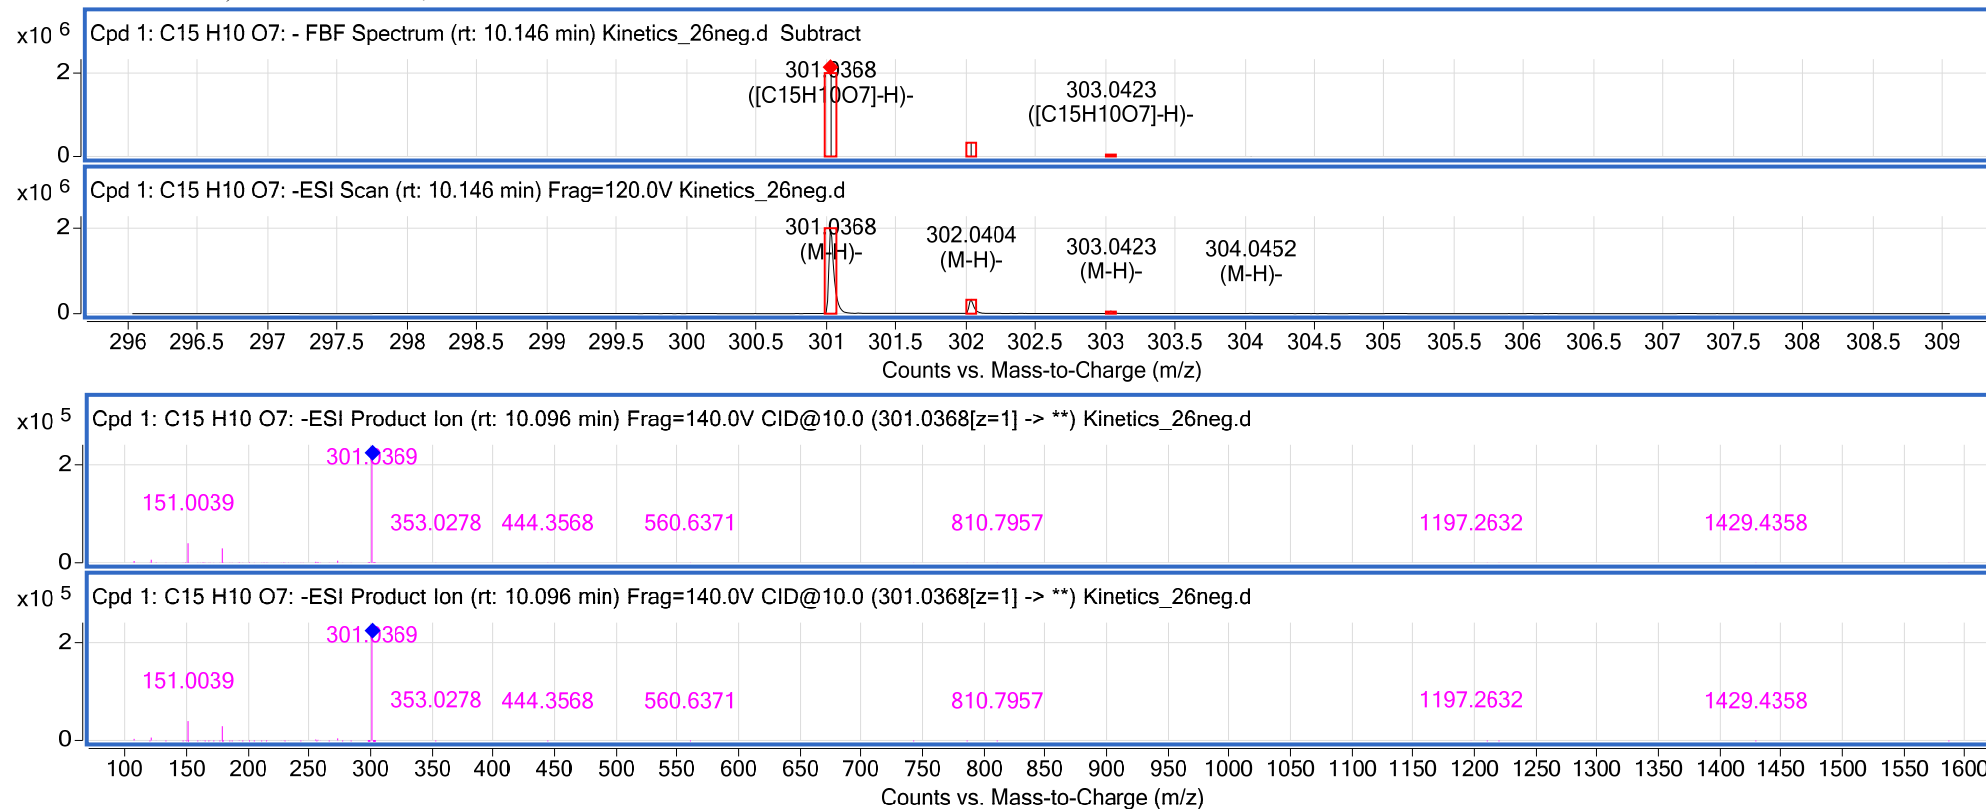

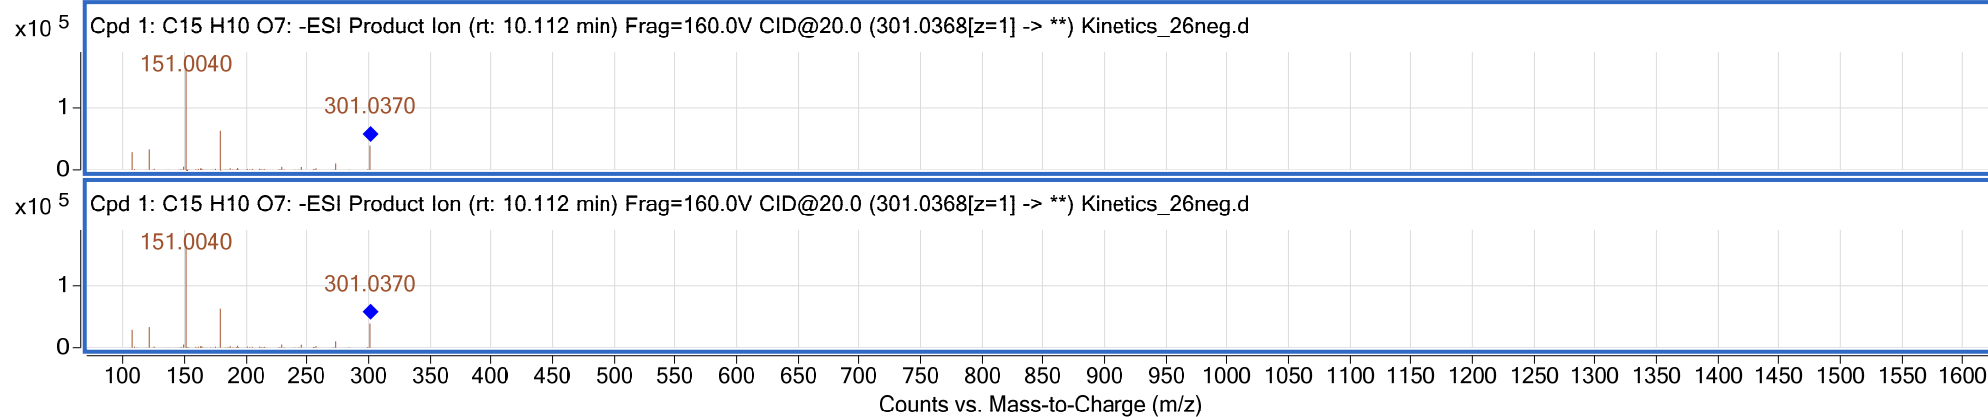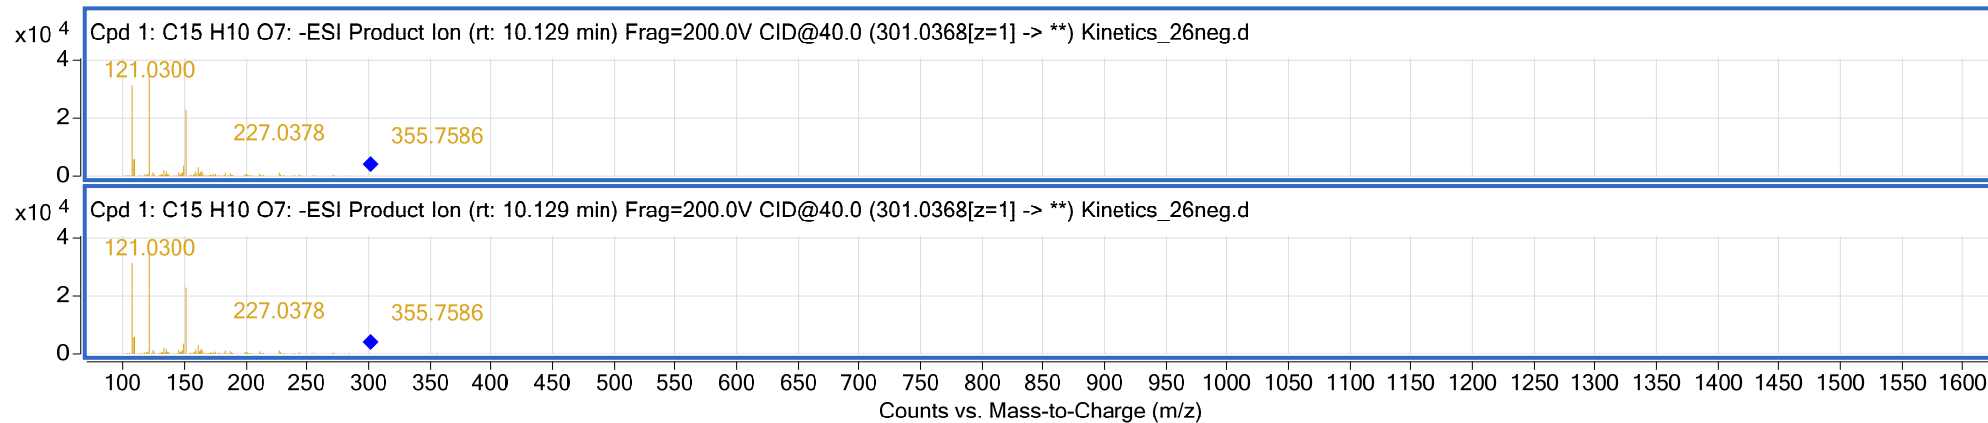



### 30. C<sub>19</sub> H<sub>30</sub> O<sub>4</sub>, m/z-321.2093, Rapanone

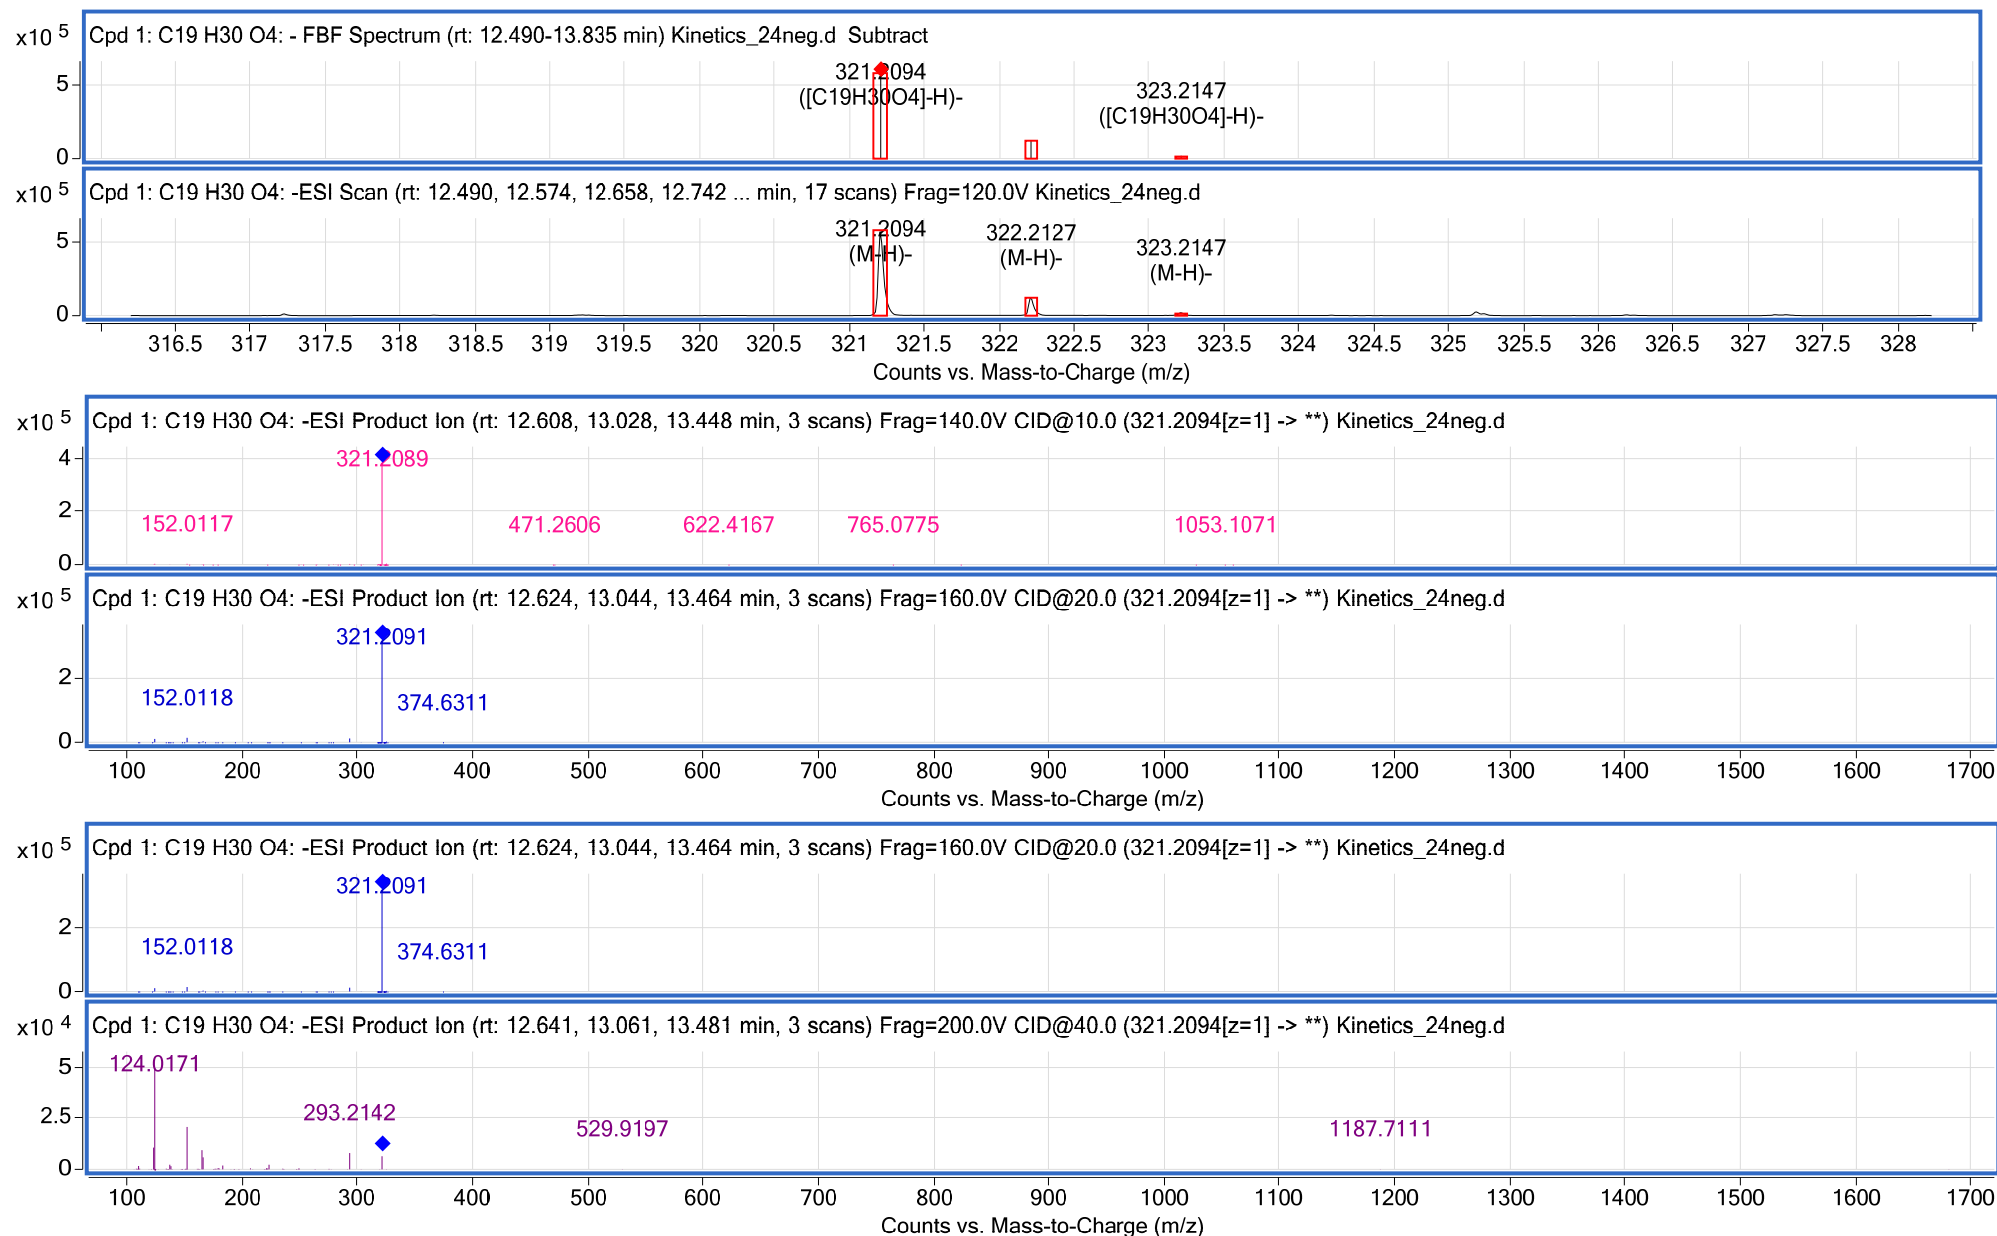

31. **C<sub>14</sub>H<sub>28</sub>, m/z-255.2338, Tetradecene**

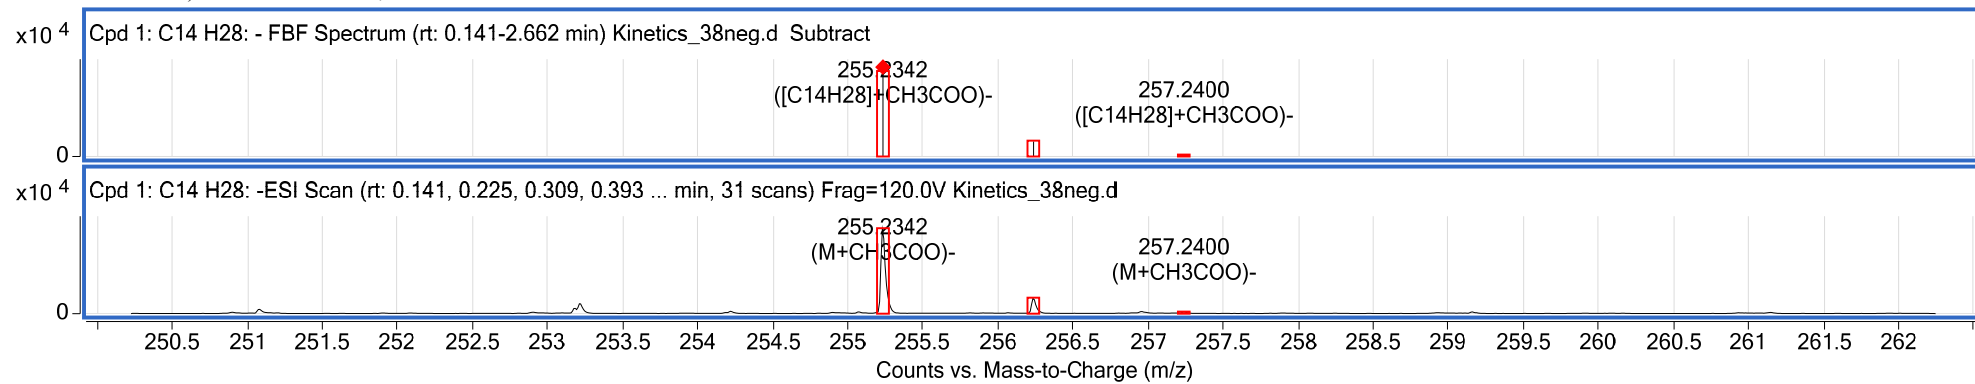

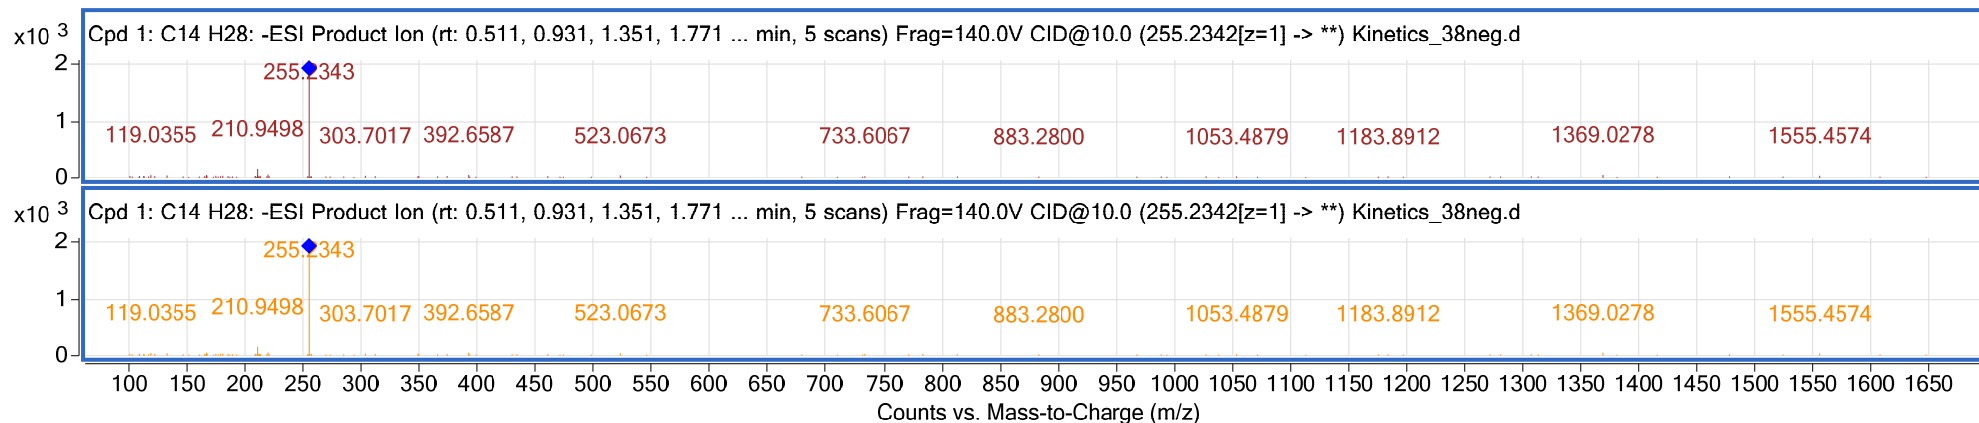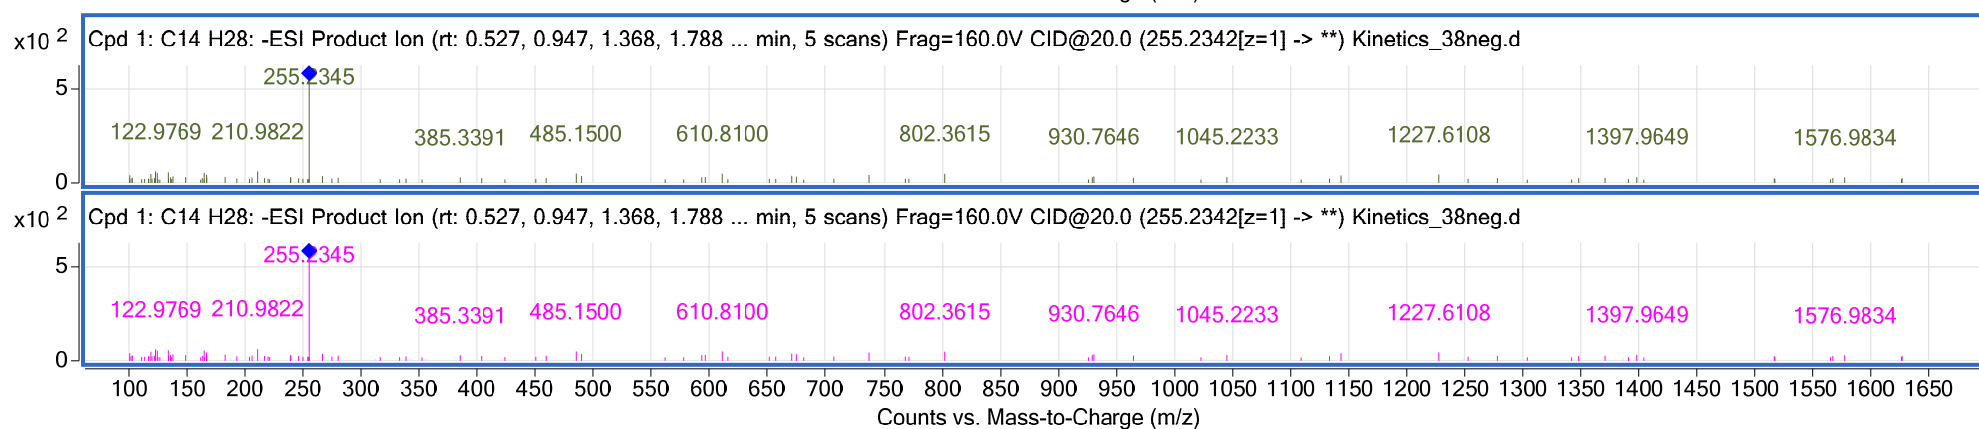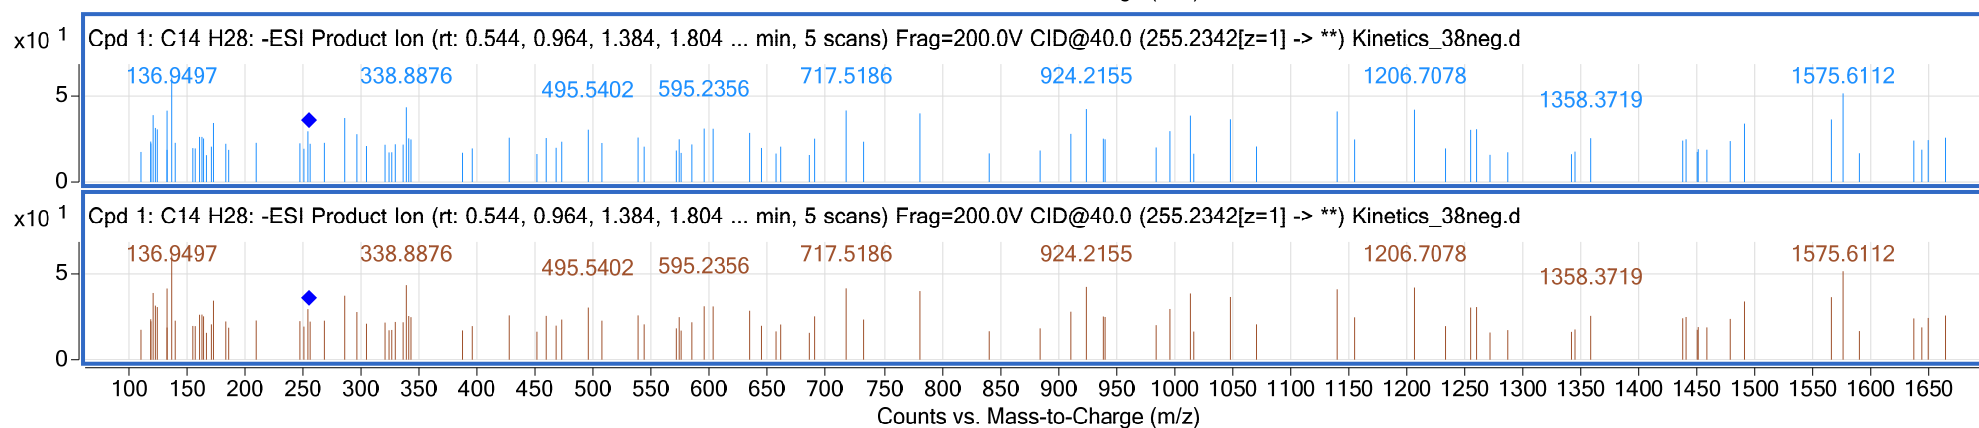

# 32. **C<sub>11</sub> H<sub>22</sub> O, m/z-229.1817, Undecan-2-one**

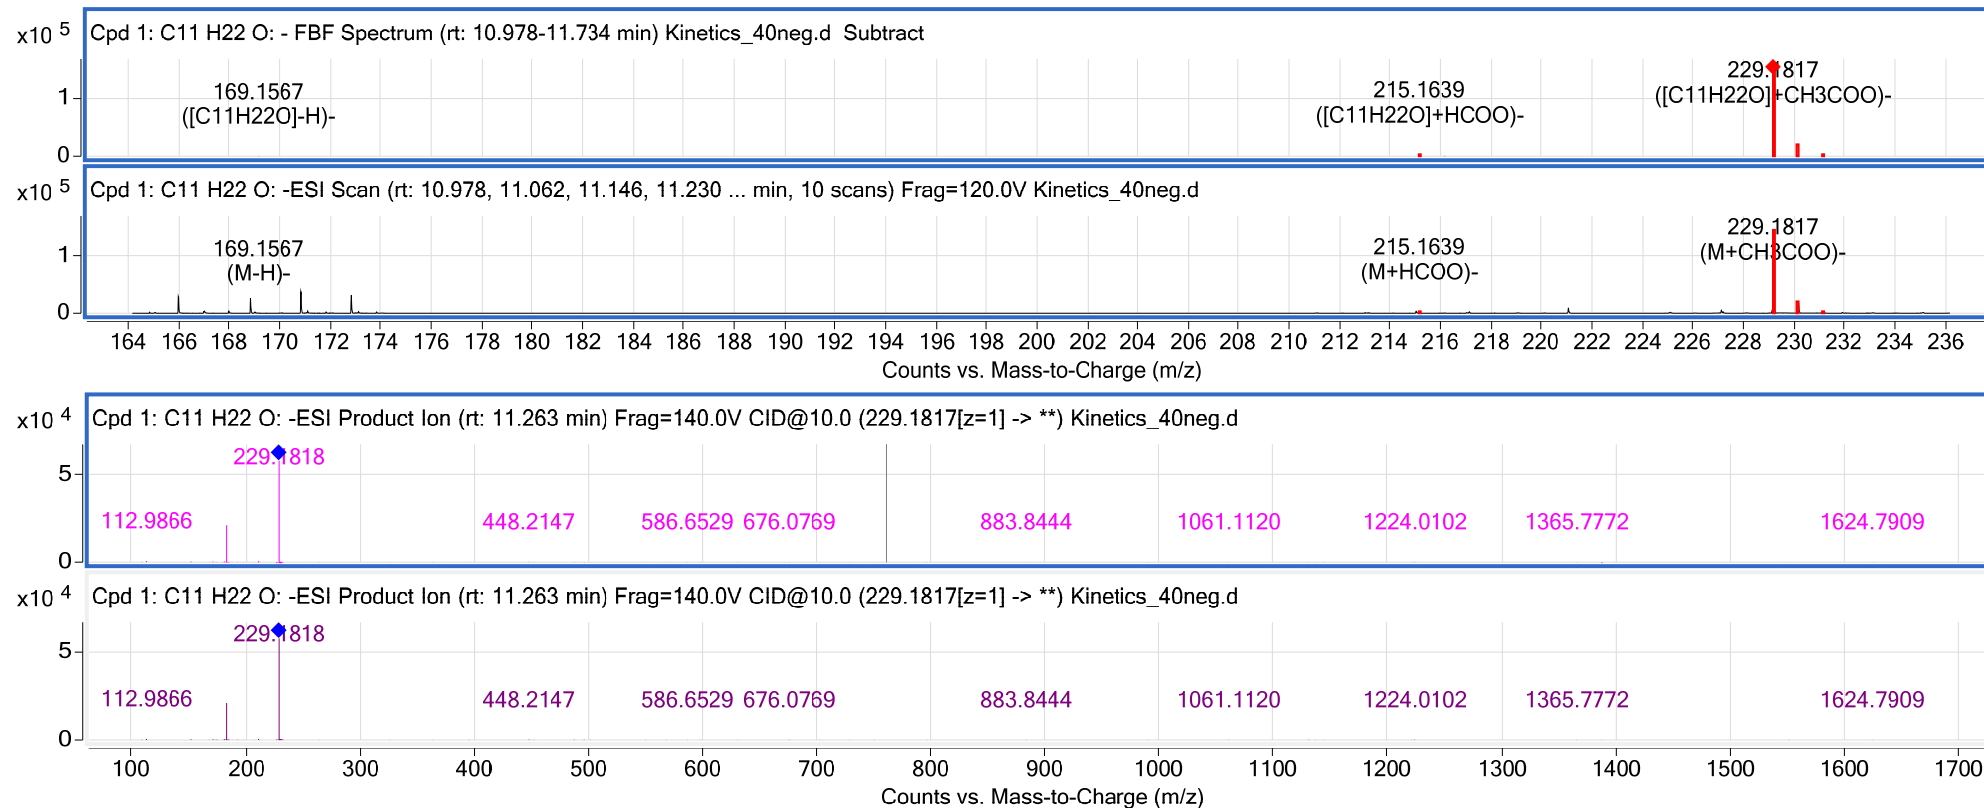

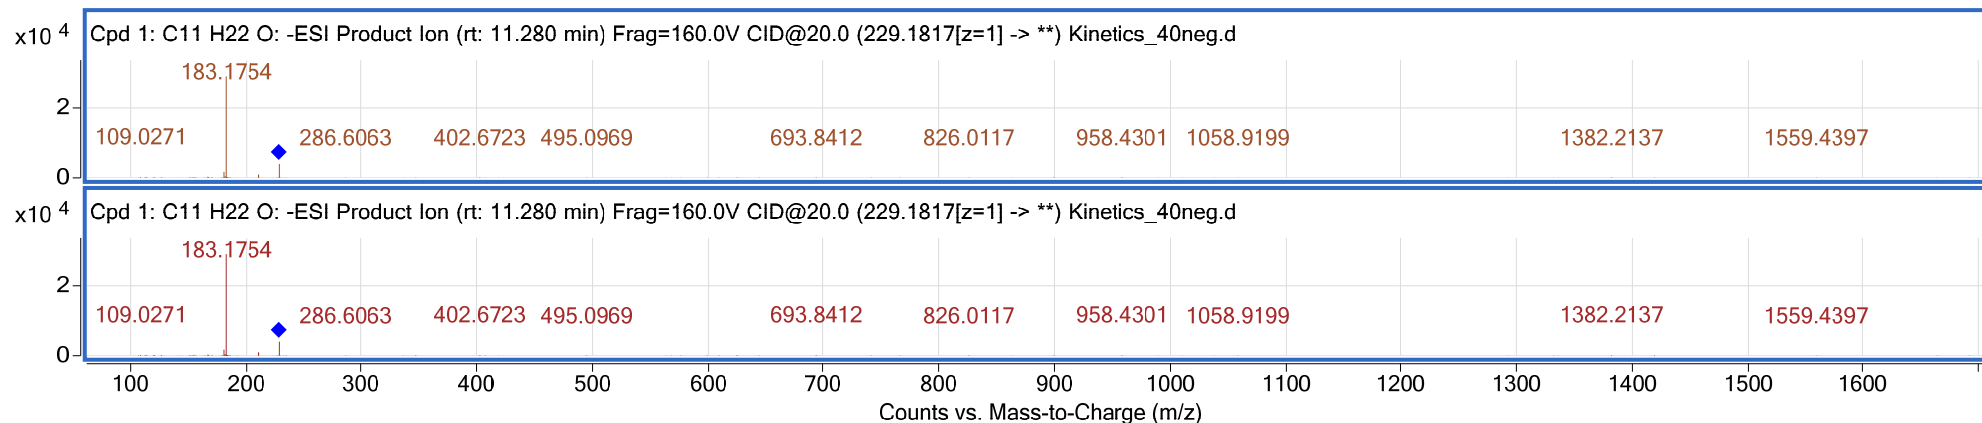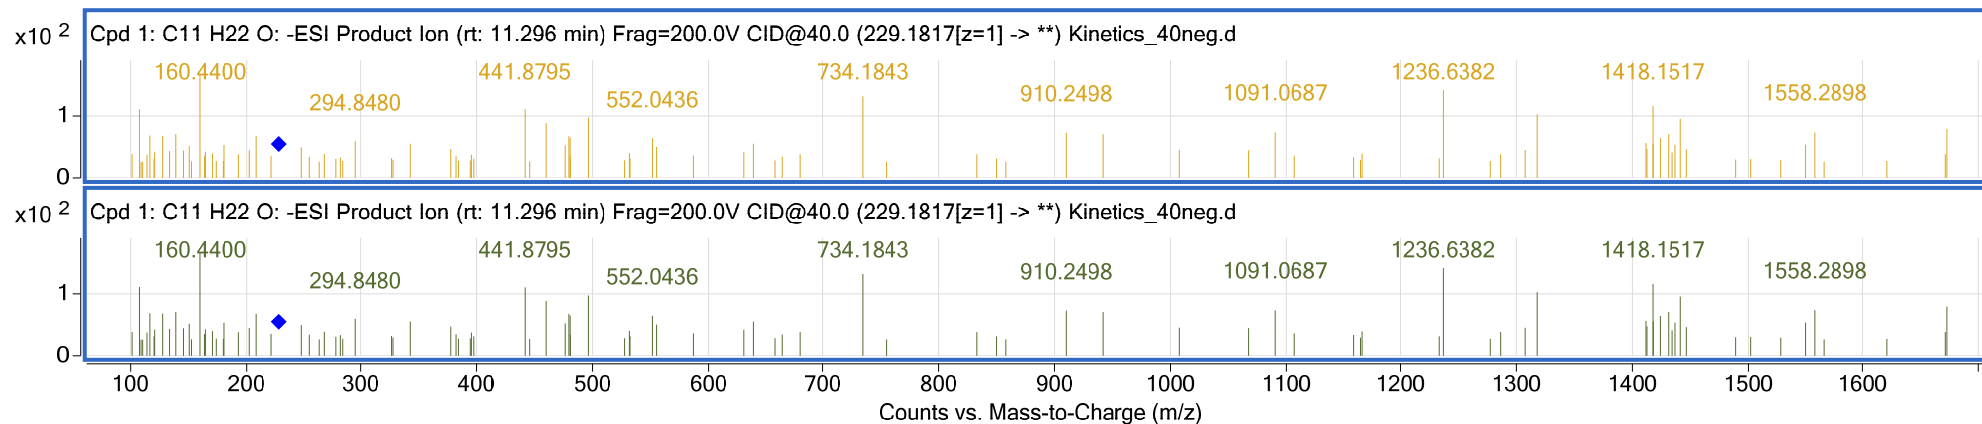

### 33. C<sub>8</sub>H<sub>8</sub>O<sub>4</sub>, m/z-167.0356, Vanillic acid

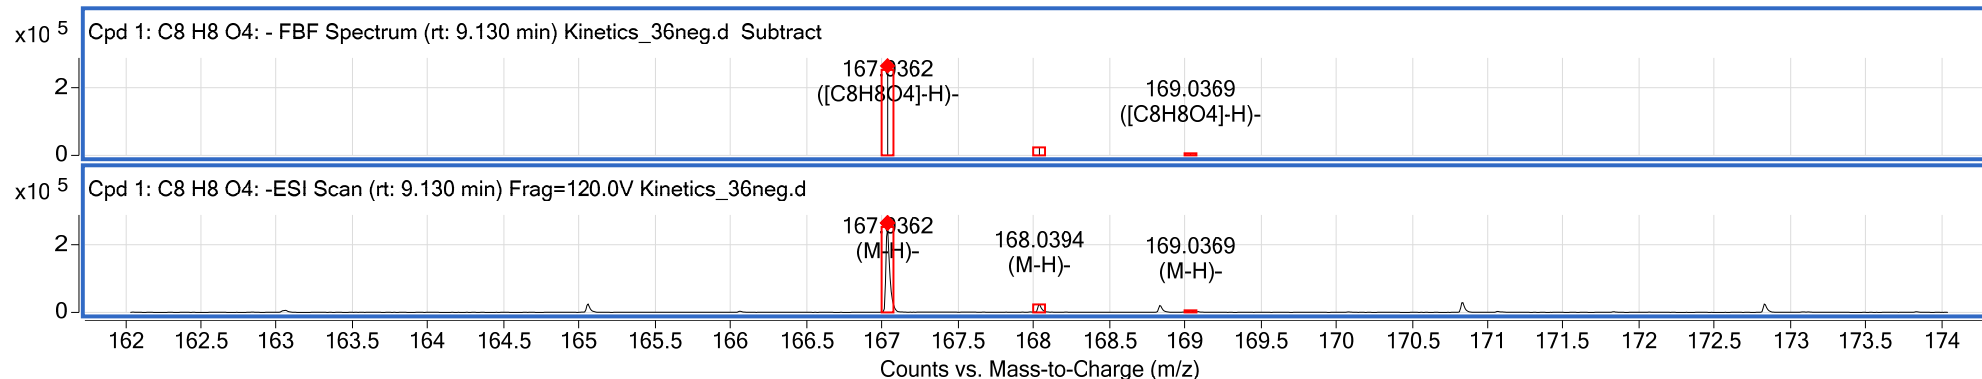

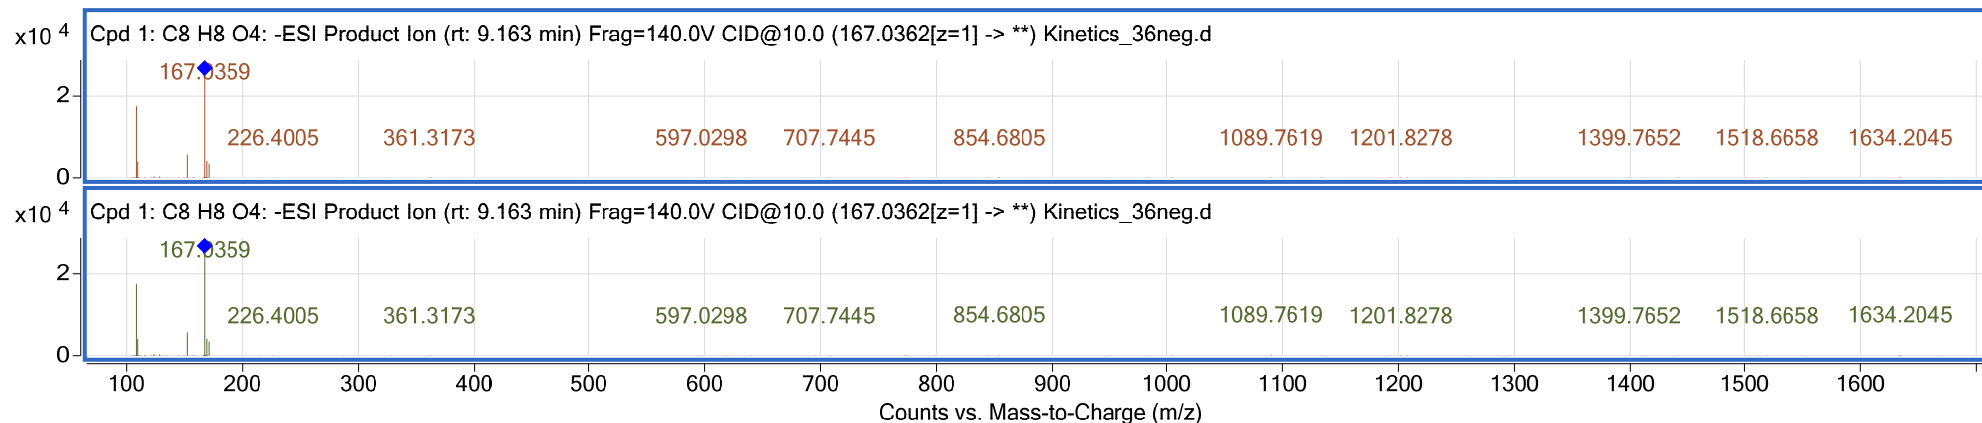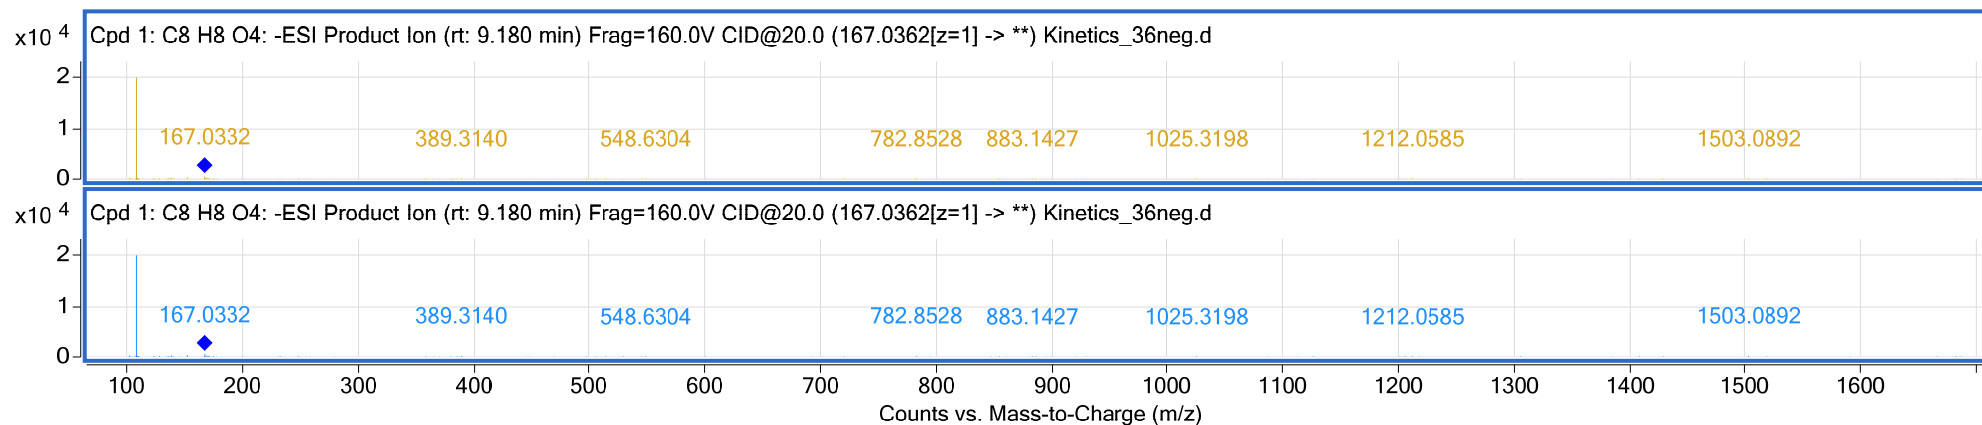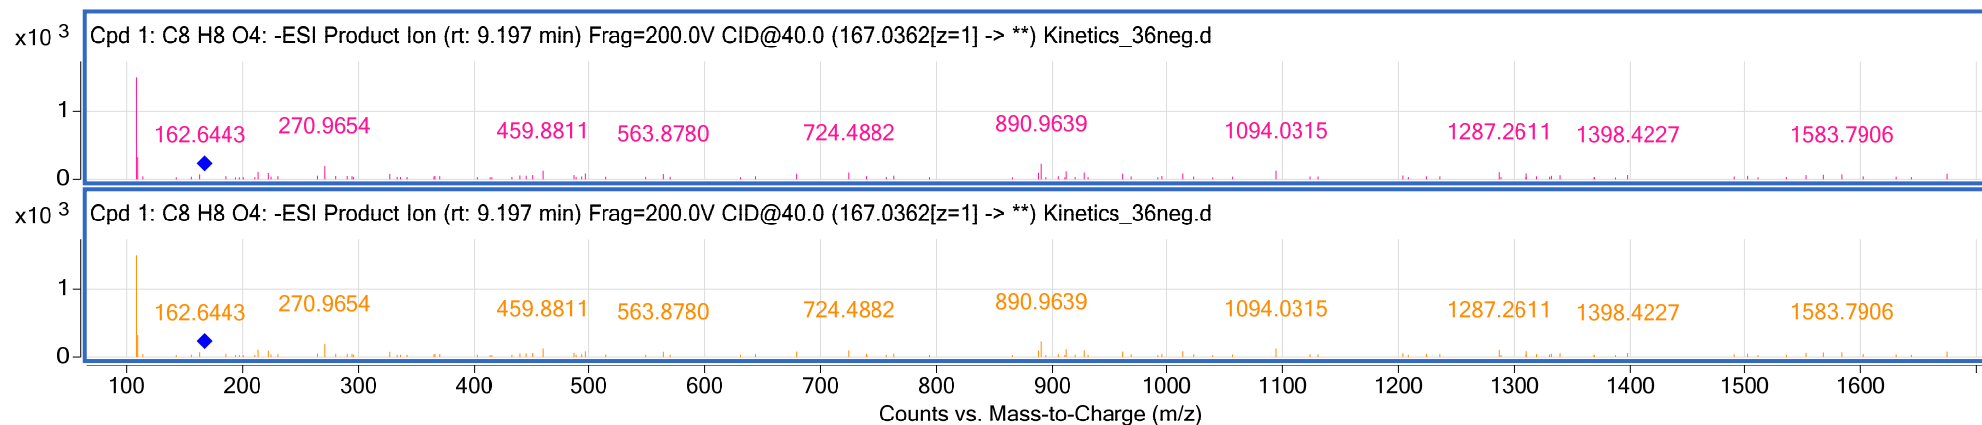

34.  $C_{18}H_{28}N_2O_4$ ,  $m/z$ -337.2135, Acebutolol

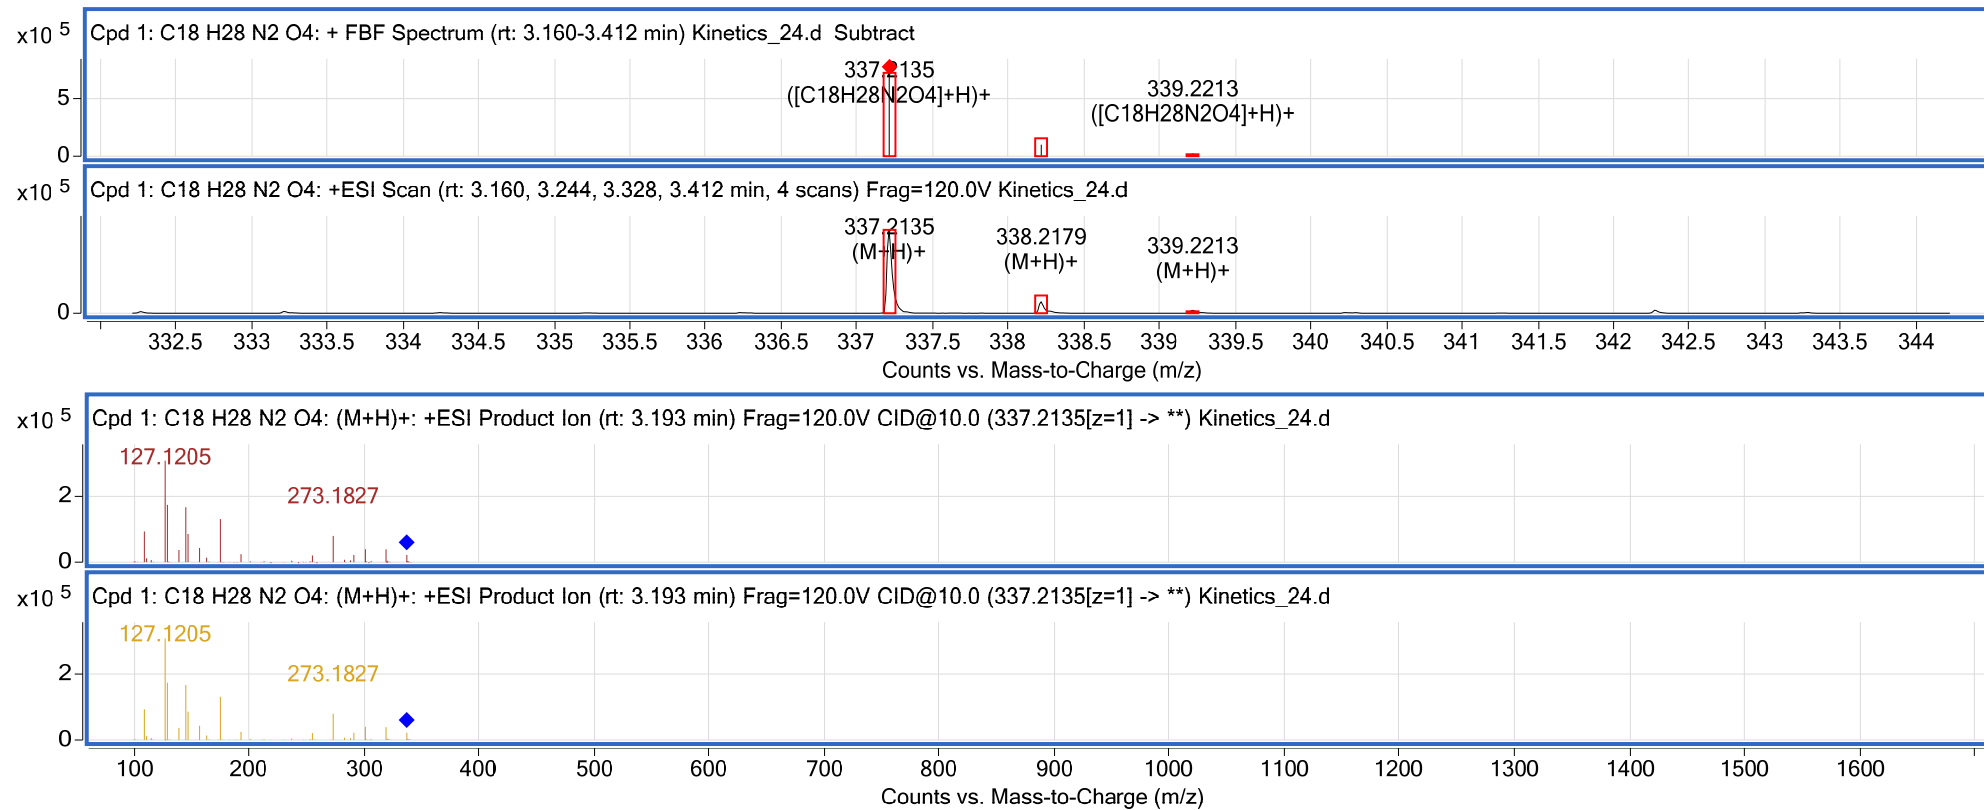

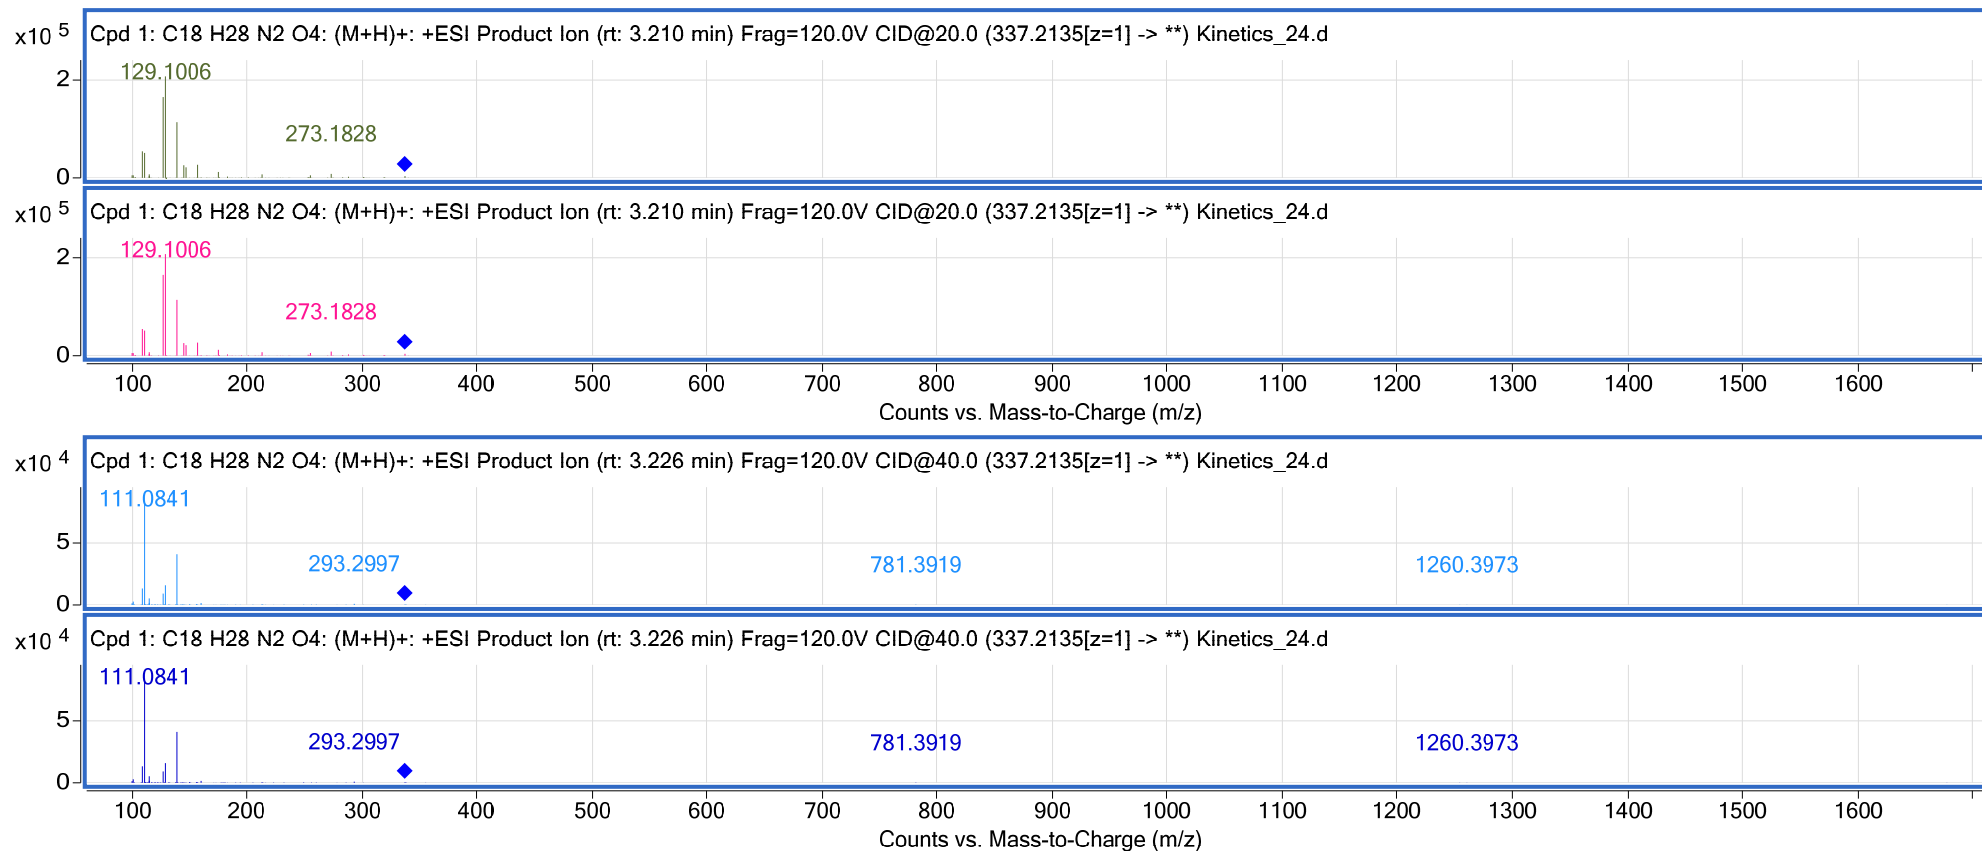

### 35. $C_{21}H_{30}O_2$ , m/z-337.2134, Cannabidiol

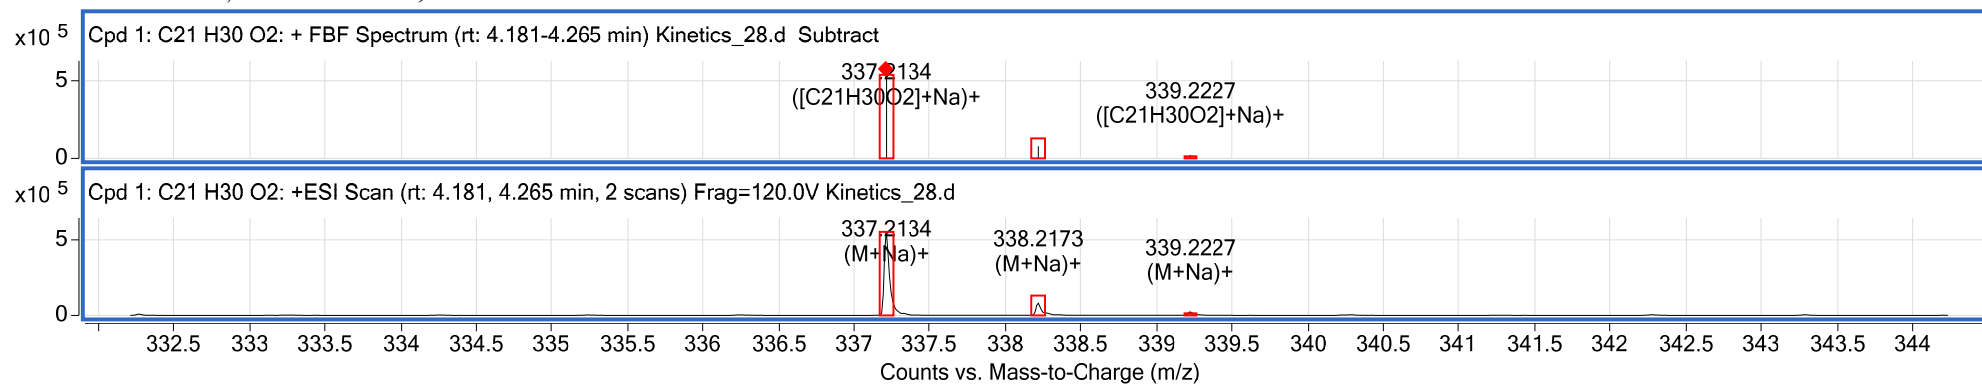



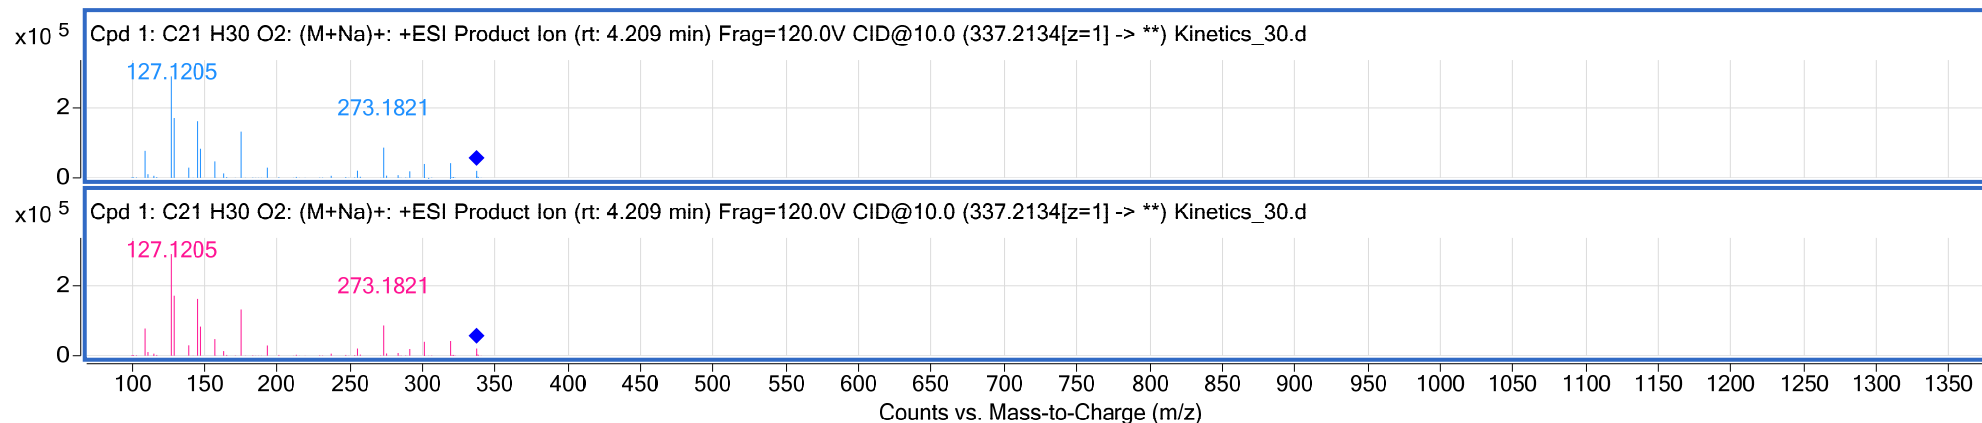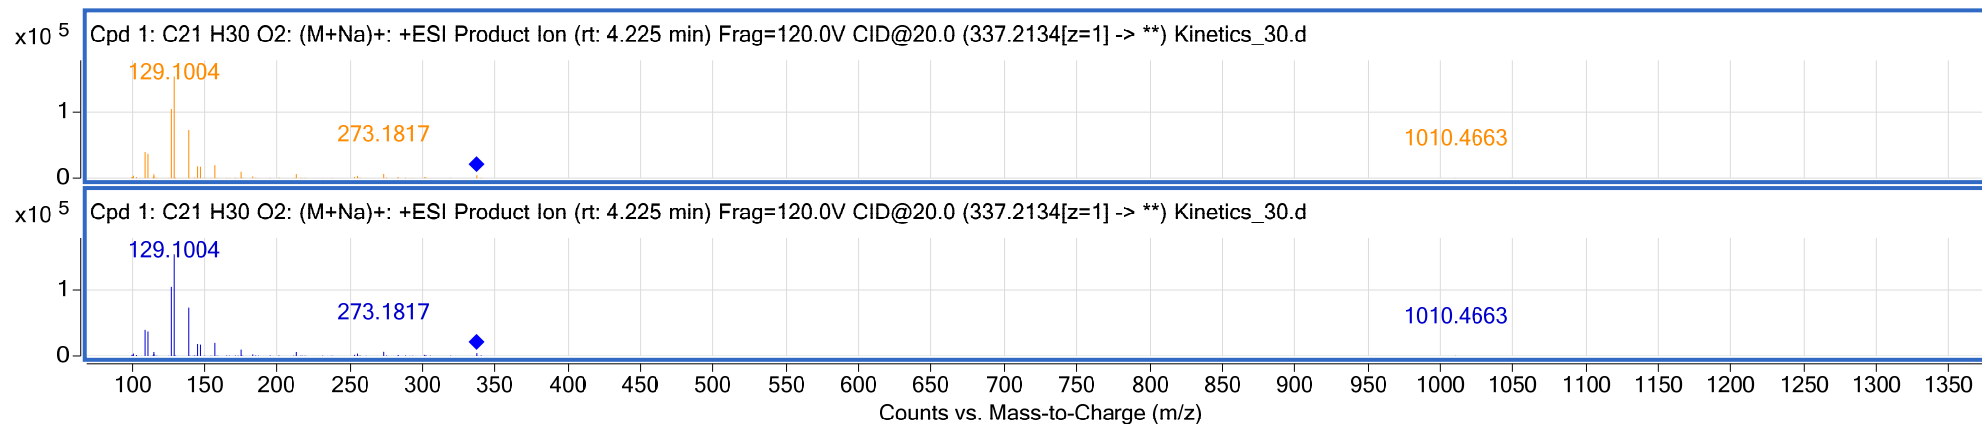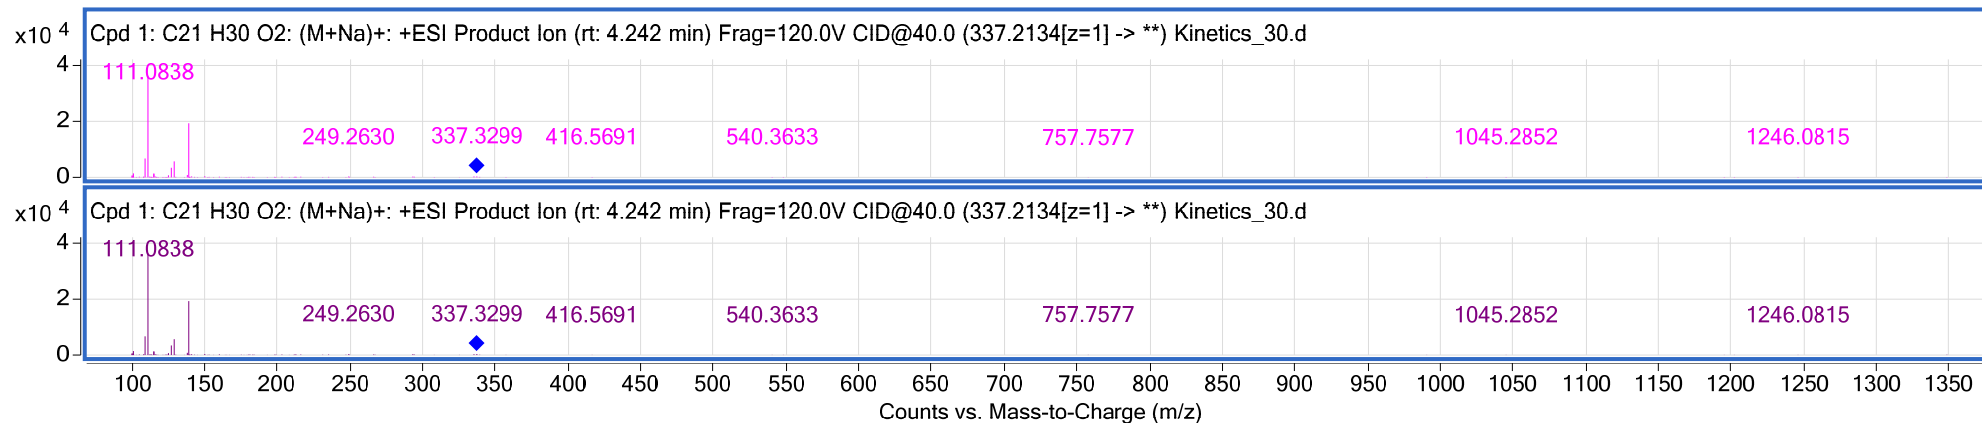

36.  $C_{12}H_{20}O_2$ ,  $m/z$ -219.1353, Hexenyl-(3z)-hexenoate (3z-)

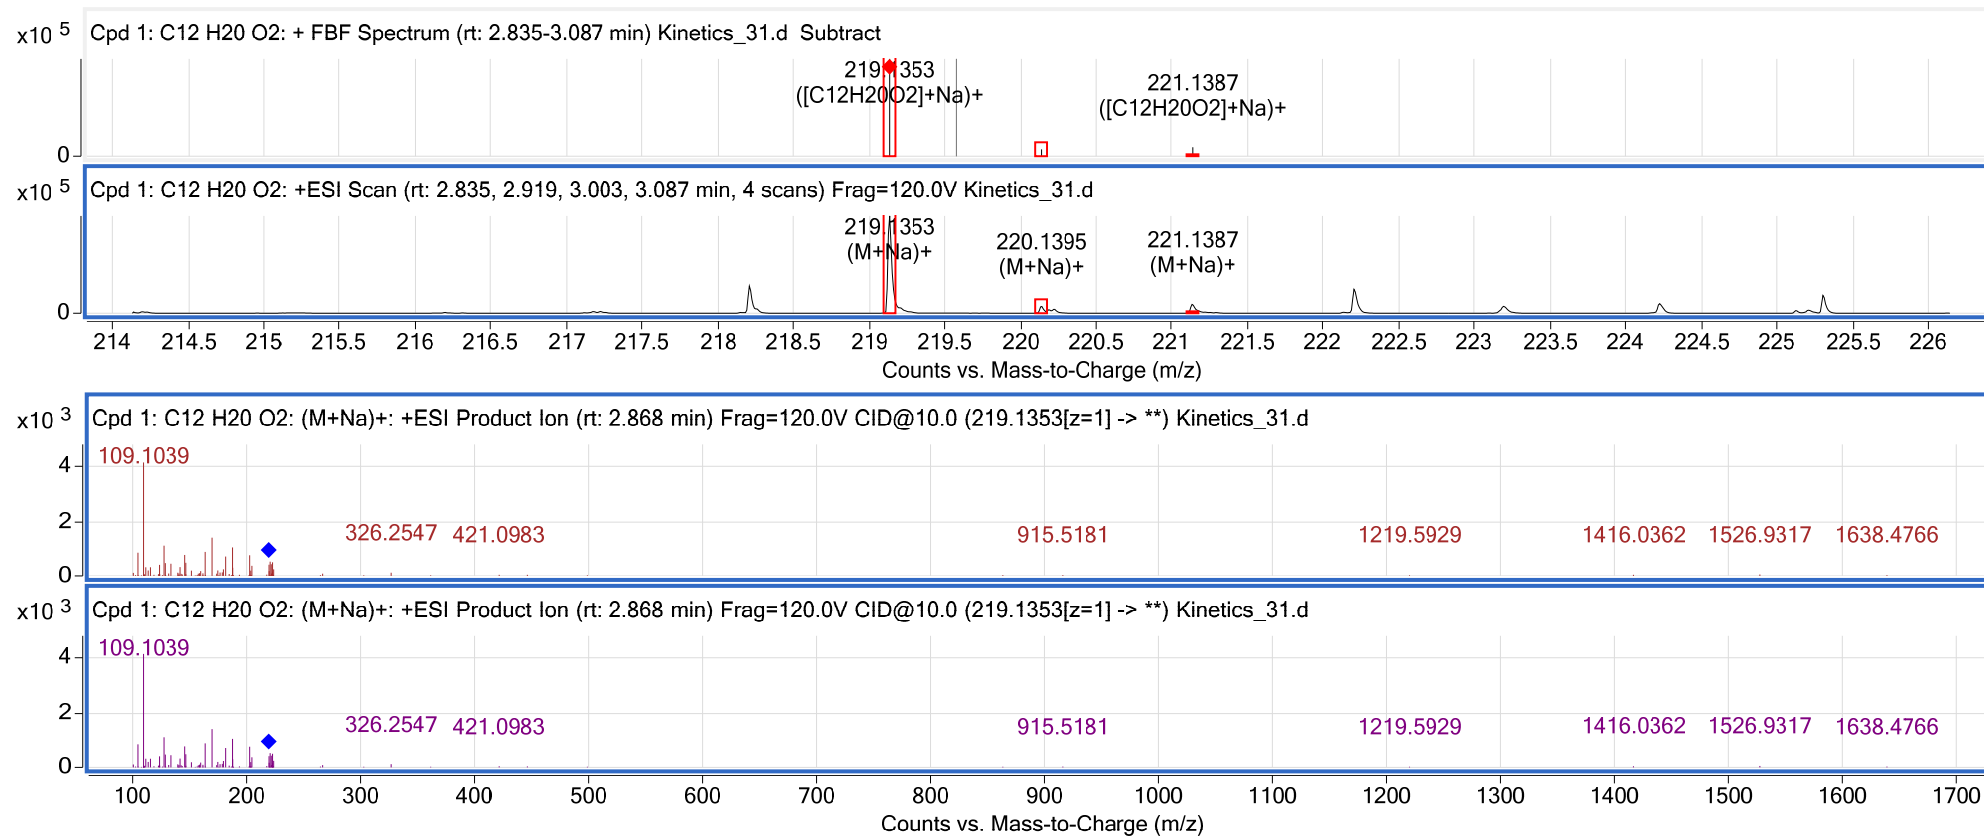

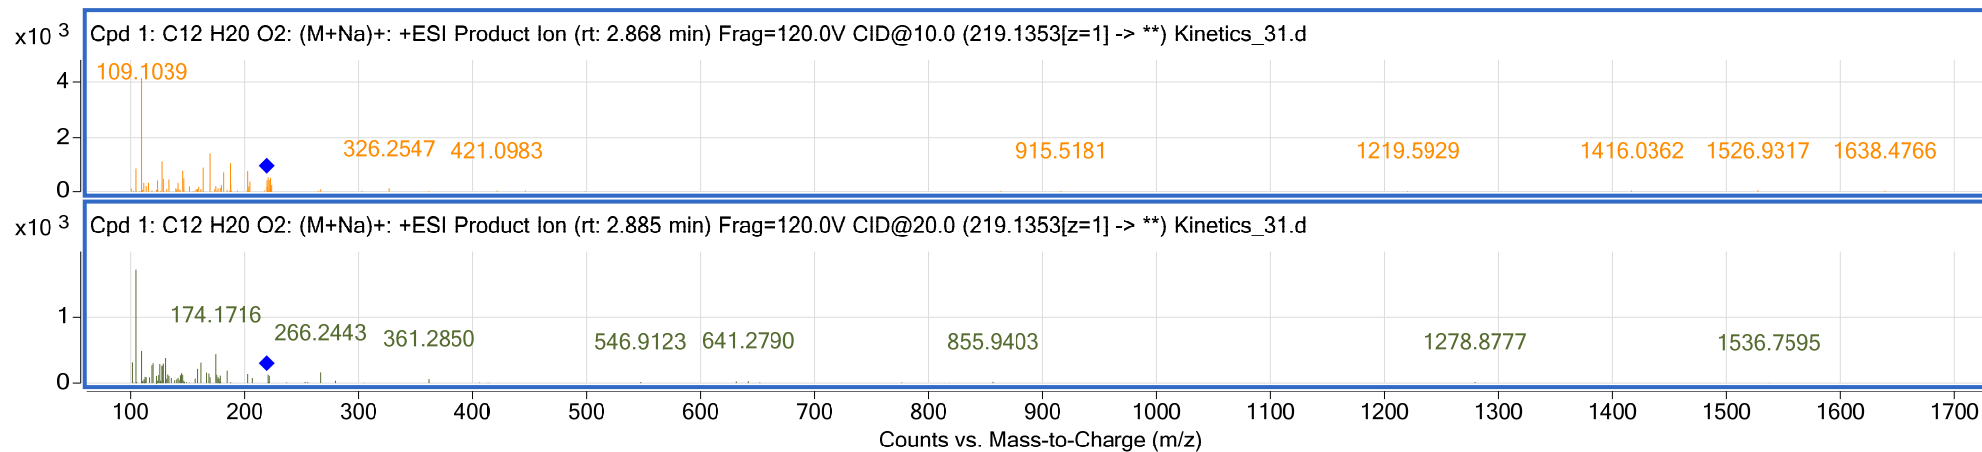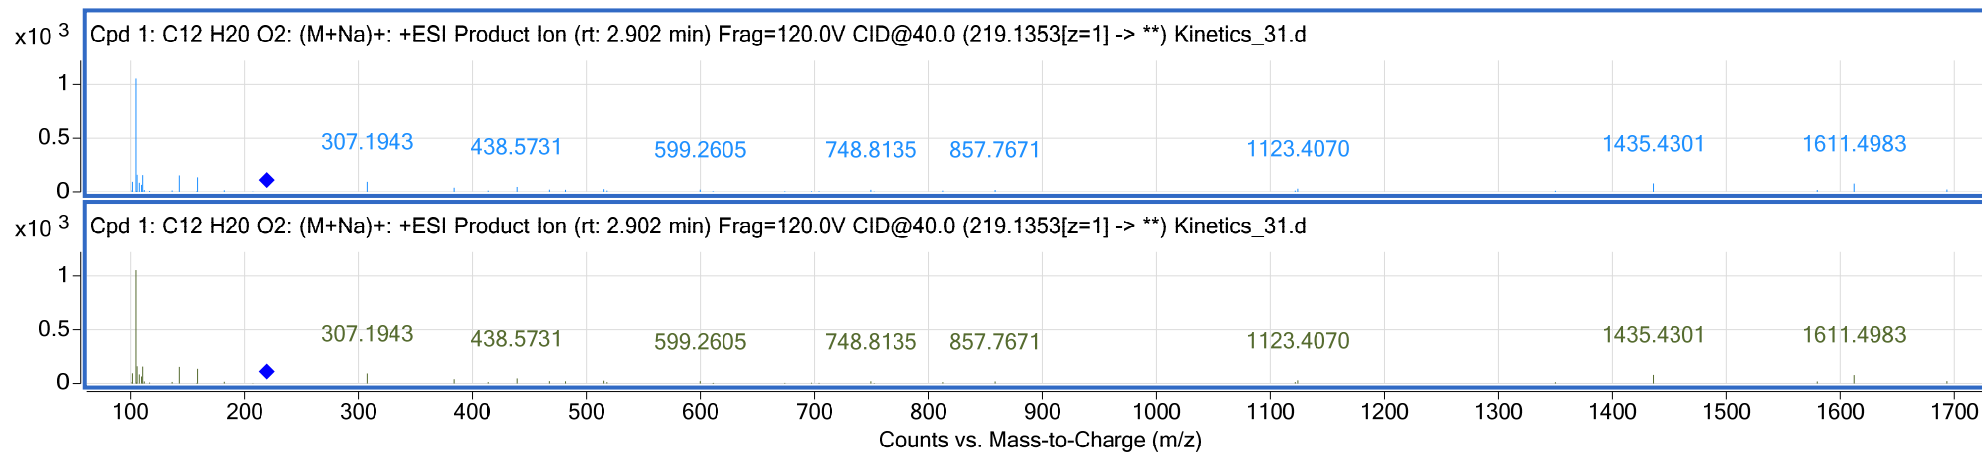

**Figure S3: Confirmation of Embelin from fruit samples.** Embelin standard (Sigma-Aldrich) and fruit extract of Embelia was subjected to HPLC and detected at 288 nm by DAD detector. (A) Peaks eluted from embelin standard and (B) embelia fruit sample are at the same retention time. Concentration of standard embelin was 0.125 ng ml<sup>-1</sup>.

**A**

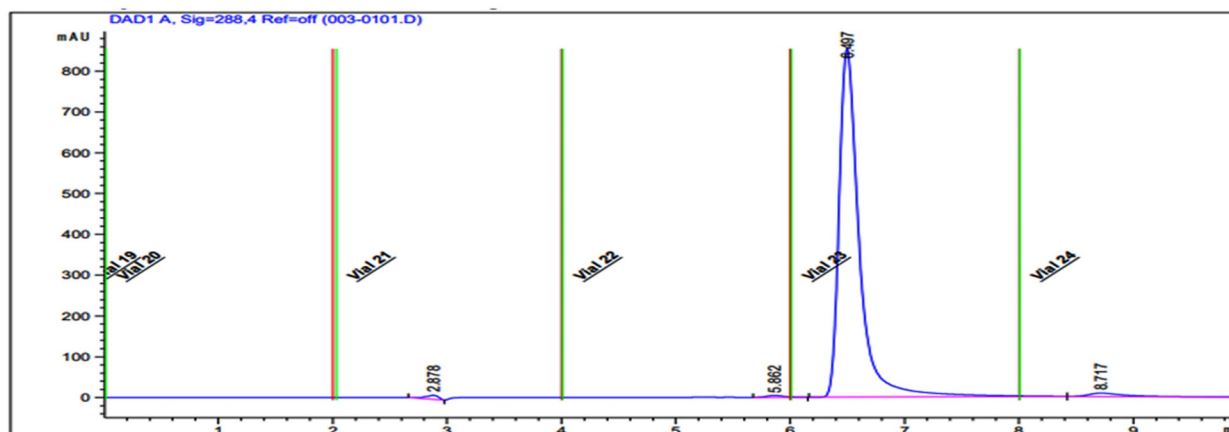

**B**

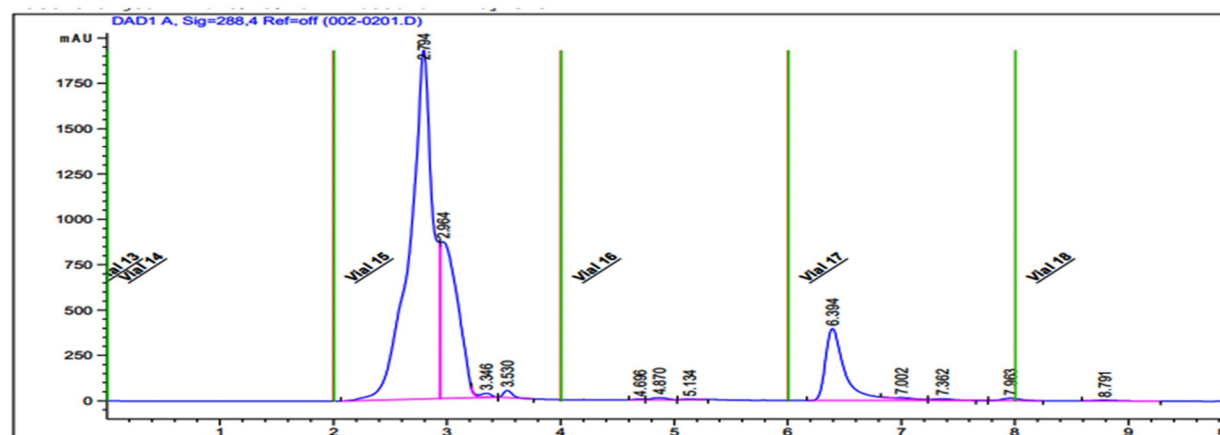

Retention time (min)
