# Supplementary material for: Assessing the Impact of Geographical Distribution and Genetic Diversity on Metabolic Profiles of a Medicinal Plant, Embelia ribes Burm. f
Source: MDPI journal article supplement (doi:10.3390/plants11212861), 2022-10-27
Supplement: s1 [file s1]

**Table S1: NCBI blast results for *matK* sequences.** *MatK* sequences obtained from *Embelia* accessions, *E. tsjeriam-cottam*, and *Measa indica* were analyzed for their similarity with the reported *Embelia* sequences using the blast function in the NCBI database. Table showed the query cover and percent similarity of obtained *makK* sequences with reported sequences of *Embelia*.

| Sr. No | Sample accessions    | Identification                 | Query cover (%) | Identity (%) |
|--------|----------------------|--------------------------------|-----------------|--------------|
| 1      | Manoli (Maharashtra) | <i>Embelia ribes</i>           | 92              | 99.87        |
| 2      | Kodkani (Karnataka)  | <i>Embelia ribes</i>           | 92              | 99.87        |
| 3      | Nadpal (Karnataka)   | <i>Embelia ribes</i>           | 93              | 99.87        |
| 4      | Wayanad (Kerala)     | <i>Embelia ribes</i>           | 92              | 99.87        |
| 5      | Outgroup-1           | <i>Embelia tsjeriam-cottam</i> | 87              | 99.77        |
| 6      | Outgroup-2           | <i>Measa indica</i>            | 89              | 98.38        |

**Table S2: Compounds identified tentatively in both positive and negative mode of LC-MS** (1-144 in negative mode and 145-149 in positive mode). Total 149 compounds that are present in all five biological replicates of any of the one accession, were tentatively identified based on the formulae from both positive and negative mode of LC-MS. N, Nadpal; K, Kodkani; M, Manoli; W, Wayanad.

| Sr No | Name                                                  | Formula                                         | Mass     | m/z      | RT     | Score | M | K | N | W |
|-------|-------------------------------------------------------|-------------------------------------------------|----------|----------|--------|-------|---|---|---|---|
| 1     | 3-Heptanone, 5-methyl                                 | C <sub>8</sub> H <sub>16</sub> O                | 128.1206 | 173.1188 | 9.298  | 86.07 | - | + | + | + |
| 2     | 6-Hydroxykaempferol-3-O-b-rutinoside6-O-b-D-glucoside | C <sub>10</sub> H <sub>20</sub> O <sub>2</sub>  | 172.147  | 217.1453 | 11.905 | 93.14 | - | - | - | + |
| 3     | Gigantol                                              | C <sub>16</sub> H <sub>18</sub> O <sub>4</sub>  | 274.1208 | 319.1189 | 7.797  | 80.77 | - | - | - | + |
| 4     | Multiflorin B                                         | C <sub>27</sub> H <sub>30</sub> O <sub>15</sub> | 594.1611 | 593.1536 | 7.285  | 85.76 | - | + | - | + |
| 5     | (-)-Linalool                                          | C <sub>10</sub> H <sub>18</sub> O               | 154.1362 | 199.1346 | 10.315 | 96.8  | - | + | - | + |
| 6     | (+/-)-N,N-Dimethyl menthyl succinamide                | C <sub>12</sub> H <sub>24</sub>                 | 168.187  | 227.201  | 11.234 | 82.82 | - | + | + | + |
| 7     | (S)-2-Methylbutanoic acid                             | C <sub>5</sub> H <sub>10</sub> O <sub>2</sub>   | 102.0685 | 161.0824 | 7.788  | 84.54 | - | + | - | + |
| 8     | 1,2,3-Trihydroxybenzene                               | C <sub>6</sub> H <sub>6</sub> O <sub>3</sub>    | 126.0319 | 125.0248 | 6.272  | 94.45 | - | + | - | + |
| 9     | 1,2-Benzoquinone                                      | C <sub>6</sub> H <sub>4</sub> O <sub>2</sub>    | 108.0217 | 167.0356 | 9.141  | 97.34 | - | - | + | - |
| 10    | 1,2-Epoxy-3,4-butanediol 4-methanesulfonate           | C <sub>5</sub> H <sub>10</sub> O <sub>5</sub> S | 182.025  | 227.0226 | 7.458  | 83.96 | - | + | - | - |
| 11    | 1,4-Dihydroxyanthraquinone                            | C <sub>14</sub> H <sub>8</sub> O <sub>4</sub>   | 240.0433 | 299.058  | 10.898 | 86.12 | - | + | + | - |
| 12    | 13-Tetradecanolide                                    | C <sub>14</sub> H <sub>26</sub> O <sub>2</sub>  | 226.1943 | 271.1925 | 15.688 | 91.46 | - | + | - | - |
| 13    | 16,17-Epiestriol                                      | C <sub>18</sub> H <sub>24</sub> O <sub>3</sub>  | 288.174  | 347.1881 | 14.096 | 76.26 | - | + | - | - |
| 14    | 1-Monopalmitin                                        | C <sub>19</sub> H <sub>38</sub> O <sub>4</sub>  | 330.2786 | 375.2774 | 10.646 | 83.79 | - | + | - | + |
| 15    | 1-Pentadecene                                         | C <sub>15</sub> H <sub>30</sub>                 | 210.2355 | 255.2337 | 4.679  | 96.49 | - | + | - | + |
| 16    | 1-Pentanesulfenothioic acid                           | C <sub>5</sub> H <sub>12</sub> S <sub>2</sub>   | 136.0381 | 195.0517 | 2.999  | 81.86 | - | + | - | + |
| 17    | 2,2-Dimethylglutaric acid                             | C <sub>7</sub> H <sub>12</sub> O <sub>4</sub>   | 160.0732 | 205.0722 | 7.368  | 83.03 | + | - | - | + |
| 18    | 2,3-Dihydroxy-3-methylvaleric acid                    | C <sub>6</sub> H <sub>12</sub> O <sub>4</sub>   | 148.0734 | 147.0666 | 6.528  | 86.23 | - | + | - | - |
| 19    | 2,3-Dimethylmaleate                                   | C <sub>6</sub> H <sub>8</sub> O <sub>4</sub>    | 144.0428 | 143.0358 | 3.004  | 72.06 | - | - | + | - |

| Sr No | Name                                                                                                                                                                     | Formula                                         | Mass     | m/z      | RT     | Score | M | K | N | W |
|-------|--------------------------------------------------------------------------------------------------------------------------------------------------------------------------|-------------------------------------------------|----------|----------|--------|-------|---|---|---|---|
| 20    | 25-Hydroxyvitamin D2                                                                                                                                                     | C <sub>28</sub> H <sub>44</sub> O <sub>2</sub>  | 412.3335 | 411.3262 | 13.257 | 79.68 | - | + | - | + |
| 21    | 2-Formylglutarate                                                                                                                                                        | C <sub>6</sub> H <sub>8</sub> O <sub>5</sub>    | 160.0379 | 205.0361 | 6.365  | 97.27 | + | + | + | + |
| 22    | 2-Hexyldecanoic acid                                                                                                                                                     | C <sub>16</sub> H <sub>32</sub> O <sub>2</sub>  | 256.2413 | 255.2341 | 8.466  | 93.3  | - | + | + | + |
| 23    | 2-Methyl-3'-hydroxyphenylpropionic acid                                                                                                                                  | C <sub>10</sub> H <sub>12</sub> O <sub>3</sub>  | 180.0795 | 225.0777 | 9.642  | 94.75 | - | + | - | + |
| 24    | 2-Methylene dodecanoic acid                                                                                                                                              | C <sub>13</sub> H <sub>24</sub> O <sub>2</sub>  | 212.1779 | 271.1918 | 15.260 | 86.09 | + | + | - | + |
| 25    | 2-Propylglutaric acid                                                                                                                                                    | C <sub>8</sub> H <sub>14</sub> O <sub>4</sub>   | 174.0897 | 173.0825 | 8.634  | 85.09 | - | + | - | + |
| 26    | 3-(4-Hydroxy-3-methoxyphenyl)propionic acid                                                                                                                              | C <sub>10</sub> H <sub>12</sub> O <sub>4</sub>  | 196.074  | 241.0724 | 6.695  | 80.13 | - | + | - | - |
| 27    | 3,4,5-Trihydroxyflavanone                                                                                                                                                | C <sub>15</sub> H <sub>10</sub> O <sub>5</sub>  | 270.0548 | 315.0528 | 10.814 | 90.25 | - | + | - | + |
| 28    | 3,4-Dihydroxybutyric acid                                                                                                                                                | C <sub>4</sub> H <sub>8</sub> O <sub>4</sub>    | 120.0425 | 179.0566 | 3.761  | 96.11 | + | + | - | + |
| 29    | 3,4-Dimethyl valeric acid                                                                                                                                                | C <sub>7</sub> H <sub>14</sub> O <sub>2</sub>   | 130.0998 | 175.0981 | 9.969  | 85.41 | - | + | - | - |
| 30    | 3-[(2S,3R,4S,5S,6R)-4,5-Dihydroxy-6-(hydroxymethyl)-3-[(2S,3R,4S,5R)-3,4,5-trihydroxyoxan-2-yl]oxyoxan-2-yl]oxy-2-(3,4-dihydroxyphenyl)-5-hydroxy-7-methoxychromen-4-one | C <sub>27</sub> H <sub>30</sub> O <sub>16</sub> | 610.1571 | 609.1497 | 7.957  | 81.38 | - | + | - | + |
| 31    | 3-Amino-3-(4-hydroxyphenyl)propanoate                                                                                                                                    | C <sub>9</sub> H <sub>11</sub> N O <sub>3</sub> | 181.0742 | 180.0669 | 4.596  | 84.77 | - | + | - | + |
| 32    | 3-Furoic acid                                                                                                                                                            | C <sub>5</sub> H <sub>4</sub> O <sub>3</sub>    | 112.0166 | 111.0093 | 6.024  | 85.76 | - | - | - | + |
| 33    | 3-Hydroxycapric acid                                                                                                                                                     | C <sub>10</sub> H <sub>20</sub> O <sub>3</sub>  | 188.1422 | 187.1349 | 12.831 | 95.57 | - | + | - | + |
| 34    | 3-Hydroxydodecanoic acid                                                                                                                                                 | C <sub>12</sub> H <sub>24</sub> O <sub>3</sub>  | 216.1734 | 215.1664 | 14.18  | 83.07 | - | - | + | + |
| 35    | 3-Hydroxyvalproic acid                                                                                                                                                   | C <sub>8</sub> H <sub>16</sub> O <sub>3</sub>   | 160.1098 | 159.1026 | 10.221 | 85.39 | + | + | - | + |
| 36    | 3-Isopropylmalic acid                                                                                                                                                    | C <sub>7</sub> H <sub>12</sub> O <sub>5</sub>   | 176.0691 | 175.062  | 7.71   | 96.44 | - | + | - | + |
| 37    | 3-Methyl-3-butenyl 3-methylbutanoate                                                                                                                                     | C <sub>10</sub> H <sub>18</sub> O <sub>2</sub>  | 170.1314 | 215.1297 | 10.654 | 96.42 | - | + | - | - |
| Sr No | Name                                                                                                                                                                     | Formula                                         | Mass     | m/z      | RT     | Score | M | K | N | W |

| 38    | 3-o-Ethyl-L-ascorbic acid                                   | C <sub>8</sub> H <sub>12</sub> O <sub>6</sub>               | 204.0636 | 263.0783 | 7.037  | 75.14 | - | + | - | - |
|-------|-------------------------------------------------------------|-------------------------------------------------------------|----------|----------|--------|-------|---|---|---|---|
| 39    | 4-Hydroxycyclohexylacetic acid                              | C <sub>8</sub> H <sub>14</sub> O <sub>3</sub>               | 158.0945 | 157.0874 | 11.571 | 87.9  | - | - | - | + |
| 40    | 4'-Hydroxyfenoprofen                                        | C <sub>15</sub> H <sub>14</sub> O <sub>4</sub>              | 258.0904 | 303.0886 | 8.541  | 80.27 | - | + | - | - |
| 41    | 4-Hydroxyphenylethanol                                      | C <sub>8</sub> H <sub>10</sub> O <sub>2</sub>               | 138.0685 | 183.0667 | 10.393 | 86.13 | - | + | - | - |
| 42    | 4-Methyl-3-oxoadipate-enol-lactone                          | C <sub>7</sub> H <sub>8</sub> O <sub>4</sub>                | 156.0433 | 215.0572 | 7.206  | 95.20 | - | - | - | + |
| 43    | 4-Methyl-octanoic acid                                      | C <sub>9</sub> H <sub>18</sub> O <sub>2</sub>               | 158.1311 | 217.1451 | 11.482 | 90.79 | - | + | - | + |
| 44    | 4-methylpentyl 3-methylbutanoate                            | C <sub>11</sub> H <sub>22</sub> O <sub>2</sub>              | 186.1624 | 185.1546 | 13.424 | 86.72 | - | + | - | + |
| 45    | 5-Carboxyvanillic acid                                      | C <sub>9</sub> H <sub>8</sub> O <sub>6</sub>                | 212.033  | 211.0256 | 3.755  | 93.39 | - | + | - | + |
| 46    | 5-O-Methylembelin                                           | C <sub>18</sub> H <sub>28</sub> O <sub>4</sub>              | 308.1997 | 307.1924 | 13.928 | 80.26 | - | + | - | + |
| 47    | 8'-Hydroxyabscisate                                         | C <sub>15</sub> H <sub>20</sub> O <sub>5</sub>              | 280.132  | 279.1247 | 9.129  | 94.28 | - | - | - | + |
| 48    | 9,12,15-octadecatrienoic acid,2-phenyl-1,3-dioxan5-yl ester | C <sub>28</sub> H <sub>40</sub> O <sub>4</sub>              | 440.2946 | 439.2879 | 15.515 | 86.76 | - | + | + | - |
| 49    | Aconitic acid                                               | C <sub>6</sub> H <sub>6</sub> O <sub>6</sub>                | 174.0172 | 173.0099 | 6.281  | 97.02 | - | + | - | + |
| 50    | Alfafuran                                                   | C <sub>14</sub> H <sub>10</sub> O <sub>5</sub>              | 258.0538 | 303.0518 | 9.048  | 82.33 | - | + | - | + |
| 51    | Alpha-Ionone                                                | C <sub>13</sub> H <sub>20</sub> O                           | 192.1517 | 251.1654 | 14.686 | 81.60 | + | + | + | + |
| 52    | Aminofurantoin                                              | C <sub>8</sub> H <sub>8</sub> N <sub>4</sub> O <sub>3</sub> | 208.0599 | 267.0736 | 3.00   | 92.68 | - | + | - | - |
| 53    | arbutin                                                     | C <sub>12</sub> H <sub>16</sub> O <sub>7</sub>              | 272.0904 | 317.0888 | 4.853  | 93.31 | + | + | - | + |
| 54    | Arjunolic acid                                              | C <sub>30</sub> H <sub>48</sub> O <sub>5</sub>              | 488.3526 | 547.3671 | 15.351 | 84.63 | - | + | - | + |
| 55    | Artemether                                                  | C <sub>16</sub> H <sub>26</sub> O <sub>5</sub>              | 298.1794 | 297.1719 | 15.431 | 91.87 | - | + | - | + |
| 56    | Artesunate                                                  | C <sub>19</sub> H <sub>28</sub> O <sub>8</sub>              | 384.1781 | 383.1701 | 13.34  | 75.20 | - | + | - | - |
| 57    | Aucubin                                                     | C <sub>15</sub> H <sub>22</sub> O <sub>9</sub>              | 346.1279 | 345.1208 | 7.281  | 91.01 | - | + | - | + |
| 58    | Benzaldehyde                                                | C <sub>7</sub> H <sub>6</sub> O                             | 106.0423 | 151.0405 | 10.066 | 98.41 | - | - | - | + |
| 59    | Benzofuran                                                  | C <sub>8</sub> H <sub>6</sub> O                             | 118.0425 | 163.0407 | 8.881  | 97.45 | - | + | - | - |
| 60    | Benzoic acid                                                | C <sub>7</sub> H <sub>6</sub> O <sub>2</sub>                | 122.0373 | 121.03   | 9.138  | 96.01 | - | + | - | + |
| 61    | Benzoquinoneacetic acid                                     | C <sub>8</sub> H <sub>6</sub> O <sub>4</sub>                | 166.027  | 211.0252 | 5.184  | 85.00 | - | + | - | - |
| 62    | Benzyl 3-methylbutanoate                                    | C <sub>12</sub> H <sub>16</sub> O <sub>2</sub>              | 192.1158 | 251.1295 | 10.394 | 81.87 | - | + | - | + |
| 63    | Beta dehydro-agarofuran                                     | C <sub>14</sub> H <sub>22</sub> O                           | 206.1674 | 265.1812 | 11.664 | 85.51 | - | + | - | + |
| Sr No | Name                                                        | Formula                                                     | Mass     | m/z      | RT     | Score | M | K | N | W |
| 64    | Bolegrevilol                                                | C <sub>13</sub> H <sub>24</sub> O <sub>2</sub>              | 212.1786 | 257.1768 | 14.595 | 90.82 | - | - | - | + |

| 65    | Caffeine                                | C <sub>8</sub> H <sub>10</sub> N <sub>4</sub> O <sub>2</sub> | 194.0799 | 239.0784 | 4.176  | 93.50 | - | + | + | - |
|-------|-----------------------------------------|--------------------------------------------------------------|----------|----------|--------|-------|---|---|---|---|
| 66    | Capsidiol                               | C <sub>15</sub> H <sub>24</sub> O <sub>2</sub>               | 236.1788 | 281.1771 | 11.065 | 80.15 | - | + | - | + |
| 67    | Casbene                                 | C <sub>20</sub> H <sub>32</sub>                              | 272.251  | 317.2493 | 14.598 | 84.07 | - | + | - | - |
| 68    | Cis-Gondoic acid                        | C <sub>20</sub> H <sub>38</sub> O <sub>2</sub>               | 310.2875 | 309.2802 | 11.906 | 80.39 | - | + | - | - |
| 69    | Citric acid                             | C <sub>6</sub> H <sub>8</sub> O <sub>7</sub>                 | 192.0278 | 191.0205 | 4.256  | 83.59 | + | + | - | + |
| 70    | Citronellyl formate                     | C <sub>11</sub> H <sub>20</sub> O <sub>2</sub>               | 184.1469 | 229.145  | 13.592 | 93.74 | - | + | - | + |
| 71    | Coenzyme Q4                             | C <sub>29</sub> H <sub>42</sub> O <sub>4</sub>               | 454.3102 | 453.3032 | 10.729 | 85.25 | - | - | - | + |
| 72    | Coumaric acid                           | C <sub>9</sub> H <sub>8</sub> O <sub>3</sub>                 | 164.048  | 163.0407 | 8.881  | 97.45 | - | + | - | - |
| 73    | Crystambine                             | C <sub>35</sub> H <sub>52</sub> O <sub>8</sub>               | 600.3689 | 599.3624 | 14.352 | 76.01 | - | + | - | - |
| 74    | Cynaroside                              | C <sub>21</sub> H <sub>20</sub> O <sub>11</sub>              | 448.1031 | 447.0957 | 8.63   | 87.12 | - | + | - | + |
| 75    | Bolegrevilol                            | C <sub>28</sub> H <sub>40</sub> O <sub>4</sub>               | 440.2927 | 439.2854 | 15.53  | 80.54 | + | + | - | + |
| 76    | D-Erythroascorbic acid 1'-a-D-glucoside | C <sub>11</sub> H <sub>16</sub> O <sub>10</sub>              | 308.0761 | 353.0743 | 4.176  | 91.50 | - | + | - | - |
| 77    | D-Glucoside                             | C <sub>7</sub> H <sub>14</sub> O <sub>6</sub>                | 194.0798 | 239.0779 | 4.012  | 92.42 | - | + | - | - |
| 78    | Di 2- propenyl disulphide               | C <sub>6</sub> H <sub>10</sub> S <sub>2</sub>                | 146.0221 | 191.0201 | 4.265  | 80.73 | - | + | + | + |
| 79    | Diacetyl                                | C <sub>4</sub> H <sub>6</sub> O <sub>2</sub>                 | 86.0367  | 145.051  | 6.029  | 85.87 | - | + | - | - |
| 80    | Dihydro-3-coumaric acid                 | C <sub>9</sub> H <sub>10</sub> O <sub>3</sub>                | 166.0638 | 225.0775 | 9.637  | 95.72 | - | + | + | - |
| 81    | Dihydroartemisinin                      | C <sub>15</sub> H <sub>24</sub> O <sub>5</sub>               | 284.1622 | 283.156  | 8.206  | 74.76 | - | + | - | + |
| 82    | Dihydrojasmonic Acid, Methyl Ester      | C <sub>13</sub> H <sub>22</sub> O <sub>3</sub>               | 226.1569 | 285.1706 | 14.68  | 83.57 | - | + | - | + |
| 83    | Dihydroxyacetone                        | C <sub>3</sub> H <sub>6</sub> O <sub>3</sub>                 | 90.0321  | 135.0305 | 3.004  | 97.57 | - | + | - | + |
| 84    | Diplosalsalate                          | C <sub>16</sub> H <sub>12</sub> O <sub>6</sub>               | 300.0646 | 299.0573 | 10.981 | 93.57 | - | + | - | + |
| 85    | DL-Î±-Lipoic Acid                       | C <sub>8</sub> H <sub>14</sub> O <sub>2</sub> S <sub>2</sub> | 206.0436 | 205.0361 | 6.365  | 82.15 | - | + | - | + |
| 86    | D-Mannonate                             | C <sub>6</sub> H <sub>12</sub> O <sub>7</sub>                | 196.0587 | 195.0514 | 2.916  | 99.18 | + | - | - | + |
| 87    | Dodecanedioic acid                      | C <sub>10</sub> H <sub>18</sub> O <sub>4</sub>               | 202.1212 | 201.1139 | 9.974  | 97.41 | + | + | - | + |
| 88    | Elemicin                                | C <sub>12</sub> H <sub>16</sub> O <sub>3</sub>               | 208.1102 | 207.1031 | 12.752 | 86.82 | - | - | + | - |
| 89    | Embelin                                 | C <sub>17</sub> H <sub>26</sub> O <sub>4</sub>               | 294.1835 | 293.1776 | 14.434 | 70.13 | + | + | + | + |
| 90    | Embeliol                                | C <sub>17</sub> H <sub>28</sub> O <sub>4</sub>               | 296.2002 | 341.1986 | 13.078 | 74.75 | - | - | - | + |
| 91    | Embeliquinone                           | C <sub>22</sub> H <sub>36</sub> O <sub>4</sub>               | 364.2626 | 363.2556 | 14.684 | 90.73 | - | + | - | - |
| Sr No | Name                                    | Formula                                                      | Mass     | m/z      | RT     | Score | M | K | N | W |
| 92    | Ethyl 1-methylpropyl disulfide          | C <sub>6</sub> H <sub>14</sub> S <sub>2</sub>                | 150.0538 | 195.0518 | 2.92   | 81.00 | - | + | - | + |

| 93    | Ethyl dodecanoate                                                   | C <sub>14</sub> H <sub>28</sub> O <sub>2</sub>                | 228.2085 | 227.2011 | 14.598 | 85.81 | - | + | - | + |
|-------|---------------------------------------------------------------------|---------------------------------------------------------------|----------|----------|--------|-------|---|---|---|---|
| 94    | E-trimenal                                                          | C <sub>13</sub> H <sub>22</sub> O                             | 194.1677 | 253.1816 | 13.166 | 84.84 | - | + | - | - |
| 95    | Forskolin                                                           | C <sub>22</sub> H <sub>34</sub> O <sub>7</sub>                | 410.2312 | 469.2441 | 15.347 | 80.29 | - | + | - | - |
| 96    | Fumaric acid                                                        | C <sub>4</sub> H <sub>4</sub> O <sub>4</sub>                  | 116.0113 | 115.0043 | 3.172  | 85.20 | - | + | - | + |
| 97    | Furanone                                                            | C <sub>4</sub> H <sub>4</sub> O <sub>2</sub>                  | 84.0215  | 143.0353 | 7.122  | 85.97 | - | + | - | + |
| 98    | Furodysin                                                           | C <sub>15</sub> H <sub>20</sub> O                             | 216.1522 | 275.166  | 10.645 | 84.28 | - | + | - | - |
| 99    | Galactonic acid                                                     | C <sub>6</sub> H <sub>12</sub> O <sub>7</sub>                 | 196.0587 | 195.0514 | 2.916  | 99.18 | - | + | - | + |
| 100   | Gamolenic acid                                                      | C <sub>18</sub> H <sub>30</sub> O <sub>2</sub>                | 278.2251 | 277.2185 | 11.905 | 80.77 | - | + | - | + |
| 101   | Geinstin                                                            | C <sub>18</sub> H <sub>26</sub> O <sub>4</sub>                | 306.1817 | 351.1822 | 14.516 | 81.39 | - | + | - | + |
| 102   | Geranyl-hydroxybenzoate                                             | C <sub>17</sub> H <sub>22</sub> O <sub>3</sub>                | 274.157  | 319.1539 | 11.242 | 75.72 | - | + | - | - |
| 103   | Glucoheptonic acid                                                  | C <sub>7</sub> H <sub>14</sub> O <sub>8</sub>                 | 226.0694 | 285.0838 | 3.084  | 92.46 | - | + | - | + |
| 104   | Heneicosanoic acid                                                  | C <sub>21</sub> H <sub>42</sub> O <sub>2</sub>                | 326.3192 | 371.3174 | 14.771 | 80.68 | - | - | - | + |
| 105   | Hexadecanedioic acid                                                | C <sub>16</sub> H <sub>30</sub> O <sub>4</sub>                | 286.2151 | 285.2079 | 11.571 | 94.66 | - | + | - | + |
| 106   | Î'-Hexalactone                                                      | C <sub>6</sub> H <sub>10</sub> O <sub>2</sub>                 | 114.0685 | 113.0613 | 8.298  | 85.61 | - | + | - | - |
| 107   | Î±-Phenylcyclohexylglycolic acid                                    | C <sub>14</sub> H <sub>18</sub> O <sub>3</sub>                | 234.1263 | 279.1245 | 9.133  | 84.32 | - | + | - | - |
| 108   | Isocaproic acid                                                     | C <sub>6</sub> H <sub>12</sub> O <sub>2</sub>                 | 116.084  | 161.0822 | 7.374  | 86.81 | + | + | - | + |
| 109   | Isoquercitrin                                                       | C <sub>21</sub> H <sub>20</sub> O <sub>12</sub>               | 464.098  | 463.0907 | 8.793  | 87.18 | - | + | - | - |
| 110   | Isorhamnetin                                                        | C <sub>16</sub> H <sub>12</sub> O <sub>7</sub>                | 316.0597 | 315.0524 | 10.726 | 78.44 | - | - | - | + |
| 111   | Kaempferol 3-O-xyloside                                             | C <sub>20</sub> H <sub>18</sub> O <sub>10</sub>               | 418.0925 | 463.0907 | 8.213  | 87.18 | - | + | - | + |
| 112   | Lactapiperanol C                                                    | C <sub>16</sub> H <sub>26</sub> O <sub>4</sub>                | 282.1843 | 327.1828 | 13.592 | 86.18 | - | + | - | + |
| 114   | Lespedezaflavanone F                                                | C <sub>27</sub> H <sub>32</sub> O <sub>5</sub>                | 436.225  | 435.2179 | 9.476  | 78.25 | - | - | + | - |
| 115   | Lipoic acid, reduced                                                | C <sub>8</sub> H <sub>16</sub> O <sub>2</sub> S <sub>2</sub>  | 208.0595 | 207.0516 | 3.756  | 84.86 | - | + | - | + |
| 116   | Lumichrome                                                          | C <sub>12</sub> H <sub>10</sub> N <sub>4</sub> O <sub>2</sub> | 242.0808 | 241.0734 | 7.788  | 84.68 | + | + | - | + |
| 117   | Malic acid                                                          | C <sub>4</sub> H <sub>6</sub> O <sub>5</sub>                  | 134.0221 | 133.0148 | 4.097  | 98.07 | - | + | - | + |
| 118   | N-(3-Carboxylpropyl)-5-amino-2-hydroxy-3-tridecyl-1,4-benzo-quinone | C <sub>23</sub> H <sub>38</sub> N O <sub>5</sub>              | 408.2751 | 407.2676 | 10.148 | 80.83 | - | - | + | - |
| 119   | Naringenin                                                          | C <sub>15</sub> H <sub>12</sub> O <sub>5</sub>                | 272.0696 | 271.0622 | 10.906 | 93.52 | - | + | - | - |
| 120   | N-propyl sec-butyl disulfide                                        | C <sub>7</sub> H <sub>14</sub> S <sub>2</sub>                 | 162.0536 | 221.0676 | 6.785  | 85.79 | + | + | + | + |
| Sr No | Name                                                                | Formula                                                       | Mass     | m/z      | RT     | Score | M | K | N | W |
| 121   | Oxalic acid                                                         | C <sub>2</sub> H <sub>2</sub> O <sub>4</sub>                  | 89.9957  | 149.0098 | 3.084  | 93.78 | - | + | - | - |

|     |                            |                                                               |          |          |        |       |   |   |   |   |
|-----|----------------------------|---------------------------------------------------------------|----------|----------|--------|-------|---|---|---|---|
| 122 | Oxaloacetate               | C <sub>4</sub> H <sub>4</sub> O <sub>5</sub>                  | 132.0065 | 191.0203 | 4.256  | 98.09 | - | + | - | + |
| 123 | Pentan-3-one               | C <sub>5</sub> H <sub>10</sub> O                              | 86.0733  | 131.0713 | 9.814  | 85.65 | - | - | + | + |
| 124 | Phenylglucoside            | C <sub>12</sub> H <sub>16</sub> O <sub>6</sub>                | 256.0959 | 255.0887 | 9.306  | 80.09 | - | + | - | - |
| 125 | Piceatannol                | C <sub>14</sub> H <sub>12</sub> O <sub>4</sub>                | 244.0744 | 243.0674 | 8.370  | 71.91 | - | + | - | - |
| 126 | p-Methylolphenol           | C <sub>7</sub> H <sub>8</sub> O <sub>2</sub>                  | 124.0528 | 183.0667 | 10.393 | 86.50 | - | + | - | - |
| 127 | Procurcumenol              | C <sub>15</sub> H <sub>22</sub> O <sub>2</sub>                | 234.1627 | 293.1776 | 15.534 | 81.44 | - | + | + | + |
| 128 | Propiolic acid             | C <sub>3</sub> H <sub>2</sub> O <sub>2</sub>                  | 70.0052  | 115.0035 | 15.445 | 86.19 | - | + | - | - |
| 129 | Purifolin                  | C <sub>24</sub> H <sub>24</sub> O <sub>13</sub>               | 520.1202 | 519.113  | 4.938  | 73.89 | - | - | - | + |
| 130 | Quercetin                  | C <sub>15</sub> H <sub>10</sub> O <sub>7</sub>                | 302.0441 | 301.0368 | 10.141 | 92.90 | - | + | - | - |
| 131 | Quinol glucuronide         | C <sub>12</sub> H <sub>14</sub> O <sub>8</sub>                | 286.07   | 331.0682 | 5.516  | 91.73 | - | + | - | - |
| 132 | Rapanone                   | C <sub>19</sub> H <sub>30</sub> O <sub>4</sub>                | 322.2153 | 321.2087 | 13.171 | 85.73 | - | + | - | + |
| 133 | Salidroside                | C <sub>14</sub> H <sub>20</sub> O <sub>7</sub>                | 300.1223 | 345.1207 | 7.284  | 88.14 | - | - | - | + |
| 134 | Stearic acid               | C <sub>18</sub> H <sub>36</sub> O <sub>2</sub>                | 284.2723 | 283.2652 | 11.911 | 93.75 | + | + | + | + |
| 135 | Sundiversifolide           | C <sub>14</sub> H <sub>22</sub> O <sub>3</sub>                | 238.1571 | 297.1709 | 11.319 | 84.01 | - | + | - | + |
| 136 | Tetradecene                | C <sub>14</sub> H <sub>28</sub>                               | 196.22   | 255.2339 | 0.572  | 96.94 | + | + | - | + |
| 137 | Tetrahydrofuran            | C <sub>4</sub> H <sub>8</sub> O                               | 72.0577  | 117.0559 | 6.529  | 86.55 | - | + | - | + |
| 138 | Theobromine                | C <sub>7</sub> H <sub>8</sub> N <sub>4</sub> O <sub>2</sub>   | 180.0644 | 179.0571 | 3.004  | 96.13 | + | + | + | + |
| 139 | Tricin                     | C <sub>17</sub> H <sub>14</sub> O <sub>7</sub>                | 330.0755 | 329.0679 | 10.814 | 85.51 | - | + | - | - |
| 140 | Tridecanoic acid           | C <sub>13</sub> H <sub>26</sub> O <sub>2</sub>                | 214.1943 | 213.187  | 15.272 | 95.31 | + | + | - | + |
| 141 | Undecan-2-one              | C <sub>11</sub> H <sub>22</sub> O                             | 170.1678 | 215.1661 | 11.299 | 94.73 | - | + | - | + |
| 142 | Uracil                     | C <sub>4</sub> H <sub>4</sub> N <sub>2</sub> O <sub>2</sub>   | 112.0275 | 111.0202 | 15.1   | 87.52 | - | + | - | + |
| 143 | Vanillic acid              | C <sub>8</sub> H <sub>8</sub> O <sub>4</sub>                  | 168.0427 | 167.0355 | 9.133  | 85.42 | - | + | - | + |
| 144 | Xanthoxic acid             | C <sub>15</sub> H <sub>22</sub> O <sub>4</sub>                | 266.1535 | 265.1461 | 12.835 | 85.79 | - | + | - | - |
| 145 | Hexenyl(3Z)-Hexenoate,(3Z) | C <sub>12</sub> H <sub>20</sub> O <sub>2</sub>                | 196.1456 | 219.1352 | 2.833  | 70.31 | - | + | - | + |
| 146 | 10-Oxogeranial             | C <sub>10</sub> H <sub>14</sub> O <sub>2</sub>                | 166.10   | 167.1071 | 2.583  | 78.90 | - | + | + | + |
| 147 | Acebutolol                 | C <sub>18</sub> H <sub>28</sub> N <sub>2</sub> O <sub>4</sub> | 336.2061 | 337.2131 | 3.160  | 84.47 | - | + | - | + |
| 148 | Cannabidiol                | C <sub>21</sub> H <sub>30</sub> O <sub>2</sub>                | 314.2244 | 337.2134 | 4.181  | 84.58 | - | + | + | - |
| 149 | Trimipramine               | C <sub>20</sub> H <sub>26</sub> N <sub>2</sub>                | 294.2095 | 295.2168 | 11.072 | 86.08 | - | + | + | - |

**Table S3: Contribution of differentially regulated compounds in groupings of the accessions.** Results of pairwise analysis of similarity percentage (SIMPER test) with Bray-Curtis dissimilarity index showed 15 major compounds (50% cut-off) contributed in accession groupings.

| Compounds                              | Contribution % | Cumulative contribution% |
|----------------------------------------|----------------|--------------------------|
| Acebutolol                             | 3.958          | 3.958                    |
| Cannabidiol                            | 3.958          | 7.916                    |
| 3-Isopropylmalic acid                  | 3.534          | 11.45                    |
| Decanedioic acid                       | 3.534          | 14.98                    |
| delta-Tridecalactone                   | 3.534          | 18.52                    |
| Citric acid                            | 3.534          | 22.05                    |
| tetradecene                            | 3.534          | 25.59                    |
| procurcumenol                          | 3.453          | 29.04                    |
| hexenyl-(3z)-hexenoate (3z-)           | 3.453          | 32.49                    |
| di-2-Propenyl disulfide                | 3.453          | 35.94                    |
| 3-Furoic acid                          | 3.003          | 38.95                    |
| Malic acid                             | 3.003          | 41.95                    |
| Oxaloacetate                           | 3.003          | 44.95                    |
| 2-Formylglutarate                      | 3.003          | 47.95                    |
| 3-Amino-3-(4-hydroxyphenyl) propanoate | 3.003          | 50.96                    |

**Table S4: Reported functions of the identified compounds from Embelia accessions.**



| Sr no | Compound name                          | Specific category                    | Function                                                      | Reference                                                         |
|-------|----------------------------------------|--------------------------------------|---------------------------------------------------------------|-------------------------------------------------------------------|
| 1     | 1,2-benzoquinone                       | O-benzoquinones                      | Fungicide, antimicrobial                                      | M., H. A. Ahmed, and H.A. M. Mossabl, 2014.                       |
| 2     | 1-pentanesulfenothioic acid            | Hydropersulfides                     | Plant and bacterial metabolite (Function not known)           | Pubchem                                                           |
| 3     | 2-formylglutarate                      | Branched fatty acids                 | Plant metabolite (Function not known)                         | Pubchem                                                           |
| 4     | 3,4,5-trihydroxyflavone                | Flavanones                           | Antidepressant, antimutagenic and antioxidant                 | 1) Barboza, R. S., et al. 2018 2) Grigalius, I. and Vilma P. 2017 |
| 5     | 3,4-dihydroxybutyric acid              | Hydroxy fatty acids                  | Satiety or the feeling of fullness and suppresses food intake | Kumar, P., et al. 2005                                            |
| 6     | 3-amino-3-(4-hydroxyphenyl) propanoate | $\beta$ -amino acids and derivatives | Anticancer                                                    | Chen, Y., et al. 2009                                             |
| 7     | 3-furoic acid                          | Furans                               | Plant metabolite (Function not known)                         | Pubchem                                                           |
| 8     | 3-isopropylmalic acid                  | Hydroxy fatty acids                  | Plant and bacterial metabolite (Function not known)           | Pubchem                                                           |
| 9     | Aconitic acid                          | Tricarboxylic acid                   | Anticancers                                                   | Kumar, V. and Nanthini R. 2018                                    |
| 10    | Benzoic acid                           | Benzenoids                           | Fungistatic                                                   | Gould, A.G., and Edna K. C. 1930                                  |
| 11    | Bolegrevilol                           | Diterpenoid                          | Antioxidant                                                   | Polterait, O., 1997                                               |
| 12    | Citric acid                            | Tricarboxylic acid                   | Anticoagulant                                                 | Chen, H. et al, 2021                                              |
| 13    | Coumaric acid                          | Hydroxycinnamic acids                | Antihemorrhagic activity                                      | De Sousa F. et al. 2021                                           |
| 14    | Decanedioic acid                       | Medium-chain dicarboxylic acids      | Antagonists of the oestrogen receptor alpha (er-alpha)        | Pubchem                                                           |
| 15    | Delta-tridecalactone                   | Delta-lactone                        | Anticancers                                                   | Pubchem                                                           |
| 16    | Di-2-propenyl disulfide                | Diallyl disulfide                    | Antineoplastic agent, an antifungal agent                     | Pyun, M-S., and S. Shin, 2006                                     |
| 17    | Dl-alpha-lipoic acid                   | Dithiol short chain fatty acid       | Anti-oxidant                                                  | Shay, K.P. et al. 2009                                            |
| 18    | Embelin                                | P-benzoquinones                      | Antimicrobial, antihelminthic, antipyretic, antioxidant,      | Radhakrishnan, N., et al. 2011                                    |

| Sr no | Compound name                  | Specific category                  | Function                                                                                           | Reference                                  |
|-------|--------------------------------|------------------------------------|----------------------------------------------------------------------------------------------------|--------------------------------------------|
| 19    | Ethyl-1-methylpropyl disulfide | Dialkyldisulfides                  | Plant metabolite (Function not known)                                                              | Farhadi, F., et al. 2020                   |
| 20    | Galactonic acid                | Sugar acids                        | Plant and animal metabolite (Function not known)                                                   | Wagner, C., Michael S. and Joachim K. 2003 |
| 21    | Hexadecanedioic acid           | Long-chain dicarboxylic acid acids | Anticancer                                                                                         | Bharath, B., et al. 2021                   |
| 22    | Isoquercitrin                  | Flavonol glycosides                | osteogenesis regulator, an antioxidant, a histamine antagonist, an antipruritic drug               | Pubchem                                    |
| 23    | Malic acid                     | 2-hydroxydicarboxylic acid         | Xerostomia, depression, and hypertension.                                                          | Gómez-Moreno, G.2013                       |
| 24    | Naringenin                     | Flavanones                         | Modulates immune system activity, antioxidant, anti-atherogenic and anti-inflammatory              | Pubchem                                    |
| 25    | N-propyl sec-butyl disulfide   | Dialkyldisulfides                  | Essential oil, antimicrobial                                                                       | Daneshkazemi, A., et al. 2019              |
| 26    | Oxaloacetate                   | Dicarboxylic acid                  | Antagonists of the androgen receptor (ar) signalling pathway using                                 | Pubchem                                    |
| 27    | Piceatannol                    | Stilbenes                          | Antineoplastic agent, a plant metabolite, a hypoglycaemic agent, an apoptosis inducer              | Banik, K., et al. 2020                     |
| 28    | Procurcumenol                  | Guaiane sesquiterpenes             | Anti-inflammatory                                                                                  | Nishidono, Y., et al. 2020                 |
| 29    | Quercetin                      | Flavonols                          | Combined with chemotherapeutic drugs, in vitro, produces anti-inflammatory and anti-allergy effect | Chirumbolo, S2010                          |
| 30    | Rapanone                       | P-benzoquinones                    | Inhibits mitochondrial respiration and induces hepg2 cell death                                    | Pubchem                                    |
| 31    | Tetradecene                    | Unsaturated aliphatic hydrocarbons | Antagonists of the estrogen receptor alpha                                                         | Pubchem                                    |

| Sr no | Compound name                | Specific category    | Function                                                                                                                    | Reference                                        |
|-------|------------------------------|----------------------|-----------------------------------------------------------------------------------------------------------------------------|--------------------------------------------------|
| 32    | Undecan-2-one                | Fatty acyl           | Anticancer                                                                                                                  | Tanoh, E. A., et al2018                          |
| 33    | Vanillic acid                | Hydroxybenzoic acids | Inhibits inflammatory pain by inhibiting neutrophil recruitment, oxidative stress, cytokine production, and NFkB activation | Pubchem                                          |
| 34    | Acebutolol                   | Alkyl-phenylketones  | Has stabilizing and quinidine-like effects on cardiac rhythm as well as weak inherent sympathomimetic action.               | Pubchem                                          |
| 35    | Cannabidiol                  | Cannabinoids         | Anti-proliferative, anti-angiogenic and pro-apoptotic activity through various mechanisms,                                  | Sainz-Cort, A., Claudia M.-S., and Enric E. 2020 |
| 36    | Hexenyl-(3z)-hexenoate (3z-) | Wax monoesters       | Xerostomia, depression, and hypertension.                                                                                   | Al-S.and Ali E. 2017                             |

**Table S5: List of ISSR primers with their nucleotide sequences and annealing temperatures used for amplification.** A total nine polymorphic ISSR primers were used for genetic diversity analysis.

| Sr No | Primer   | Sequence                           | T <sub>m</sub> (°C) |
|-------|----------|------------------------------------|---------------------|
| 1     | ISSR 809 | (AG) <sub>8</sub> G                | 54                  |
| 2     | ISSR 810 | (GA) <sub>8</sub> T                | 54                  |
| 3     | ISSR 811 | (GA) <sub>8</sub> C                | 54                  |
| 4     | ISSR 816 | (CA) <sub>8</sub> T                | 53                  |
| 5     | ISSR 821 | (GT) <sub>8</sub> T                | 50                  |
| 6     | ISSR 849 | (GT) <sub>8</sub> YA               | 50                  |
| 7     | ISSR 853 | (TC) <sub>8</sub> RT               | 50                  |
| 8     | ISSR 857 | (AC) <sub>8</sub> YG               | 60                  |
| 9     | ISSR 881 | (G) <sub>12</sub> (T) <sub>3</sub> | 50                  |

**Table S6: Analysis of genetic diversity in Embelia accession by ISSR primers.**

| <b>Sr. No.</b> | <b>ISSR primer</b> | <b>Monomorphic bands</b> | <b>Polymorphic bands</b> | <b>Total bands</b> | <b>% polymorphism</b> | <b>% polymorphic bands (PPB)</b> |
|----------------|--------------------|--------------------------|--------------------------|--------------------|-----------------------|----------------------------------|
| 1              | ISSR 809           | 00                       | 12                       | 12                 | 100                   | 12.76                            |
| 2              | ISSR 810           | 00                       | 09                       | 09                 | 100                   | 9.57                             |
| 3              | ISSR 811           | 00                       | 08                       | 08                 | 100                   | 8.51                             |
| 4              | ISSR 816           | 03                       | 06                       | 09                 | 66.6                  | 6.38                             |
| 5              | ISSR 821           | 00                       | 10                       | 10                 | 100                   | 10.63                            |
| 6              | ISSR 849           | 00                       | 11                       | 11                 | 100                   | 11.70                            |
| 7              | ISSR 853           | 00                       | 10                       | 10                 | 100                   | 10.63                            |
| 8              | ISSR 857           | 00                       | 13                       | 13                 | 100                   | 13.82                            |
| 9              | ISSR 881           | 01                       | 11                       | 12                 | 91.6                  | 11.70                            |
